# Supplementary material
Source: bioRxiv or medRxiv preprint supplement (https://medrxiv.org/highwire/filestream/77820/field_highwire_adjunct_files/0/2020.04.20.20072355-1.pdf)
Supplement: Supplementary file [file 2020.04.20.20072355-1.pdf]

# Supplementary appendix

Sipilä PN, Heikkilä N, Lindbohm JV, Hakulinen C, Vahtera J, Elovainio M, Suominen S, Väänänen A, Koskinen A, Nyberg ST, Pentti J, Strandberg TE, Kivimäki M. Hospital-treated infectious diseases and the risk of incident dementia: multicohort study with replication in the UK Biobank

## CONTENTS

|                                                                                                                   |     |
|-------------------------------------------------------------------------------------------------------------------|-----|
| eFigure 1. Selection of participants in the study.....                                                            | 2   |
| eMethods 1. Study cohorts and data collection .....                                                               | 3   |
| The Finnish Public Sector study (FPS).....                                                                        | 3   |
| The Health and Social Support study (HeSSup) .....                                                                | 4   |
| The Still Working study (STW).....                                                                                | 5   |
| The UK Biobank .....                                                                                              | 5   |
| eMethods 2. Proportionality of hazards .....                                                                      | 7   |
| eFigure 2. Visualisation of hazard ratios over time using exponentiated scaled Schoenfeld residuals .....         | 8   |
| eFigure 3. Dementia follow-up.....                                                                                | 11  |
| Part A. Dementia follow-up in the main analysis .....                                                             | 11  |
| Part B. Dementia follow-up from year 10 onwards .....                                                             | 12  |
| eFigure 4. Distribution of age at dementia diagnosis.....                                                         | 13  |
| eTable 1. Classification of hospital-treated infectious diseases in the study on diagnosis level.....             | 14  |
| eTable 2. ICD-10 codes for infectious diseases with the corresponding ICD-8 and ICD-9 codes ...                   | 52  |
| eTable 3. Demographic characteristics of participants at study entry by cohort.....                               | 76  |
| eTable 4. Demographic characteristics of participants at study entry in the UK Biobank (replication cohort) ..... | 77  |
| eTable 5. Distribution of Gram-negative bacterial infections .....                                                | 78  |
| eMethods 3. Stata code for data analysis .....                                                                    | 79  |
| Supplementary references .....                                                                                    | 113 |

**eFigure 1. Selection of participants in the study**

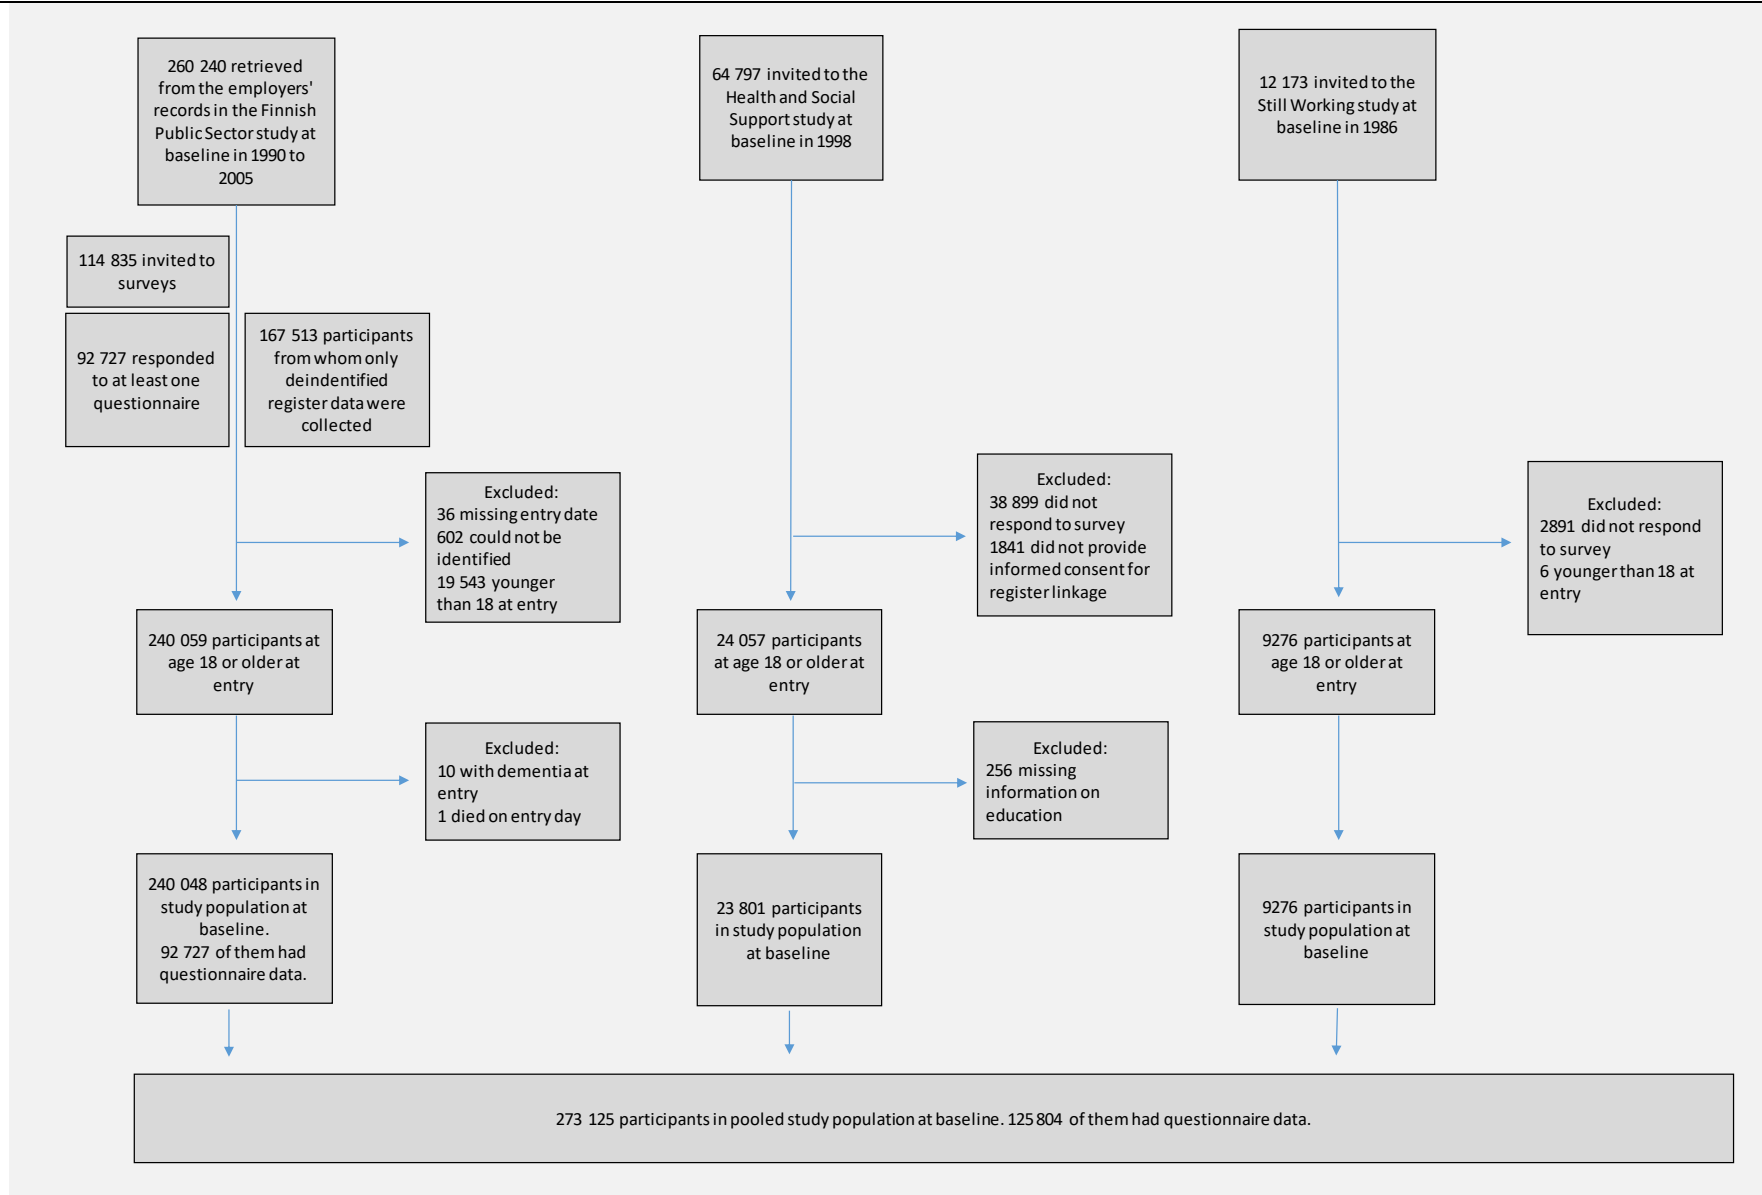

## **eMethods 1. Study cohorts and data collection**

### **The Finnish Public Sector study (FPS)**

The prospective Finnish Public Sector cohort study comprises 260 240 public sector employees from 10 Finnish towns and 6 Finnish hospital districts identified from the employers' registers.<sup>5</sup> 240 048 of them were available for this study and were linked to national registries of hospital discharge information (dates and diagnoses recorded by the National Institute for Health and Welfare) and medication reimbursement entitlements (dates and anatomical therapeutic chemical (ATC) codes recorded by the Finnish Social Insurance Institution) using the personal identification codes unique to each Finnish citizen. We also linked the participants to records on dates and causes of death from Statistics Finland. The ethics committee of Helsinki and Uusimaa Hospital District approved the register linkage and data analysis.

#### *Diagnoses of hospital-treated infectious diseases (index infections)*

We retrieved both primary and secondary diagnoses of hospital-treated diseases from inpatient hospital discharge information from 1 January 1980 to 31 December 2016, using the International Classification of Diseases, 10th Revision (ICD-10). The diagnosis codes from the 8th and 9th revisions (ICD-8 and ICD-9) were converted into the corresponding ICD-10 codes according to the national editions of the International Classification of Diseases (eTable 2 in this Supplement).<sup>2-4</sup>

#### *Covariates*

Participants' birthdate and sex were retrieved from the Finnish Population Information System. Information on the participants' education was available from Statistics Finland and analysed in three classes: low (basic education), intermediate (high school or vocational school), and high (university degree or other tertiary degree).

We defined comorbidities as follows: hypertension, ICD-10 codes I10–I15.9, ICD-8 and -9 codes 400–40499; diabetes mellitus, ICD-10 codes E10–E14.9, ICD-8 and -9 codes 250–25099; ischaemic heart disease, ICD-10 codes I20–I25.9, ICD-8 and -9 codes 410–41499; cerebrovascular disease, ICD-10 codes I60–I69.9, ICD-8 and -9 codes 430–43899; Parkinson's disease, ICD-10 code G20, ICD-8 and -9 codes 3320A and 34200. Additionally, we considered prescription medication reimbursement entitlements for the treatment of hypertension, diabetes mellitus, ischaemic heart disease, and Parkinson's disease (no reimbursement entitlements were granted for cerebrovascular disease during the study years). Data for hospitalisations were available from 1 January 1980 to 31 December 2016 and for medication reimbursement entitlements from 1964 to the end-of 2011 (diabetes), from 1970 to the end-of 2011 (hypertension), from 1986 to the end-of 2011 (ischaemic heart disease), and from 1966 to the end-of 2011 (Parkinson's disease).

A subsample of the study was invited to respond to mailed questionnaires (N = 114 835), and 92 727 of them responded to at least one questionnaire. Information on smoking status and alcohol drinking was retrieved from the earliest available self-report during the follow-up from June 1997 to November 2013 and was available for 90 305 participants on smoking and 90 740 participants on alcohol drinking. Smoking status was analysed in three categories (never smokers, ex-smokers, current smokers). The participants reported the number of different types of alcoholic drinks they consumed within a week. These reports were summed up to the total amount of alcoholic drinks consumed per week, with one drink estimated to contain approximately 10 grams of pure alcohol, and further categorized to four categories.<sup>6</sup> The categories were non-drinkers, moderate drinkers (women consuming 1–14 drinks per week and men consuming 1–21 drinks per week), intermediate drinkers (women consuming 15–20 drinks per week and men consuming 22–27 drinks per week), and heavy drinkers (women consuming 21 drinks per week or more and men consuming 28 drinks per week or more).

#### *Ascertainment of incident dementia*

We compiled dementia diagnoses from hospital discharge information, reimbursed prescription medication purchases, and causes of death. Inpatient discharge information from hospitals and health center wards was available from 1 January 1980 to 31 December 2016, causes of death from 1 January 1980 to 31 December 2011, medication reimbursement entitlements for the treatment of dementia from February 1999 to 31 December 2011, and outpatient hospital visits (including outpatient clinic, emergency room, and day ward visits) from 1 January 2012 to 31 December 2016. The date of incident dementia was defined as the first occurrence of dementia diagnosis, whether primary or secondary, in any of these information sources.

#### *Dementia follow-up*

Follow-up for incident dementia started on study entry (the first day of the year in which the participant was first employed between 1990 and 2005) and continued until dementia diagnosis, death, or the end of follow-up (31 December 2016), whichever came first. However, to

avoid immortal time bias,<sup>7</sup> we started the follow-up on the questionnaire date (or the latest questionnaire date if information on covariates was retrieved from more than one questionnaire) in the multivariate analyses (Table 2 in the main text) and in the analyses on conventional dementia risk factors (Figure 3 in the main text).

### **The Health and Social Support study (HeSSup)**

The Health and Social Support study is a prospective cohort study representative of the Finnish population.<sup>8</sup> A random sample from the Finnish Population Information System, stratified by sex and age group (20–24, 30–34, 40–44, and 50–54 years), was invited to respond a mailed questionnaire in 1998 (N = 64 797). This study comprises 24 057 respondents who returned the questionnaire and provided informed consent for register linkage. They were linked to national registries of hospital discharge information (dates and diagnoses recorded by the National Institute for Health and Welfare) and medication reimbursement entitlements (dates and anatomical therapeutic chemical (ATC) codes recorded by the Finnish Social Insurance Institution) using the personal identification codes unique to each Finnish citizen. The participants were also linked to records on dates and causes of death from Statistics Finland. The Turku University Central Hospital Ethics Committee approved the study.

#### *Diagnoses of hospital-treated diseases (index diseases)*

We retrieved both primary and secondary diagnoses of hospital-treated diseases from inpatient hospital discharge information available from 1 January 1998 to 31 December 2012 (with occasional information available from 4 August 1997 to 31 December 1997). We used the International Classification of Diseases, 10th Revision (ICD-10). All available data were coded according to ICD-10.

#### *Covariates*

Participants' birth year and sex were retrieved from the Finnish Population Information System. Information on education, smoking status, and alcohol drinking was retrieved from self-reports. Education was analysed in three classes: low (basic education), intermediate (apprenticeship, vocational school, or college degree), and high (university or polytechnic degree). Smoking status was analysed in three categories (never smokers, ex-smokers, current smokers). The participants reported the number of different types of alcoholic drinks they consumed within a week. These reports were summed up to the total amount of alcoholic drinks consumed per week, with one drink estimated to contain approximately 10 grams of pure alcohol, and further categorized to four categories.<sup>6</sup> The categories were non-drinkers, moderate drinkers (women consuming 1–14 drinks per week and men consuming 1–21 drinks per week), intermediate drinkers (women consuming 15–20 drinks per week and men consuming 22–27 drinks per week), and heavy drinkers (women consuming 21 drinks per week or more and men consuming 28 drinks per week or more).

We defined comorbidities as follows: hypertension, ICD-10 codes I10–I15.9, ICD-8 and -9 codes 400–40499; diabetes mellitus, ICD-10 codes E10–E14.9, ICD-8 and -9 codes 250–25099; ischaemic heart disease, ICD-10 codes I20–I25.9, ICD-8 and -9 codes 410–41499; cerebrovascular disease, ICD-10 codes I60–I69.9, ICD-8 and -9 codes 430–43899; Parkinson's disease, ICD-10 code G20, ICD-8 and -9 codes 3320A and 34200. Additionally, we considered prescription medication reimbursement entitlements for the treatment of hypertension, diabetes mellitus, ischaemic heart disease, and Parkinson's disease (no reimbursement entitlements were granted for cerebrovascular disease during the study years). Data for hospitalisations were available from 1 January 1998 to 31 December 2012 (with occasional information available from 4 August 1997 to 31 December 1997) and for medication reimbursement entitlements from 1964 to the end-of 2013 (diabetes) or from 1970 to the end-of 2013 (hypertension), from 1986 to the end-of 2013 (ischaemic heart disease), and from 1968 to the end-of 2013 (Parkinson's disease).

#### *Ascertainment of incident dementia*

We compiled dementia diagnoses from inpatient hospital discharge information, reimbursed prescription medication purchases, and causes of death. Inpatient discharge information from hospitals and health center wards was available from 1 January 1998 to 31 December 2012 (with occasional information available from 4 August 1997 to 31 December 1997), causes of death from cohort entry (1998) to 31 December 2013, and medication reimbursement entitlements for the treatment of dementia from February 1999 to 31 December 2013. The date of incident dementia was defined as the first occurrence of dementia diagnosis, whether primary or secondary, in any of these information sources.

#### *Dementia follow-up*

Follow-up for incident dementia started on study entry (1 January 1998) and continued until dementia diagnosis, death, or end of follow-up (31 December 2012), whichever came first.

## **The Still Working study (STW)**

The Still Working study is an ongoing prospective cohort study.<sup>9</sup> In 1986, all employees of Enso Gutzeit (a large forest industry company, which nowadays is part of Stora Enso) in Finland were invited to respond to a mailed questionnaire (N = 12 173). 9276 of them were available for this study and were linked to national registries of hospital discharge information (dates and diagnoses recorded by the National Institute for Health and Welfare) and medication reimbursement entitlements (dates and anatomical therapeutic chemical (ATC) codes recorded by the Finnish Social Insurance Institution) using the personal identification codes unique to each Finnish citizen. Participants were also linked to records on dates and causes of death from Statistics Finland. The ethics committee of the Finnish Institute of Occupational Health approved the study.

### *Diagnoses of hospital-treated diseases (index diseases)*

We retrieved both primary and secondary diagnoses of hospital-treated diseases from inpatient hospital discharge information from 1971 to 31 December 2016, using the International Classification of Diseases, 10th Revision (ICD-10). The diagnosis codes from the 8th and 9th revisions (ICD-8 and ICD-9) were converted into the corresponding ICD-10 codes according to the national editions of the International Classification of Diseases (eTable 1 in this Supplement).<sup>2-4</sup>

### *Covariates*

Participants' birth year and sex were retrieved from the Finnish Population Information System. Information on occupational grade, smoking status, and alcohol drinking was retrieved from self-reports. Occupational grade was analysed in three categories (low, intermediate, high). Smoking status was analysed in three categories (never smokers, ex-smokers, current smokers). The participants reported the number of different types of alcoholic drinks they consumed within a week. These reports were summed up to the total amount of alcoholic drinks consumed per week, with one drink estimated to contain approximately 10 grams of pure alcohol, and further categorized to four categories.<sup>6</sup> The categories were non-drinkers, moderate drinkers (women consuming 1–14 drinks per week and men consuming 1–21 drinks per week), intermediate drinkers (women consuming 15–20 drinks per week and men consuming 22–27 drinks per week), and heavy drinkers (women consuming 21 drinks per week or more and men consuming 28 drinks per week or more).

We defined comorbidities as follows: hypertension, ICD-10 codes I10–I15.9, ICD-8 and -9 codes 400–40499; diabetes mellitus, ICD-10 codes E10–E14.9, ICD-8 and -9 codes 250–25099; ischaemic heart disease, ICD-10 codes I20–I25.9, ICD-8 and -9 codes 410–41499; cerebrovascular disease, ICD-10 codes I60–I69.9, ICD-8 and -9 codes 430–43899; Parkinson's disease, ICD-10 code G20, ICD-8 and -9 codes 3320A and 34200. Additionally, we considered prescription medication reimbursement entitlements for the treatment of hypertension, diabetes mellitus, ischaemic heart disease, and Parkinson's disease (no reimbursement entitlements were granted for cerebrovascular disease during the study years). Data for hospitalisations were available from 1971 to 31 December 2016 and for medication reimbursement entitlements from 1964 to the end-of 2016 (diabetes) or from 1970 to the end-of 2016 (hypertension), from 1985 to the end-of 2016 (ischaemic heart disease), and from 1991 to the end-of 2016 (Parkinson's disease).

### *Ascertainment of incident dementia*

We compiled dementia diagnoses from hospital discharge information, reimbursed prescription medication purchases, and causes of death. Inpatient discharge information from hospitals and health center wards was available from 1971 to 31 December 2016, causes of death from study entry (in 1 March 1986) to 31 December 2016, medication reimbursement entitlements for the treatment of dementia from February 1999 to 31 December 2016, and outpatient hospital visits (including outpatient clinic, emergency room, and day ward visits) from 1 January 2012 to 31 December 2016. The date of incident dementia was defined as the first occurrence of dementia diagnosis, whether primary or secondary, in any of these information sources.

### *Dementia follow-up*

Follow-up for incident dementia started on study entry (1 March 1986) and continued until dementia diagnosis, death, or end of follow-up (31 December 2016), whichever came first.

## **The UK Biobank**

The UK Biobank is an ongoing prospective cohort study (<https://www.ukbiobank.ac.uk/>). In 2006–2010, 500 000 participants aged 40–69 years were recruited from the United Kingdom. The data collection has involved measures, blood, urine and saliva samples, and questionnaires. The participants have agreed to have their health followed. The UK Biobank study has been approved by the North West

Multi-centre Research Ethics Committee (MREC). It has also been approved by the Patient Information Advisory Group (PIAG) in England and Wales and the Community Health Index Advisory Group (CHIAG) in Scotland.

#### *Diagnoses of hospital-treated diseases (index diseases)*

We retrieved both primary and secondary diagnoses of hospital-treated diseases from linked hospital admission data from HES APC (Hospital Episode Statistics–Admitted Patient Care [England]), SMR01 (Scottish Morbidity Records–General/Acute Inpatient and Day Case Admissions [Scotland]) and PEDW (Patient Episode Database for Wales), using the International Classification of Diseases, 10th Revision (ICD-10).

#### *Covariates*

Covariates included participants' birth year and sex, education, smoking status, alcohol drinking, and body mass index. Body mass index was measured at baseline and the other covariates were based on self-reports. Education was analysed in three categories (low, intermediate, high). Smoking status was also analysed in three categories (never smokers, ex-smokers, current smokers). Alcohol consumption was self-reported using the question "About how often do you drink alcohol?", and the categories for alcohol drinking were non-drinkers, moderate drinkers (one to three times a month or once or twice a week), intermediate drinkers (three or four times a week), and heavy drinkers (daily or almost daily).

Diabetes mellitus was defined by self-report or hospitalisation for it (ICD-10 codes E10–E14 and ICD-8 and -9 codes under 250 as primary or secondary diagnosis). Hypertension was defined by measurement at baseline (systolic blood pressure  $\geq 140$  mmHg) or hospitalisation for it (ICD-10 codes I10–I15 and ICD-8 and -9 codes 400–40499 as primary or secondary diagnosis). Ischaemic heart disease was defined by ICD-10 codes I20–I25.9 and ICD-8 and -9 codes 410–41499. Cerebrovascular disease was defined by ICD-10 codes I60–I69.9 and ICD-8 and -9 codes 430–43899. Parkinson's disease was defined by the UK Biobank algorithm ([http://biobank.ndph.ox.ac.uk/showcase/showcase/docs/alg\\_outcome\\_pdp.pdf](http://biobank.ndph.ox.ac.uk/showcase/showcase/docs/alg_outcome_pdp.pdf)) that uses information from hospital records, death records, and self-reports.

#### *Ascertainment of incident dementia*

We defined all-cause dementia according to the UK Biobank algorithm ([http://biobank.ndph.ox.ac.uk/showcase/showcase/docs/alg\\_outcome\\_dementia.pdf](http://biobank.ndph.ox.ac.uk/showcase/showcase/docs/alg_outcome_dementia.pdf)) that uses information from hospital records, death records, and self-reports. Alzheimer's disease, frontotemporal dementia, and vascular dementia were defined by the same algorithm. Other types of dementia were defined by ICD-codes from linked records. Additionally, those with algorithm defined all-cause dementia without a specific dementia diagnosis were considered to have unspecified dementia. The date of incident dementia was defined as the first occurrence of dementia diagnosis.

#### *Dementia follow-up*

Follow-up for incident dementia started on study entry in 2006–2010 and continued until dementia diagnosis, death, or end of follow-up (7 February 2018), whichever came first.

## **eMethods 2. Proportionality of hazards**

We examined the proportional hazards assumption in the Cox models with scaled Schoenfeld residuals. These tests indicated a violation of the proportional hazards assumption for 8 classes of infectious diseases: any infectious disease, systemic bacterial infections, intracellular bacterial infections, Gram-negative bacterial infections, Gram-negative bacterial infections excluding those with known neurological sequelae, any viral infection, herpesvirus infections, and other potentially persistent viral infections. We assessed these diseases plotting exponentiated scaled Schoenfeld residuals using symmetric nearest neighbour smoothing (eFigure 2 on the next page of this Supplement).<sup>1</sup> The exponentiated scaled Schoenfeld residuals can be interpreted as hazard ratios and therefore visualize that the hazard ratios tended to diminish with increasing age.<sup>1</sup>

**eFigure 2. Visualisation of hazard ratios over time using exponentiated scaled Schoenfeld residuals**

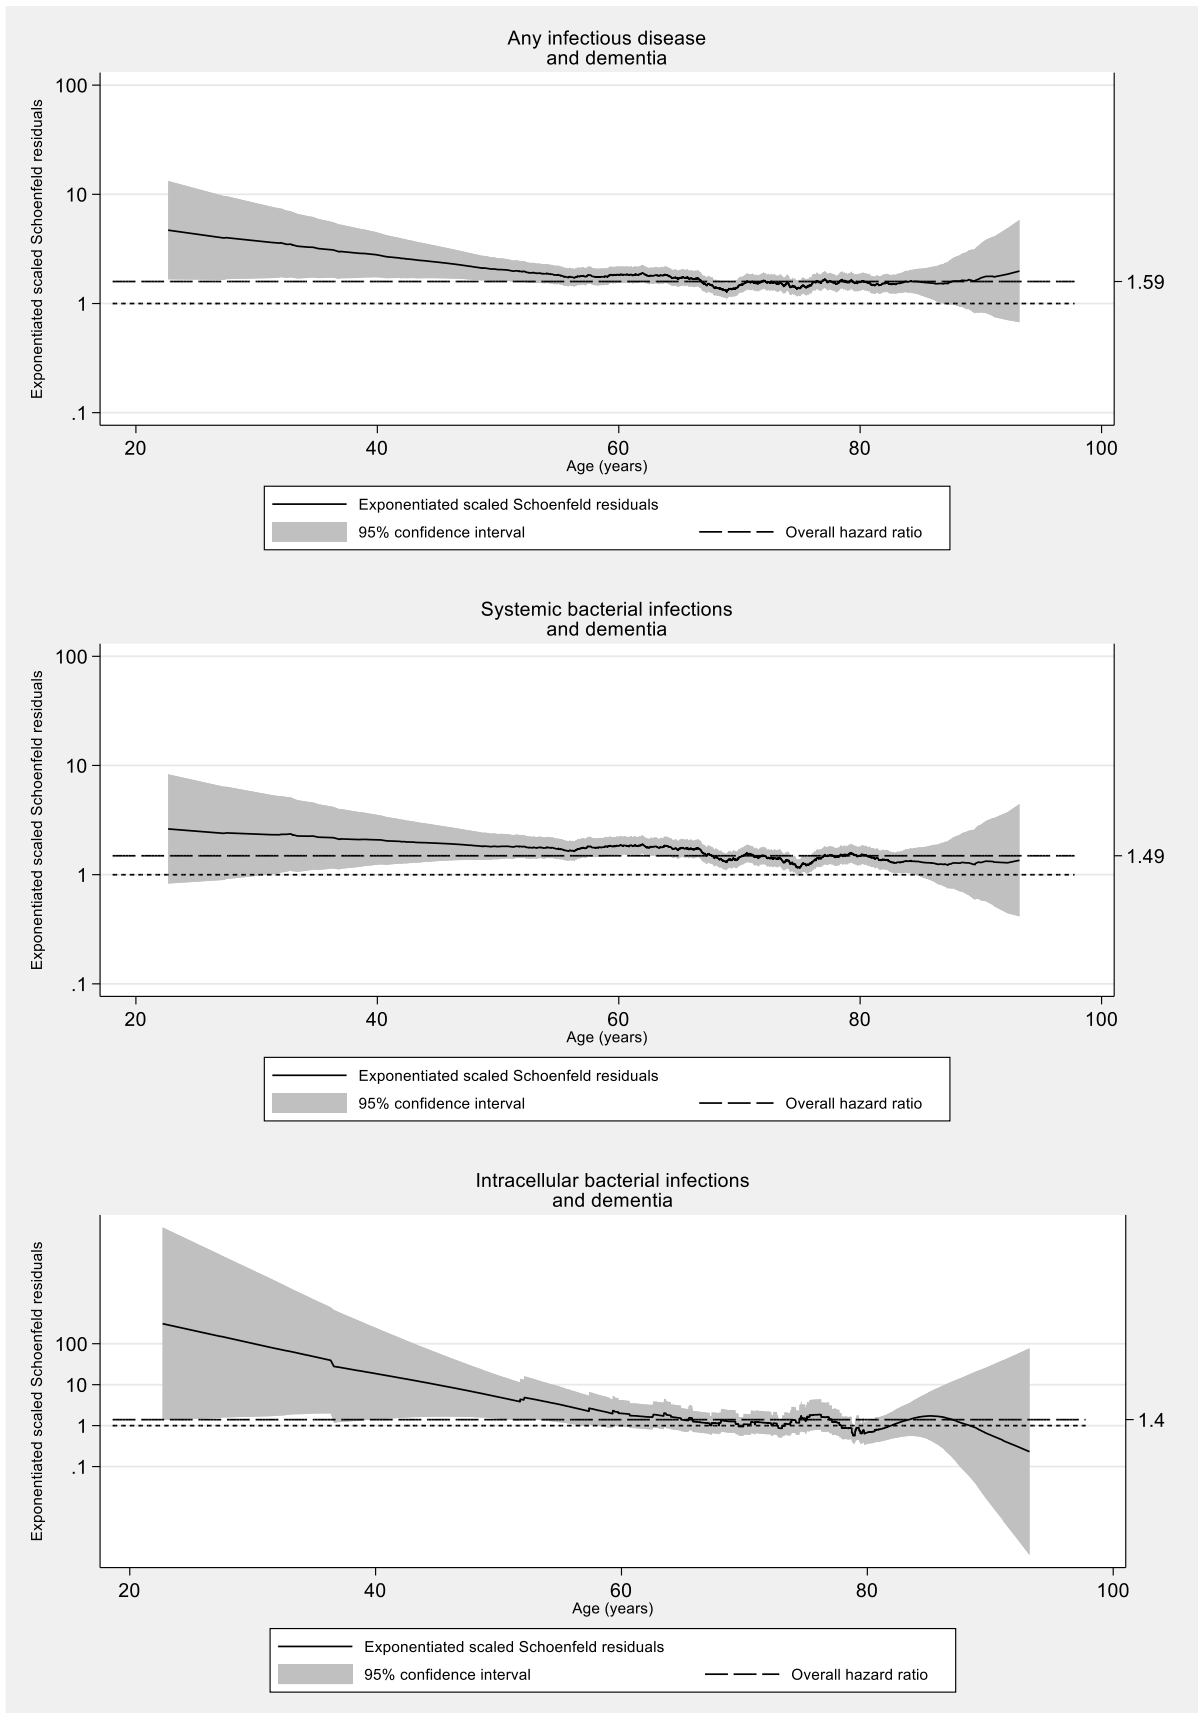



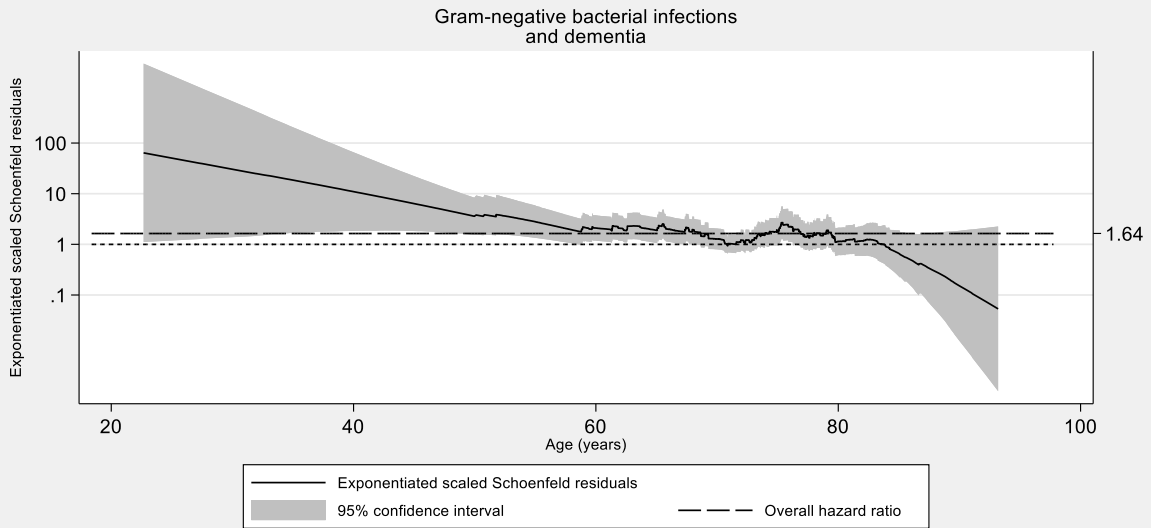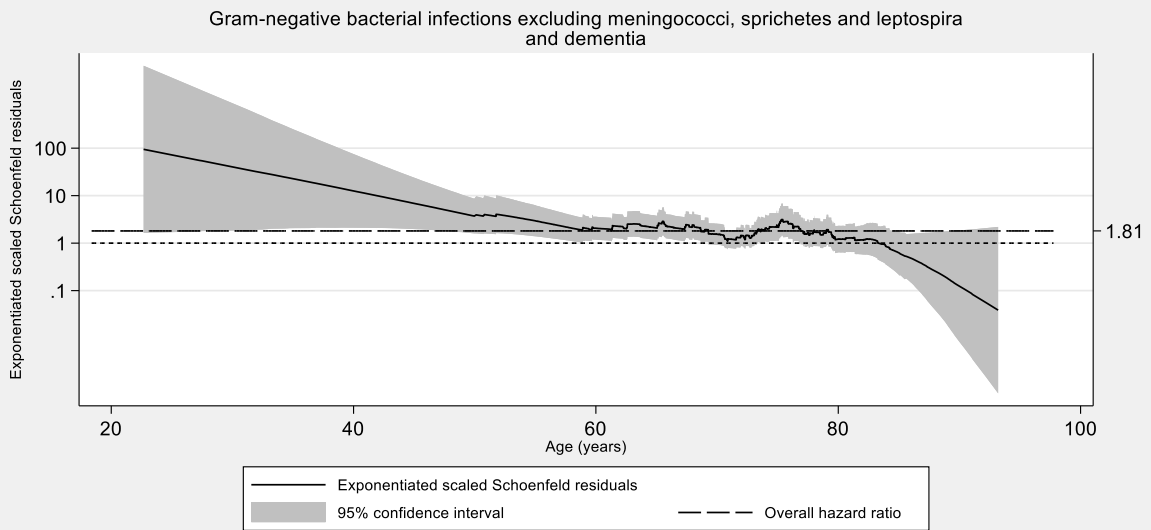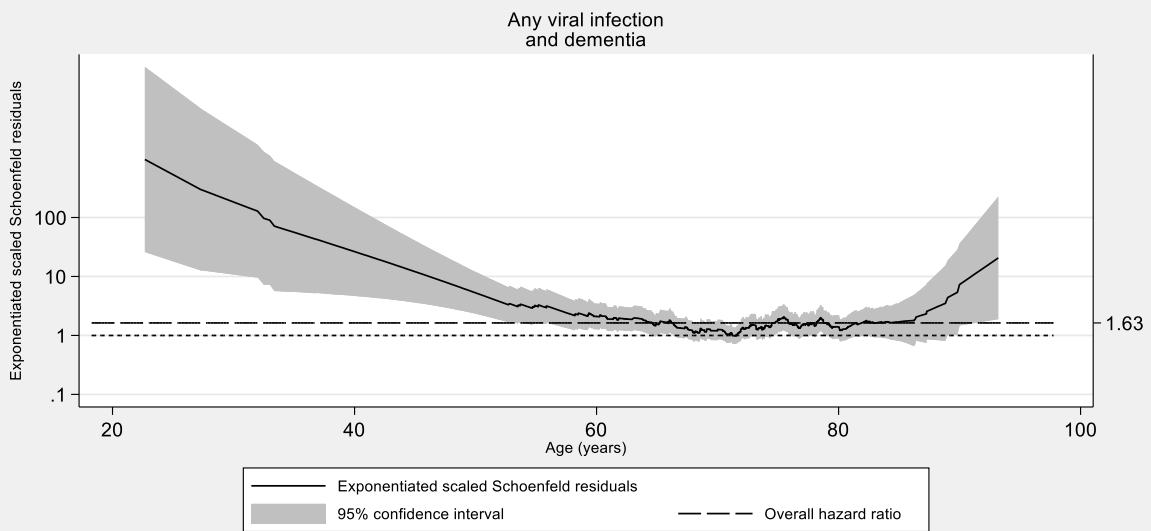

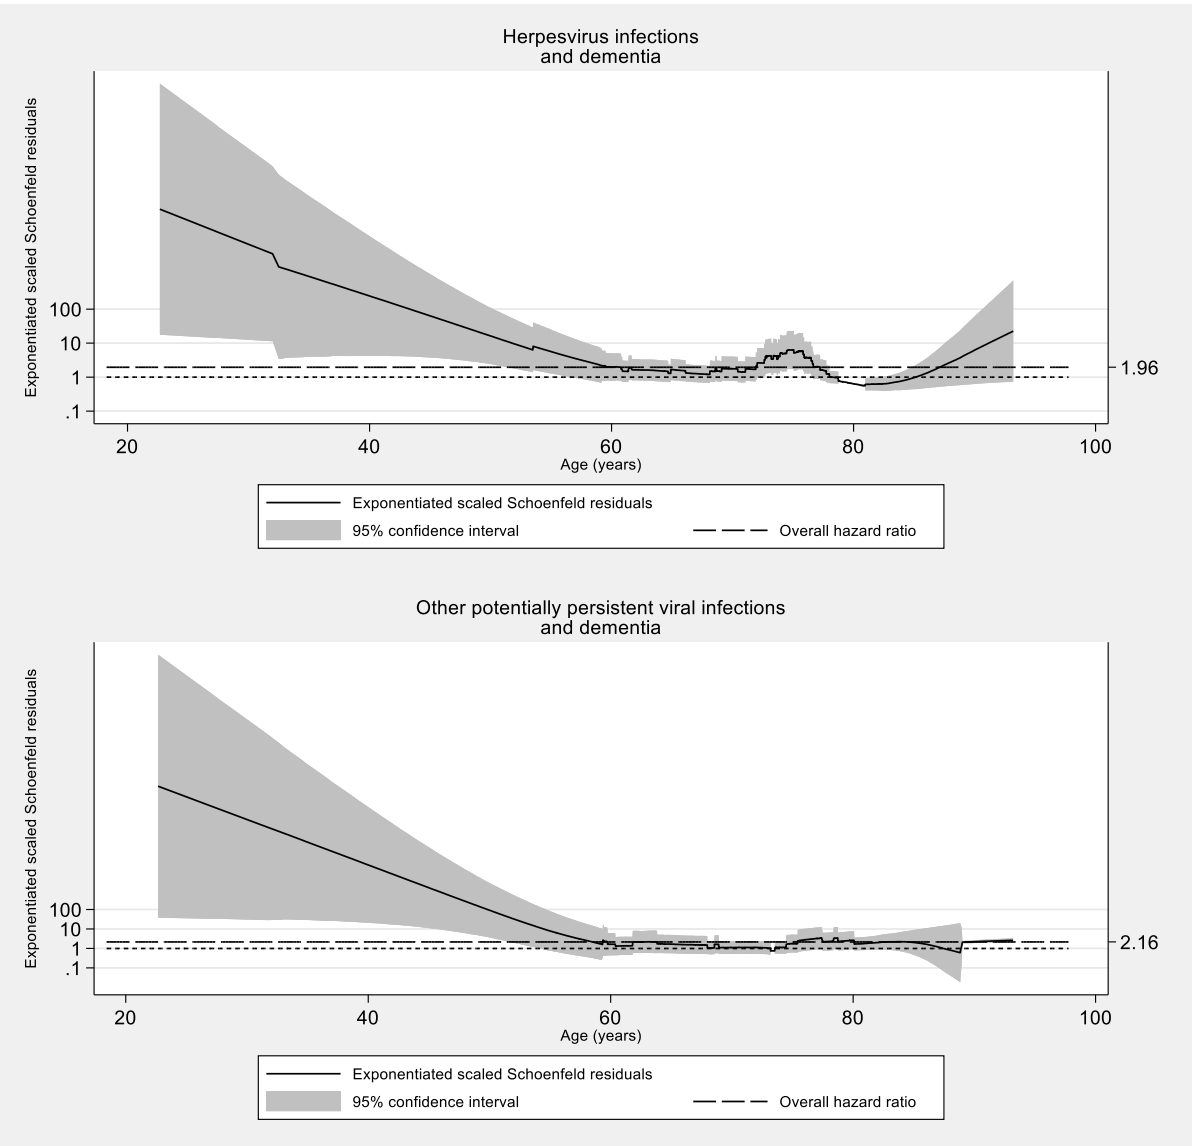

The plots are drawn using symmetric nearest-neighbor smoothing of the scaled Schoenfeld residuals, which can be interpreted as hazard ratios.<sup>1</sup>

**eFigure 3. Dementia follow-up**

**Part A. Dementia follow-up in the main analysis**

**NO DISEASE**

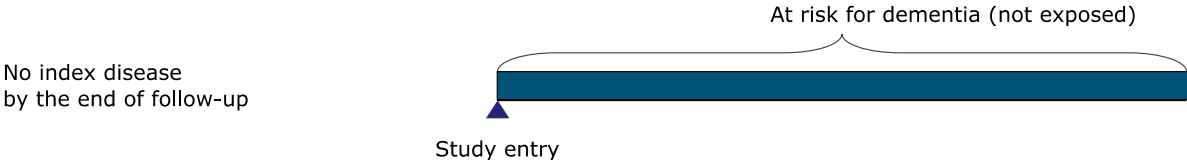

**DISEASE**

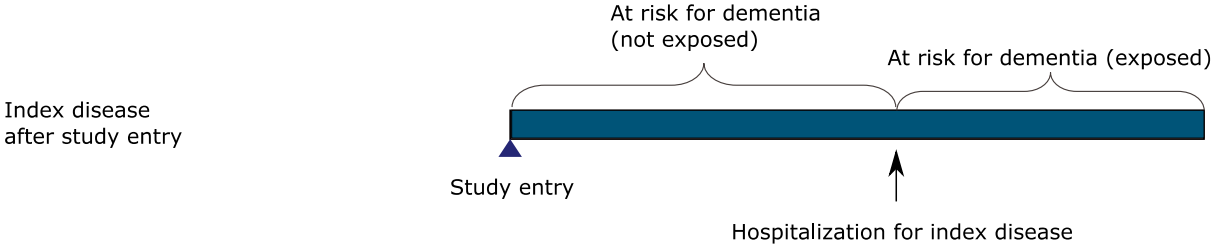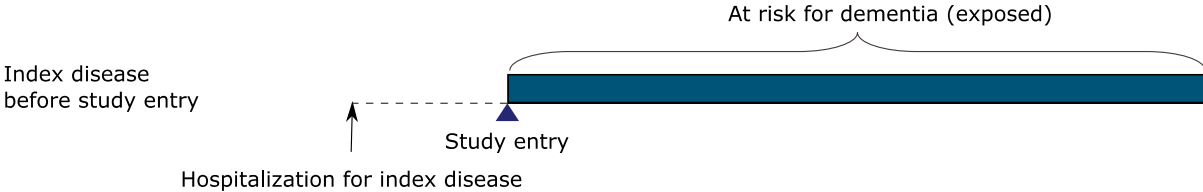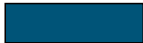

At risk for dementia

Note: Exposure to index disease is modelled as a time-dependent covariate. Age is the time scale.

**Part B. Dementia follow-up from year 10 onwards**

**NO DISEASE**

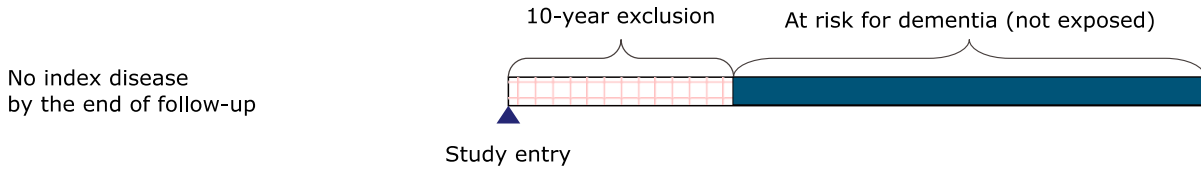

**DISEASE**

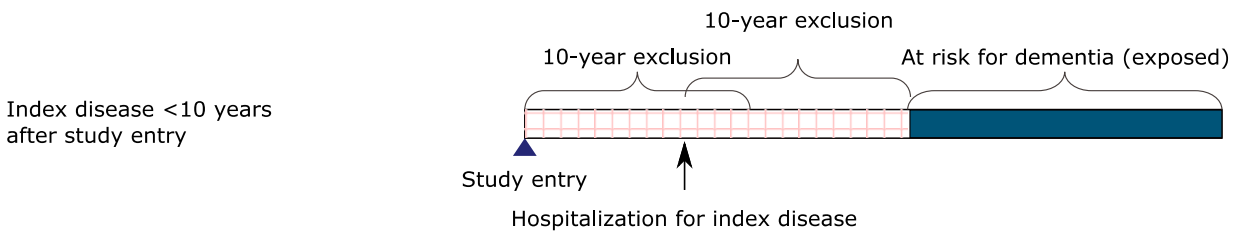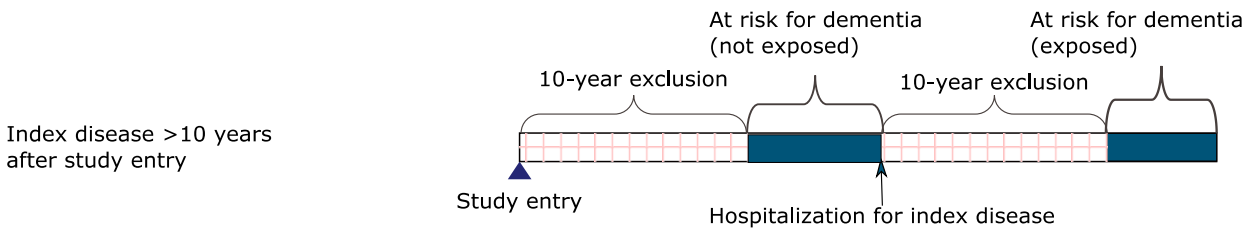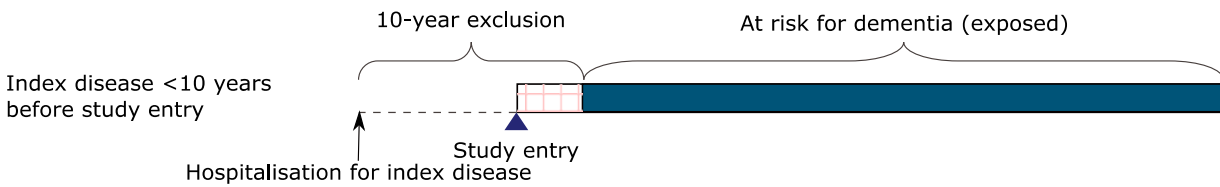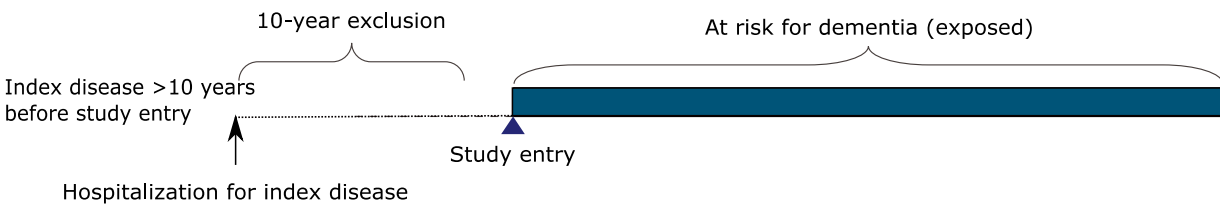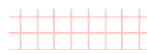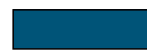

Excluded from follow-up

At risk for dementia

Note: Exposure to index disease is modelled as a time-dependent covariate. Age is the time scale.

eFigure 4. Distribution of age at dementia diagnosis

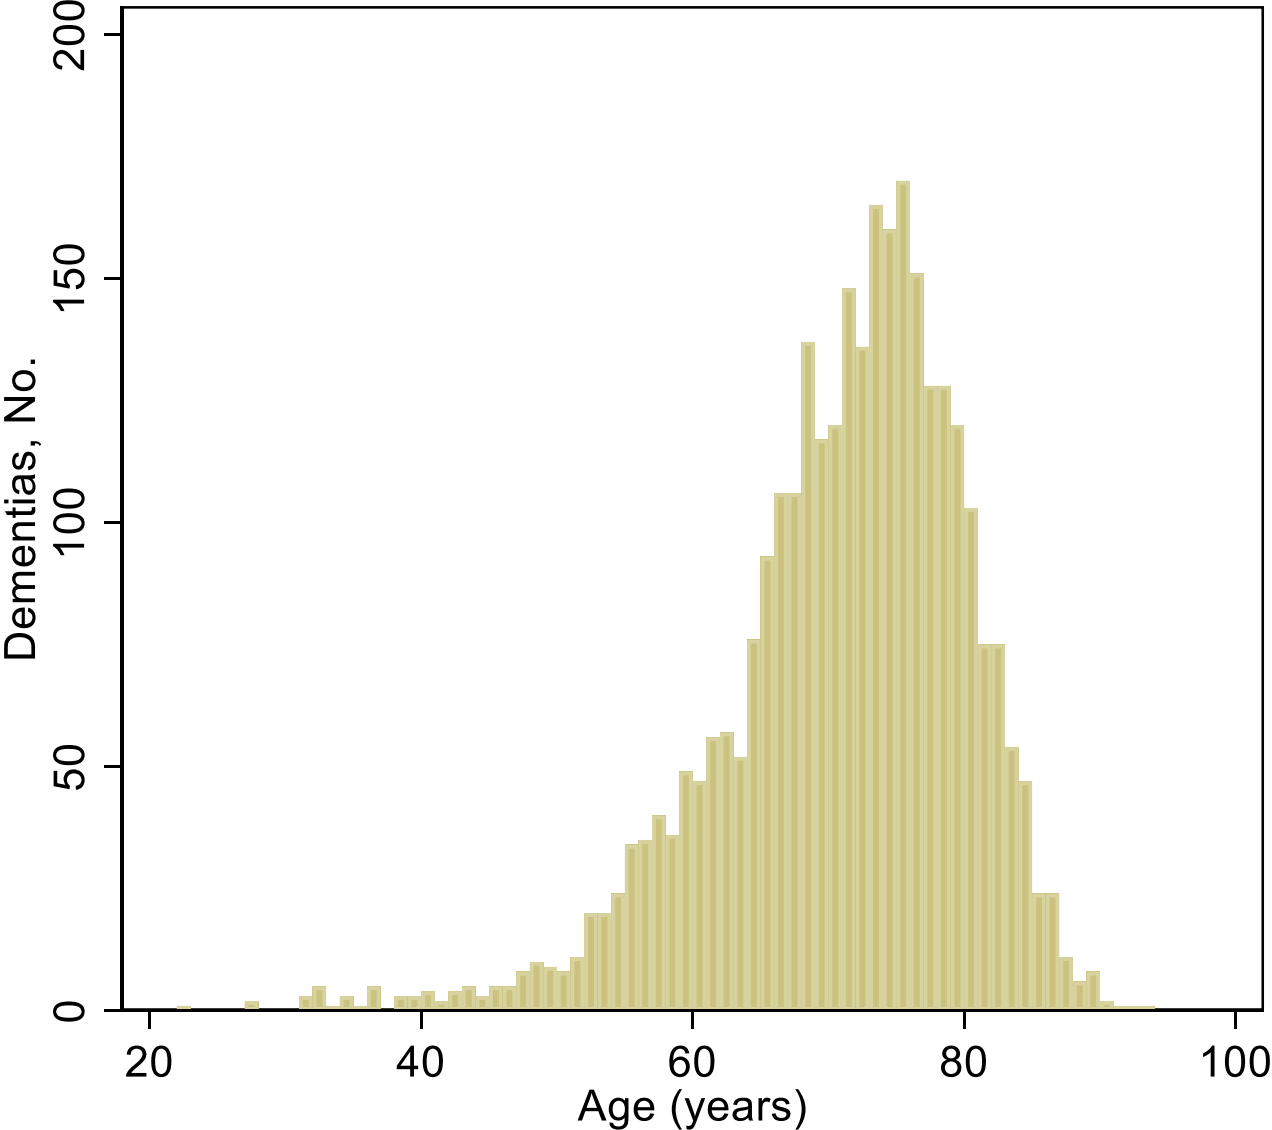

**eTable 1. Classification of hospital-treated infectious diseases in the study on diagnosis level**

| ICD-10 code                    | ICD-10 name                                                                 |
|--------------------------------|-----------------------------------------------------------------------------|
| <b>All infectious diseases</b> |                                                                             |
| A00*                           | Cholera                                                                     |
| A01*                           | Typhoid and paratyphoid fevers                                              |
| A02*                           | Other salmonella infections                                                 |
| A03*                           | Shigellosis                                                                 |
| A04                            | Other bacterial intestinal infections                                       |
| A04.0                          | Enteropathogenic Escherichia coli infection                                 |
| A04.1                          | Enterotoxigenic Escherichia coli infection                                  |
| A04.2                          | Enteroinvasive Escherichia coli infection                                   |
| A04.3                          | Enterohaemorrhagic Escherichia coli infection                               |
| A04.4                          | Other intestinal Escherichia coli infections                                |
| A04.5                          | Campylobacter enteritis                                                     |
| A04.6                          | Enteritis due to Yersinia enterocolitica                                    |
| A04.7                          | Enterocolitis due to Clostridium difficile                                  |
| A04.8                          | Other specified bacterial intestinal infections                             |
| A04.9                          | Bacterial intestinal infection, unspecified                                 |
| A05                            | Other bacterial foodborne intoxications, not elsewhere classified           |
| A05.0                          | Foodborne staphylococcal intoxication                                       |
| A05.1                          | Botulism                                                                    |
| A05.2                          | Foodborne Clostridium perfringens [Clostridium welchii] intoxication        |
| A05.3                          | Foodborne Vibrio parahaemolyticus intoxication                              |
| A05.4                          | Foodborne Bacillus cereus intoxication                                      |
| A05.8                          | Other specified bacterial foodborne intoxications                           |
| A05.9                          | Bacterial foodborne intoxication, unspecified                               |
| A06*                           | Amoebiasis                                                                  |
| A07*                           | Other protozoal intestinal diseases                                         |
| A08                            | Viral and other specified intestinal infections                             |
| A08.0                          | Rotaviral enteritis                                                         |
| A08.1                          | Acute gastroenteropathy due to Norwalk agent                                |
| A08.2                          | Adenoviral enteritis                                                        |
| A08.3                          | Other viral enteritis                                                       |
| A08.4                          | Viral intestinal infection, unspecified                                     |
| A08.5                          | Other specified intestinal infections                                       |
| A09*                           | Other gastroenteritis and colitis of infectious and unspecified origin      |
| A15*                           | Respiratory tuberculosis, bacteriologically and histologically confirmed    |
| A16*                           | Respiratory tuberculosis, not confirmed bacteriologically or histologically |
| A17*                           | Tuberculosis of nervous system                                              |
| A18*                           | Tuberculosis of other organs                                                |
| A19*                           | Miliary tuberculosis                                                        |
| A20*                           | Plague                                                                      |
| A21*                           | Tularaemia                                                                  |
| A22*                           | Anthrax                                                                     |
| A23*                           | Brucellosis                                                                 |
| A24*                           | Glanders and melioidosis                                                    |
| A25*                           | Rat-bite fevers                                                             |
| A26                            | Erysipeloid                                                                 |
| A26.0                          | Cutaneous erysipeloid                                                       |

|       |                                                                       |
|-------|-----------------------------------------------------------------------|
| A26.7 | Erysipelothrix sepsis                                                 |
| A26.8 | Other forms of erysiploid                                             |
| A26.9 | Erysiploid, unspecified                                               |
| A27*  | Leptospirosis                                                         |
| A28   | Other zoonotic bacterial diseases, not elsewhere classified           |
| A28.0 | Pasteurellosis                                                        |
| A28.1 | Cat-scratch disease                                                   |
| A28.2 | Extraintestinal yersiniosis                                           |
| A28.8 | Other specified zoonotic bacterial diseases, not elsewhere classified |
| A28.9 | Zoonotic bacterial disease, unspecified                               |
| A30*  | Leprosy [Hansen disease]                                              |
| A31*  | Infection due to other mycobacteria                                   |
| A32*  | Listeriosis                                                           |
| A33*  | Tetanus neonatorum                                                    |
| A34*  | Obstetrical tetanus                                                   |
| A35*  | Other tetanus                                                         |
| A36*  | Diphtheria                                                            |
| A37*  | Whooping cough                                                        |
| A38*  | Scarlet fever                                                         |
| A39*  | Meningococcal infection                                               |
| A40*  | Streptococcal sepsis                                                  |
| A41   | Other sepsis                                                          |
| A41.0 | Sepsis due to Staphylococcus aureus                                   |
| A41.1 | Sepsis due to other specified staphylococcus                          |
| A41.2 | Sepsis due to unspecified staphylococcus                              |
| A41.3 | Sepsis due to Haemophilus influenzae                                  |
| A41.4 | Sepsis due to anaerobes                                               |
| A41.5 | Sepsis due to other Gram-negative organisms                           |
| A41.8 | Other specified sepsis                                                |
| A41.9 | Sepsis, unspecified                                                   |
| A42*  | Actinomycosis                                                         |
| A43*  | Nocardiosis                                                           |
| A44*  | Bartonellosis                                                         |
| A46*  | Erysipelas                                                            |
| A48.0 | Gas gangrene                                                          |
| A48.1 | Legionnaires disease                                                  |
| A48.2 | Nonpneumonic Legionnaires disease [Pontiac fever]                     |
| A48.3 | Toxic shock syndrome                                                  |
| A48.4 | Brazilian purpuric fever                                              |
| A48.8 | Other specified bacterial diseases                                    |
| A49   | Bacterial infection of unspecified site                               |
| A49.0 | Staphylococcal infection, unspecified site                            |
| A49.1 | Streptococcal infection, unspecified site                             |
| A49.2 | Haemophilus influenzae infection, unspecified site                    |
| A49.3 | Mycoplasma infection, unspecified site                                |
| A49.8 | Other bacterial infections of unspecified site                        |
| A49.9 | Bacterial infection, unspecified                                      |
| A50*  | Congenital syphilis                                                   |
| A51*  | Early syphilis                                                        |
| A52*  | Late syphilis                                                         |
| A53*  | Other and unspecified syphilis                                        |

|       |                                                                                                   |
|-------|---------------------------------------------------------------------------------------------------|
| A54*  | Gonococcal infection                                                                              |
| A54   | Gonococcal infection                                                                              |
| A54.0 | Gonococcal infection of lower genitourinary tract without periurethral or accessory gland abscess |
| A54.1 | Gonococcal infection of lower genitourinary tract with periurethral and accessory gland abscess   |
| A54.2 | Gonococcal pelviperitonitis and other gonococcal genitourinary infections                         |
| A54.3 | Gonococcal infection of eye                                                                       |
| A54.4 | Gonococcal infection of musculoskeletal system                                                    |
| A54.5 | Gonococcal pharyngitis                                                                            |
| A54.6 | Gonococcal infection of anus and rectum                                                           |
| A54.8 | Other gonococcal infections                                                                       |
| A54.9 | Gonococcal infection, unspecified                                                                 |
| A56.0 | Chlamydial infection of lower genitourinary tract                                                 |
| A56.1 | Chlamydial infection of pelviperitoneum and other genitourinary organs                            |
| A56.2 | Chlamydial infection of genitourinary tract, unspecified                                          |
| A56.3 | Chlamydial infection of anus and rectum                                                           |
| A56.4 | Chlamydial infection of pharynx                                                                   |
| A56.8 | Sexually transmitted chlamydial infection of other sites                                          |
| A57*  | Chancroid                                                                                         |
| A58*  | Granuloma inguinale                                                                               |
| A59*  | Trichomoniasis                                                                                    |
| A60*  | Anogenital herpesviral [herpes simplex] infection                                                 |
| A63.0 | Anogenital (venereal) warts                                                                       |
| A63.8 | Other specified predominantly sexually transmitted diseases                                       |
| A64*  | Unspecified sexually transmitted disease                                                          |
| A65*  | Nonvenereal syphilis                                                                              |
| A66*  | Yaws                                                                                              |
| A67*  | Pinta [carate]                                                                                    |
| A68*  | Relapsing fevers                                                                                  |
| A69*  | Other spirochaetal infections                                                                     |
| A70*  | Chlamydia psittaci infection                                                                      |
| A71*  | Trachoma                                                                                          |
| A74.0 | Chlamydial conjunctivitis                                                                         |
| A74.8 | Other chlamydial diseases                                                                         |
| A74.9 | Chlamydial infection, unspecified                                                                 |
| A75*  | Typhus fever                                                                                      |
| A77*  | Spotted fever [tick-borne rickettsioses]                                                          |
| A78*  | Q fever                                                                                           |
| A79*  | Other rickettsioses                                                                               |
| A80   | Acute poliomyelitis                                                                               |
| A81.2 | Progressive multifocal leukoencephalopathy                                                        |
| A83*  | Mosquito-borne viral encephalitis                                                                 |
| A84*  | Tick-borne viral encephalitis                                                                     |
| A85*  | Other viral encephalitis, not elsewhere classified                                                |
| A86*  | Unspecified viral encephalitis                                                                    |
| A87*  | Viral meningitis                                                                                  |
| A88*  | Other viral infections of central nervous system, not elsewhere classified                        |
| A89*  | Unspecified viral infection of central nervous system                                             |
| A90*  | Dengue fever [classical dengue]                                                                   |
| A91*  | Dengue haemorrhagic fever                                                                         |
| A92*  | Other mosquito-borne viral fevers                                                                 |
| A93*  | Other arthropod-borne viral fevers, not elsewhere classified                                      |



|      |                                                                                                    |
|------|----------------------------------------------------------------------------------------------------|
| A94* | Unspecified arthropod-borne viral fever                                                            |
| A95* | Yellow fever                                                                                       |
| A96* | Arenaviral haemorrhagic fever                                                                      |
| A97* | Dengue                                                                                             |
| A98* | Other viral haemorrhagic fevers, not elsewhere classified                                          |
| A99* | Unspecified viral haemorrhagic fever                                                               |
| B00* | Herpesviral [herpes simplex] infections                                                            |
| B01* | Varicella [chickenpox]                                                                             |
| B02* | Zoster [herpes zoster]                                                                             |
| B03* | Smallpox                                                                                           |
| B04* | Monkeypox                                                                                          |
| B05* | Measles                                                                                            |
| B06* | Rubella [German measles]                                                                           |
| B07* | Viral warts                                                                                        |
| B08* | Other viral infections characterized by skin and mucous membrane lesions, not elsewhere classified |
| B09* | Unspecified viral infection characterized by skin and mucous membrane lesions                      |
| B15* | Acute hepatitis A                                                                                  |
| B16* | Acute hepatitis B                                                                                  |
| B17* | Other acute viral hepatitis                                                                        |
| B18* | Chronic viral hepatitis                                                                            |
| B19* | Unspecified viral hepatitis                                                                        |
| B20* | Human immunodeficiency virus [HIV] disease resulting in infectious and parasitic diseases          |
| B21* | Human immunodeficiency virus [HIV] disease resulting in malignant neoplasms                        |
| B22* | Human immunodeficiency virus [HIV] disease resulting in other specified diseases                   |
| B23* | Human immunodeficiency virus [HIV] disease resulting in other conditions                           |
| B24* | Unspecified human immunodeficiency virus [HIV] disease                                             |
| B25* | Cytomegaloviral disease                                                                            |
| B27* | Infectious mononucleosis                                                                           |
| B30* | Viral conjunctivitis                                                                               |
| B33* | Other viral diseases, not elsewhere classified                                                     |
| B34* | Viral infection of unspecified site                                                                |
| B35* | Dermatophytosis                                                                                    |
| B36* | Other superficial mycoses                                                                          |
| B37* | Candidiasis                                                                                        |
| B38* | Coccidioidomycosis                                                                                 |
| B39* | Histoplasmosis                                                                                     |
| B40* | Blastomycosis                                                                                      |
| B41* | Paracoccidioidomycosis                                                                             |
| B42* | Sporotrichosis                                                                                     |
| B43* | Chromomycosis and phaeomycotic abscess                                                             |
| B44* | Aspergillosis                                                                                      |
| B45* | Cryptococcosis                                                                                     |
| B46* | Zygomycosis                                                                                        |
| B47* | Mycetoma                                                                                           |
| B48* | Other mycoses, not elsewhere classified                                                            |
| B49* | Unspecified mycosis                                                                                |
| B50* | Plasmodium falciparum malaria                                                                      |
| B51* | Plasmodium vivax malaria                                                                           |
| B52* | Plasmodium malariae malaria                                                                        |
| B53* | Other parasitologically confirmed malaria                                                          |
| B54* | Unspecified malaria                                                                                |

|       |                                                                                                |
|-------|------------------------------------------------------------------------------------------------|
| B55*  | Leishmaniasis                                                                                  |
| B56*  | African trypanosomiasis                                                                        |
| B57*  | Chagas disease                                                                                 |
| B58*  | Toxoplasmosis                                                                                  |
| B59*  | Pneumocystosis                                                                                 |
| B60*  | Other protozoal diseases, not elsewhere classified                                             |
| B64*  | Unspecified protozoal disease                                                                  |
| B65*  | Schistosomiasis [bilharziasis]                                                                 |
| B66*  | Other fluke infections                                                                         |
| B67*  | Echinococcosis                                                                                 |
| B68*  | Taeniasis                                                                                      |
| B69*  | Cysticercosis                                                                                  |
| B70*  | Diphyllobothriasis and sparganosis                                                             |
| B71*  | Other cestode infections                                                                       |
| B72*  | Dracunculiasis                                                                                 |
| B73*  | Onchocerciasis                                                                                 |
| B74*  | Filariasis                                                                                     |
| B75*  | Trichinellosis                                                                                 |
| B76*  | Hookworm diseases                                                                              |
| B77*  | Ascariasis                                                                                     |
| B78*  | Strongyloidiasis                                                                               |
| B79*  | Trichuriasis                                                                                   |
| B80*  | Enterobiasis                                                                                   |
| B81*  | Other intestinal helminthiases, not elsewhere classified                                       |
| B82*  | Unspecified intestinal parasitism                                                              |
| B83*  | Other helminthiases                                                                            |
| B85*  | Pediculosis and phthiriasis                                                                    |
| B86*  | Scabies                                                                                        |
| B87*  | Myiasis                                                                                        |
| B88*  | Other infestations                                                                             |
| B89*  | Unspecified parasitic disease                                                                  |
| B95*  | Streptococcus and staphylococcus as the cause of diseases classified to other chapters         |
| B96.0 | Mycoplasma pneumoniae [M. pneumoniae] as the cause of diseases classified to other chapters    |
| B96.1 | Klebsiella pneumoniae [K. pneumoniae] as the cause of diseases classified to other chapters    |
| B96.2 | Escherichia coli [E. coli] as the cause of diseases classified to other chapters               |
| B96.3 | Haemophilus influenzae [H. influenzae] as the cause of diseases classified to other chapters   |
| B96.4 | Proteus (mirabilis)(morganii) as the cause of diseases classified to other chapters            |
| B96.5 | Pseudomonas (aeruginosa) as the cause of diseases classified to other chapters                 |
| B96.6 | Bacillus fragilis [B. fragilis] as the cause of diseases classified to other chapters          |
| B96.7 | Clostridium perfringens [C. perfringens] as the cause of diseases classified to other chapters |
| B96.8 | Other specified bacterial agents as the cause of diseases classified to other chapters         |
| B97*  | Viral agents as the cause of diseases classified to other chapters                             |
| B98.0 | Helicobacter pylori [H.pylori] as the cause of diseases classified to other chapters           |
| B98.1 | Vibrio vulnificus as the cause of diseases classified to other chapters                        |
| B99*  | Other and unspecified infectious diseases                                                      |
| D73.3 | Abscess of spleen                                                                              |
| E32.1 | Abscess of thymus                                                                              |
| G00   | Bacterial meningitis, not elsewhere classified                                                 |
| G00.0 | Haemophilus meningitis                                                                         |
| G00.1 | Pneumococcal meningitis                                                                        |
| G00.2 | Streptococcal meningitis                                                                       |

|       |                                                                                                              |
|-------|--------------------------------------------------------------------------------------------------------------|
| G00.3 | Staphylococcal meningitis                                                                                    |
| G00.8 | Other bacterial meningitis                                                                                   |
| G00.9 | Bacterial meningitis, unspecified                                                                            |
| G01*  | Meningitis in bacterial diseases classified elsewhere                                                        |
| G02.0 | Meningitis in viral diseases classified elsewhere                                                            |
| G02.1 | Meningitis in mycoses                                                                                        |
| G02.8 | Meningitis in other specified infectious and parasitic diseases classified elsewhere                         |
| G03*  | Meningitis due to other and unspecified causes                                                               |
| G04.1 | Tropical spastic paraplegia                                                                                  |
| G04.2 | Bacterial meningoencephalitis and meningomyelitis, not elsewhere classified                                  |
| G05.0 | Encephalitis, myelitis and encephalomyelitis in bacterial diseases classified elsewhere                      |
| G05.1 | Encephalitis, myelitis and encephalomyelitis in viral diseases classified elsewhere                          |
| G05.2 | Encephalitis, myelitis and encephalomyelitis in other infectious and parasitic diseases classified elsewhere |
| G06*  | Intracranial and intraspinal abscess and granuloma                                                           |
| G07*  | Intracranial and intraspinal abscess and granuloma in diseases classified elsewhere                          |
| H00*  | Hordeolum and chalazion                                                                                      |
| H01.0 | Blepharitis                                                                                                  |
| H05.0 | Acute inflammation of orbit                                                                                  |
| H06.1 | Parasitic infestation of orbit in diseases classified elsewhere                                              |
| H10.0 | Mucopurulent conjunctivitis                                                                                  |
| H10.5 | Blepharoconjunctivitis                                                                                       |
| H13.0 | Filarial infection of conjunctiva                                                                            |
| H19.0 | Scleritis and episcleritis in diseases classified elsewhere                                                  |
| H19.1 | Herpesviral keratitis and keratoconjunctivitis                                                               |
| H19.2 | Keratitis and keratoconjunctivitis in other infectious and parasitic diseases classified elsewhere           |
| H22.0 | Iridocyclitis in infectious and parasitic diseases classified elsewhere                                      |
| H32.0 | Chorioretinal inflammation in infectious and parasitic diseases classified elsewhere                         |
| H44.0 | Purulent endophthalmitis                                                                                     |
| H60.0 | Abscess of external ear                                                                                      |
| H60.1 | Cellulitis of external ear                                                                                   |
| H60.2 | Malignant otitis externa                                                                                     |
| H60.3 | Other infective otitis externa                                                                               |
| H62.0 | Otitis externa in bacterial diseases classified elsewhere                                                    |
| H62.1 | Otitis externa in viral diseases classified elsewhere                                                        |
| H62.2 | Otitis externa in mycoses                                                                                    |
| H62.3 | Otitis externa in other infectious and parasitic diseases classified elsewhere                               |
| H62.3 | Otitis externa in other infectious and parasitic diseases classified elsewhere                               |
| H66.0 | Acute suppurative otitis media                                                                               |
| H67.0 | Otitis media in bacterial diseases classified elsewhere                                                      |
| H67.1 | Otitis media in viral diseases classified elsewhere                                                          |
| H70.0 | Acute mastoiditis                                                                                            |
| H75.0 | Mastoiditis in infectious and parasitic diseases classified elsewhere                                        |
| I30.1 | Infective pericarditis                                                                                       |
| I32.0 | Pericarditis in bacterial diseases classified elsewhere                                                      |
| I32.1 | Pericarditis in other infectious and parasitic diseases classified elsewhere                                 |
| I33.0 | Acute and subacute infective endocarditis                                                                    |
| I40.0 | Infective myocarditis                                                                                        |
| I41.0 | Myocarditis in bacterial diseases classified elsewhere                                                       |
| I41.1 | Myocarditis in viral diseases classified elsewhere                                                           |
| I42.1 | Obstructive hypertrophic cardiomyopathy                                                                      |
| I43.0 | Cardiomyopathy in infectious and parasitic diseases classified elsewhere                                     |

|       |                                                                                       |
|-------|---------------------------------------------------------------------------------------|
| I52.0 | Other heart disorders in bacterial diseases classified elsewhere                      |
| I52.1 | Other heart disorders in other infectious and parasitic diseases classified elsewhere |
| J01.0 | Acute maxillary sinusitis                                                             |
| J02   | Acute pharyngitis                                                                     |
| J02.0 | Streptococcal pharyngitis                                                             |
| J02.8 | Acute pharyngitis due to other specified organisms                                    |
| J02.9 | Acute pharyngitis, unspecified                                                        |
| J03   | Acute tonsillitis                                                                     |
| J03.0 | Streptococcal tonsillitis                                                             |
| J03.8 | Acute tonsillitis due to other specified organisms                                    |
| J03.9 | Acute tonsillitis, unspecified                                                        |
| J04*  | Acute laryngitis and tracheitis                                                       |
| J05.0 | Acute obstructive laryngitis [croup]                                                  |
| J05.1 | Acute epiglottitis                                                                    |
| J09*  | Influenza due to certain identified influenza virus                                   |
| J10*  | Influenza due to other identified influenza virus                                     |
| J11*  | Influenza, virus not identified                                                       |
| J12*  | Viral pneumonia, not elsewhere classified                                             |
| J13*  | Pneumonia due to <i>Streptococcus pneumoniae</i>                                      |
| J14*  | Pneumonia due to <i>Haemophilus influenzae</i>                                        |
| J15   | Bacterial pneumonia, not elsewhere classified                                         |
| J15.0 | Pneumonia due to <i>Klebsiella pneumoniae</i>                                         |
| J15.1 | Pneumonia due to <i>Pseudomonas</i>                                                   |
| J15.2 | Pneumonia due to staphylococcus                                                       |
| J15.3 | Pneumonia due to streptococcus, group B                                               |
| J15.4 | Pneumonia due to other streptococci                                                   |
| J15.5 | Pneumonia due to <i>Escherichia coli</i>                                              |
| J15.6 | Pneumonia due to other aerobic Gram-negative bacteria                                 |
| J15.7 | Pneumonia due to <i>Mycoplasma pneumoniae</i>                                         |
| J15.8 | Other bacterial pneumonia                                                             |
| J15.9 | Bacterial pneumonia, unspecified                                                      |
| J16   | Pneumonia due to other infectious organisms, not elsewhere classified                 |
| J16.0 | Chlamydial pneumonia                                                                  |
| J16.8 | Pneumonia due to other specified infectious organisms                                 |
| J17   | Pneumonia in diseases classified elsewhere                                            |
| J17.0 | Pneumonia in bacterial diseases classified elsewhere                                  |
| J17.1 | Pneumonia in viral diseases classified elsewhere                                      |
| J17.2 | Pneumonia in mycoses                                                                  |
| J17.3 | Pneumonia in parasitic diseases                                                       |
| J17.8 | Pneumonia in other diseases classified elsewhere                                      |
| J18*  | Pneumonia, organism unspecified                                                       |
| J20   | Acute bronchitis                                                                      |
| J20.0 | Acute bronchitis due to <i>Mycoplasma pneumoniae</i>                                  |
| J20.1 | Acute bronchitis due to <i>Haemophilus influenzae</i>                                 |
| J20.2 | Acute bronchitis due to streptococcus                                                 |
| J20.3 | Acute bronchitis due to coxsackievirus                                                |
| J20.4 | Acute bronchitis due to parainfluenza virus                                           |
| J20.5 | Acute bronchitis due to respiratory syncytial virus                                   |
| J20.6 | Acute bronchitis due to rhinovirus                                                    |
| J20.7 | Acute bronchitis due to echovirus                                                     |
| J20.8 | Acute bronchitis due to other specified organisms                                     |

|       |                                                                                     |
|-------|-------------------------------------------------------------------------------------|
| J20.9 | Acute bronchitis, unspecified                                                       |
| J21*  | Acute bronchiolitis                                                                 |
| J21.0 | Acute bronchiolitis due to respiratory syncytial virus                              |
| J21.1 | Acute bronchiolitis due to human metapneumovirus                                    |
| J21.8 | Acute bronchiolitis due to other specified organisms                                |
| J21.9 | Acute bronchiolitis, unspecified                                                    |
| J22*  | Unspecified acute lower respiratory infection                                       |
| J36*  | Peritonsillar abscess                                                               |
| J39.0 | Retropharyngeal and parapharyngeal abscess                                          |
| J39.1 | Other abscess of pharynx                                                            |
| J85.1 | Abscess of lung with pneumonia                                                      |
| J85.2 | Abscess of lung without pneumonia                                                   |
| J85.3 | Abscess of mediastinum                                                              |
| J86*  | Pyothorax                                                                           |
| K02*  | Dental caries                                                                       |
| K04.4 | Acute apical periodontitis of pulpal origin                                         |
| K04.5 | Chronic apical periodontitis                                                        |
| K04.6 | Periapical abscess with sinus                                                       |
| K04.7 | Periapical abscess without sinus                                                    |
| K05.0 | Acute gingivitis                                                                    |
| K05.2 | Acute periodontitis                                                                 |
| K05.3 | Chronic periodontitis                                                               |
| K05.4 | Periodontosis                                                                       |
| K11.3 | Abscess of salivary gland                                                           |
| K12.2 | Cellulitis and abscess of mouth                                                     |
| K23.0 | Tuberculous oesophagitis                                                            |
| K23.1 | Megaoesophagus in Chagas disease                                                    |
| K35*  | Acute appendicitis                                                                  |
| K57.0 | Diverticular disease of small intestine with perforation and abscess                |
| K57.2 | Diverticular disease of large intestine with perforation and abscess                |
| K57.4 | Diverticular disease of both small and large intestine with perforation and abscess |
| K57.8 | Diverticular disease of intestine, part unspecified, with perforation and abscess   |
| K61*  | Abscess of anal and rectal regions                                                  |
| K63.0 | Abscess of intestine                                                                |
| K65.0 | Acute peritonitis                                                                   |
| K67.0 | Chlamydial peritonitis                                                              |
| K67.1 | Gonococcal peritonitis                                                              |
| K67.2 | Syphilitic peritonitis                                                              |
| K67.3 | Tuberculous peritonitis                                                             |
| K67.8 | Other disorders of peritoneum in infectious diseases classified elsewhere           |
| K75.0 | Abscess of liver                                                                    |
| K77.0 | Liver disorders in infectious and parasitic diseases classified elsewhere           |
| L00*  | Staphylococcal scalded skin syndrome                                                |
| L01*  | Impetigo                                                                            |
| L02*  | Cutaneous abscess, furuncle and carbuncle                                           |
| L03*  | Cellulitis                                                                          |
| L04*  | Acute lymphadenitis                                                                 |
| L05*  | Pilonidal cyst                                                                      |
| L08*  | Other local infections of skin and subcutaneous tissue                              |
| L70.1 | Acne conglobata                                                                     |
| M00   | Pyogenic arthritis                                                                  |

|       |                                                                                                |
|-------|------------------------------------------------------------------------------------------------|
| M00.0 | Staphylococcal arthritis and polyarthritis                                                     |
| M00.1 | Pneumococcal arthritis and polyarthritis                                                       |
| M00.2 | Other streptococcal arthritis and polyarthritis                                                |
| M00.8 | Arthritis and polyarthritis due to other specified bacterial agents                            |
| M00.9 | Pyogenic arthritis, unspecified                                                                |
| M01.0 | Meningococcal arthritis                                                                        |
| M01.1 | Tuberculous arthritis                                                                          |
| M01.2 | Arthritis in Lyme disease                                                                      |
| M01.3 | Arthritis in other bacterial diseases classified elsewhere                                     |
| M01.4 | Rubella arthritis                                                                              |
| M01.5 | Arthritis in other viral diseases classified elsewhere                                         |
| M01.6 | Arthritis in mycoses                                                                           |
| M01.8 | Arthritis in other infectious and parasitic diseases classified elsewhere                      |
| M46.2 | Osteomyelitis of vertebra                                                                      |
| M46.3 | Infection of intervertebral disc (pyogenic)                                                    |
| M46.5 | Other infective spondylopathies                                                                |
| M49.0 | Tuberculosis of spine                                                                          |
| M49.1 | Brucella spondylitis                                                                           |
| M49.2 | Enterobacterial spondylitis                                                                    |
| M49.3 | Spondylopathy in other infectious and parasitic diseases classified elsewhere                  |
| M60.0 | Infective myositis                                                                             |
| M63.0 | Myositis in bacterial diseases classified elsewhere                                            |
| M63.1 | Myositis in protozoal and parasitic infections classified elsewhere                            |
| M63.2 | Myositis in other infectious diseases classified elsewhere                                     |
| M65.0 | Abscess of tendon sheath                                                                       |
| M65.1 | Other infective (teno)synovitis                                                                |
| M71.0 | Abscess of bursa                                                                               |
| M71.1 | Other infective bursitis                                                                       |
| M73.0 | Gonococcal bursitis                                                                            |
| M73.1 | Syphilitic bursitis                                                                            |
| M86*  | Osteomyelitis                                                                                  |
| N10*  | Acute tubulo-interstitial nephritis                                                            |
| N13.6 | Pyonephrosis                                                                                   |
| N15.1 | Renal and perinephric abscess                                                                  |
| N16.0 | Renal tubulo-interstitial disorders in infectious and parasitic diseases classified elsewhere  |
| N29.0 | Late syphilis of kidney                                                                        |
| N29.1 | Other disorders of kidney and ureter in infectious and parasitic diseases classified elsewhere |
| N30.0 | Acute cystitis                                                                                 |
| N34.0 | Urethral abscess                                                                               |
| N39.0 | Urinary tract infection, site not specified                                                    |
| N41.0 | Acute prostatitis                                                                              |
| N41.2 | Abscess of prostate                                                                            |
| N45*  | Orchitis and epididymitis                                                                      |
| N61*  | Inflammatory disorders of breast                                                               |
| N70.0 | Acute salpingitis and oophoritis                                                               |
| N71.0 | Acute inflammatory disease of uterus                                                           |
| N73.0 | Acute parametritis and pelvic cellulitis                                                       |
| N73.3 | Female acute pelvic peritonitis                                                                |
| N74   | Female pelvic inflammatory disorders in diseases classified elsewhere                          |
| N74.0 | Tuberculous infection of cervix uteri                                                          |
| N74.1 | Female tuberculous pelvic inflammatory disease                                                 |

|       |                                                                                                                             |
|-------|-----------------------------------------------------------------------------------------------------------------------------|
| N74.2 | Female syphilitic pelvic inflammatory disease                                                                               |
| N74.3 | Female gonococcal pelvic inflammatory disease                                                                               |
| N74.4 | Female chlamydial pelvic inflammatory disease                                                                               |
| N74.8 | Female pelvic inflammatory disorders in other diseases classified elsewhere                                                 |
| N75.1 | Abscess of Bartholin gland                                                                                                  |
| N76.0 | Acute vaginitis                                                                                                             |
| N76.2 | Acute vulvitis                                                                                                              |
| N76.4 | Abscess of vulva                                                                                                            |
| N77.0 | Ulceration of vulva in infectious and parasitic diseases classified elsewhere                                               |
| N77.1 | Vaginitis, vulvitis and vulvovaginitis in infectious and parasitic diseases classified elsewhere                            |
| O03.0 | Spontaneous abortion: Incomplete, complicated by genital tract and pelvic infection                                         |
| O03.5 | Spontaneous abortion: Complete or unspecified, complicated by genital tract and pelvic infection                            |
| O04.0 | Medical abortion: Incomplete, complicated by genital tract and pelvic infection                                             |
| O04.5 | Medical abortion: Complete or unspecified, complicated by genital tract and pelvic infection                                |
| O05.0 | Other abortion: Incomplete, complicated by genital tract and pelvic infection                                               |
| O05.5 | Other abortion: Complete or unspecified, complicated by genital tract and pelvic infection                                  |
| O06.0 | Unspecified abortion: Incomplete, complicated by genital tract and pelvic infection                                         |
| O06.5 | Unspecified abortion: Complete or unspecified, complicated by genital tract and pelvic infection                            |
| O07.0 | Failed medical abortion, complicated by genital tract and pelvic infection                                                  |
| O07.5 | Other and unspecified failed attempted abortion, complicated by genital tract and pelvic infection                          |
| O08.0 | Genital tract and pelvic infection following abortion and ectopic and molar pregnancy                                       |
| O23.0 | Infections of kidney in pregnancy                                                                                           |
| O23.1 | Infections of bladder in pregnancy                                                                                          |
| O23.2 | Infections of urethra in pregnancy                                                                                          |
| O23.3 | Infections of other parts of urinary tract in pregnancy                                                                     |
| O23.4 | Unspecified infection of urinary tract in pregnancy                                                                         |
| O23.5 | Infections of the genital tract in pregnancy                                                                                |
| O23.9 | Other and unspecified genitourinary tract infection in pregnancy                                                            |
| O26.4 | Herpes gestationis                                                                                                          |
| O75.3 | Other infection during labour                                                                                               |
| O85*  | Puerperal sepsis                                                                                                            |
| O86*  | Other puerperal infections                                                                                                  |
| O86*  | Other puerperal infections                                                                                                  |
| O91.0 | Infection of nipple associated with childbirth                                                                              |
| O91.1 | Abscess of breast associated with childbirth                                                                                |
| O98   | Maternal infectious and parasitic diseases classifiable elsewhere but complicating pregnancy, childbirth and the puerperium |
| O98.0 | Tuberculosis complicating pregnancy, childbirth and the puerperium                                                          |
| O98.1 | Syphilis complicating pregnancy, childbirth and the puerperium                                                              |
| O98.2 | Gonorrhoea complicating pregnancy, childbirth and the puerperium                                                            |
| O98.3 | Other infections with a predominantly sexual mode of transmission complicating pregnancy, childbirth and the puerperium     |
| O98.4 | Viral hepatitis complicating pregnancy, childbirth and the puerperium                                                       |
| O98.5 | Other viral diseases complicating pregnancy, childbirth and the puerperium                                                  |
| O98.6 | Protozoal diseases complicating pregnancy, childbirth and the puerperium                                                    |
| O98.7 | Human immunodeficiency virus [HIV] disease complicating pregnancy, childbirth and the puerperium                            |
| O98.8 | Other maternal infectious and parasitic diseases complicating pregnancy, childbirth and the puerperium                      |
| O98.9 | Unspecified maternal infectious or parasitic disease complicating pregnancy, childbirth and the puerperium                  |
| P23*  | Congenital pneumonia                                                                                                        |
| P35.0 | Congenital rubella syndrome                                                                                                 |
| P35.1 | Congenital cytomegalovirus infection                                                                                        |
| P35.2 | Congenital herpesviral [herpes simplex] infection                                                                           |
| P35.3 | Congenital viral hepatitis                                                                                                  |

|       |                                                              |
|-------|--------------------------------------------------------------|
| P36   | Bacterial sepsis of newborn                                  |
| P36.0 | Sepsis of newborn due to streptococcus, group B              |
| P36.1 | Sepsis of newborn due to other and unspecified streptococci  |
| P36.2 | Sepsis of newborn due to <i>Staphylococcus aureus</i>        |
| P36.3 | Sepsis of newborn due to other and unspecified staphylococci |
| P36.4 | Sepsis of newborn due to <i>Escherichia coli</i>             |
| P36.5 | Sepsis of newborn due to anaerobes                           |
| P36.8 | Other bacterial sepsis of newborn                            |
| P36.9 | Bacterial sepsis of newborn, unspecified                     |
| P37   | Other congenital infectious and parasitic diseases           |
| P37.0 | Congenital tuberculosis                                      |
| P37.1 | Congenital toxoplasmosis                                     |
| P37.2 | Neonatal (disseminated) listeriosis                          |
| P37.3 | Congenital falciparum malaria                                |
| P37.4 | Other congenital malaria                                     |
| P37.5 | Neonatal candidiasis                                         |
| P37.8 | Other specified congenital infectious and parasitic diseases |
| P37.9 | Congenital infectious and parasitic disease, unspecified     |
| P38*  | Omphalitis of newborn with or without mild haemorrhage       |
| P39   | Other infections specific to the perinatal period            |
| P39.0 | Neonatal infective mastitis                                  |
| P39.1 | Neonatal conjunctivitis and dacryocystitis                   |
| P39.2 | Intra-amniotic infection of fetus, not elsewhere classified  |
| P39.4 | Neonatal skin infection                                      |
| P39.8 | Other specified infections specific to the perinatal period  |
| P39.9 | Infection specific to the perinatal period, unspecified      |

---

**All bacterial infections**

|       |                                                                                      |
|-------|--------------------------------------------------------------------------------------|
| A00*  | Cholera                                                                              |
| A01*  | Typhoid and paratyphoid fevers                                                       |
| A02*  | Other salmonella infections                                                          |
| A03*  | Shigellosis                                                                          |
| A04   | Other bacterial intestinal infections                                                |
| A04.0 | Enteropathogenic <i>Escherichia coli</i> infection                                   |
| A04.1 | Enterotoxigenic <i>Escherichia coli</i> infection                                    |
| A04.2 | Enteroinvasive <i>Escherichia coli</i> infection                                     |
| A04.3 | Enterohaemorrhagic <i>Escherichia coli</i> infection                                 |
| A04.4 | Other intestinal <i>Escherichia coli</i> infections                                  |
| A04.5 | <i>Campylobacter</i> enteritis                                                       |
| A04.6 | Enteritis due to <i>Yersinia enterocolitica</i>                                      |
| A04.7 | Enterocolitis due to <i>Clostridium difficile</i>                                    |
| A04.8 | Other specified bacterial intestinal infections                                      |
| A04.9 | Bacterial intestinal infection, unspecified                                          |
| A05   | Other bacterial foodborne intoxications, not elsewhere classified                    |
| A05.0 | Foodborne staphylococcal intoxication                                                |
| A05.1 | Botulism                                                                             |
| A05.2 | Foodborne <i>Clostridium perfringens</i> [ <i>Clostridium welchii</i> ] intoxication |
| A05.3 | Foodborne <i>Vibrio parahaemolyticus</i> intoxication                                |
| A05.4 | Foodborne <i>Bacillus cereus</i> intoxication                                        |
| A05.8 | Other specified bacterial foodborne intoxications                                    |
| A05.9 | Bacterial foodborne intoxication, unspecified                                        |



|       |                                                                             |
|-------|-----------------------------------------------------------------------------|
| A09*  | Other gastroenteritis and colitis of infectious and unspecified origin      |
| A15*  | Respiratory tuberculosis, bacteriologically and histologically confirmed    |
| A16*  | Respiratory tuberculosis, not confirmed bacteriologically or histologically |
| A17*  | Tuberculosis of nervous system                                              |
| A18*  | Tuberculosis of other organs                                                |
| A19*  | Miliary tuberculosis                                                        |
| A20*  | Plague                                                                      |
| A21*  | Tularaemia                                                                  |
| A22*  | Anthrax                                                                     |
| A23*  | Brucellosis                                                                 |
| A24*  | Glanders and melioidosis                                                    |
| A25*  | Rat-bite fevers                                                             |
| A26   | Erysipeloid                                                                 |
| A26.0 | Cutaneous erysipeloid                                                       |
| A26.7 | Erysipelothrix sepsis                                                       |
| A26.8 | Other forms of erysipeloid                                                  |
| A26.9 | Erysipeloid, unspecified                                                    |
| A27*  | Leptospirosis                                                               |
| A28   | Other zoonotic bacterial diseases, not elsewhere classified                 |
| A28.0 | Pasteurellosis                                                              |
| A28.1 | Cat-scratch disease                                                         |
| A28.2 | Extraintestinal yersiniosis                                                 |
| A28.8 | Other specified zoonotic bacterial diseases, not elsewhere classified       |
| A28.9 | Zoonotic bacterial disease, unspecified                                     |
| A30*  | Leprosy [Hansen disease]                                                    |
| A31*  | Infection due to other mycobacteria                                         |
| A32*  | Listeriosis                                                                 |
| A33*  | Tetanus neonatorum                                                          |
| A34*  | Obstetrical tetanus                                                         |
| A35*  | Other tetanus                                                               |
| A36*  | Diphtheria                                                                  |
| A37*  | Whooping cough                                                              |
| A38*  | Scarlet fever                                                               |
| A39*  | Meningococcal infection                                                     |
| A40*  | Streptococcal sepsis                                                        |
| A41   | Other sepsis                                                                |
| A41.0 | Sepsis due to Staphylococcus aureus                                         |
| A41.1 | Sepsis due to other specified staphylococcus                                |
| A41.2 | Sepsis due to unspecified staphylococcus                                    |
| A41.3 | Sepsis due to Haemophilus influenzae                                        |
| A41.4 | Sepsis due to anaerobes                                                     |
| A41.5 | Sepsis due to other Gram-negative organisms                                 |
| A41.8 | Other specified sepsis                                                      |
| A41.9 | Sepsis, unspecified                                                         |
| A42*  | Actinomycosis                                                               |
| A43*  | Nocardiosis                                                                 |
| A44*  | Bartonellosis                                                               |
| A46*  | Erysipelas                                                                  |
| A48.0 | Gas gangrene                                                                |
| A48.1 | Legionnaires disease                                                        |
| A48.2 | Nonpneumonic Legionnaires disease [Pontiac fever]                           |

|       |                                                                                                   |
|-------|---------------------------------------------------------------------------------------------------|
| A48.3 | Toxic shock syndrome                                                                              |
| A48.4 | Brazilian purpuric fever                                                                          |
| A48.8 | Other specified bacterial diseases                                                                |
| A49   | Bacterial infection of unspecified site                                                           |
| A49.0 | Staphylococcal infection, unspecified site                                                        |
| A49.1 | Streptococcal infection, unspecified site                                                         |
| A49.2 | Haemophilus influenzae infection, unspecified site                                                |
| A49.3 | Mycoplasma infection, unspecified site                                                            |
| A49.8 | Other bacterial infections of unspecified site                                                    |
| A49.9 | Bacterial infection, unspecified                                                                  |
| A50*  | Congenital syphilis                                                                               |
| A51*  | Early syphilis                                                                                    |
| A52*  | Late syphilis                                                                                     |
| A53*  | Other and unspecified syphilis                                                                    |
| A54   | Gonococcal infection                                                                              |
| A54*  | Gonococcal infection                                                                              |
| A54.0 | Gonococcal infection of lower genitourinary tract without periurethral or accessory gland abscess |
| A54.1 | Gonococcal infection of lower genitourinary tract with periurethral and accessory gland abscess   |
| A54.2 | Gonococcal pelviperitonitis and other gonococcal genitourinary infections                         |
| A54.3 | Gonococcal infection of eye                                                                       |
| A54.4 | Gonococcal infection of musculoskeletal system                                                    |
| A54.5 | Gonococcal pharyngitis                                                                            |
| A54.6 | Gonococcal infection of anus and rectum                                                           |
| A54.8 | Other gonococcal infections                                                                       |
| A54.9 | Gonococcal infection, unspecified                                                                 |
| A55*  | Chlamydial lymphogranuloma (venereum)                                                             |
| A56.0 | Chlamydial infection of lower genitourinary tract                                                 |
| A56.1 | Chlamydial infection of pelviperitoneum and other genitourinary organs                            |
| A56.2 | Chlamydial infection of genitourinary tract, unspecified                                          |
| A56.3 | Chlamydial infection of anus and rectum                                                           |
| A56.4 | Chlamydial infection of pharynx                                                                   |
| A56.8 | Sexually transmitted chlamydial infection of other sites                                          |
| A57*  | Chancroid                                                                                         |
| A58*  | Granuloma inguinale                                                                               |
| A64*  | Unspecified sexually transmitted disease                                                          |
| A65*  | Nonvenereal syphilis                                                                              |
| A66*  | Yaws                                                                                              |
| A67*  | Pinta [carate]                                                                                    |
| A68*  | Relapsing fevers                                                                                  |
| A69*  | Other spirochaetal infections                                                                     |
| A70*  | Chlamydia psittaci infection                                                                      |
| A71*  | Trachoma                                                                                          |
| A74.0 | Chlamydial conjunctivitis                                                                         |
| A74.8 | Other chlamydial diseases                                                                         |
| A74.9 | Chlamydial infection, unspecified                                                                 |
| A75*  | Typhus fever                                                                                      |
| A77*  | Spotted fever [tick-borne rickettsioses]                                                          |
| A78*  | Q fever                                                                                           |
| A79*  | Other rickettsioses                                                                               |
| B95*  | Streptococcus and staphylococcus as the cause of diseases classified to other chapters            |
| B96.0 | Mycoplasma pneumoniae [M. pneumoniae] as the cause of diseases classified to other chapters       |

|       |                                                                                                |
|-------|------------------------------------------------------------------------------------------------|
| B96.1 | Klebsiella pneumoniae [K. pneumoniae] as the cause of diseases classified to other chapters    |
| B96.2 | Escherichia coli [E. coli] as the cause of diseases classified to other chapters               |
| B96.3 | Haemophilus influenzae [H. influenzae] as the cause of diseases classified to other chapters   |
| B96.4 | Proteus (mirabilis)(morganii) as the cause of diseases classified to other chapters            |
| B96.5 | Pseudomonas (aeruginosa) as the cause of diseases classified to other chapters                 |
| B96.6 | Bacillus fragilis [B. fragilis] as the cause of diseases classified to other chapters          |
| B96.7 | Clostridium perfringens [C. perfringens] as the cause of diseases classified to other chapters |
| B96.8 | Other specified bacterial agents as the cause of diseases classified to other chapters         |
| B98.0 | Helicobacter pylori [H.pylori] as the cause of diseases classified to other chapters           |
| B98.1 | Vibrio vulnificus as the cause of diseases classified to other chapters                        |
| D73.3 | Abscess of spleen                                                                              |
| E32.1 | Abscess of thymus                                                                              |
| G00   | Bacterial meningitis, not elsewhere classified                                                 |
| G00.0 | Haemophilus meningitis                                                                         |
| G00.1 | Pneumococcal meningitis                                                                        |
| G00.2 | Streptococcal meningitis                                                                       |
| G00.3 | Staphylococcal meningitis                                                                      |
| G00.8 | Other bacterial meningitis                                                                     |
| G00.9 | Bacterial meningitis, unspecified                                                              |
| G01*  | Meningitis in bacterial diseases classified elsewhere                                          |
| G04.2 | Bacterial meningoencephalitis and meningomyelitis, not elsewhere classified                    |
| G05.0 | Encephalitis, myelitis and encephalomyelitis in bacterial diseases classified elsewhere        |
| G06*  | Intracranial and intraspinal abscess and granuloma                                             |
| H00*  | Hordeolum and chalazion                                                                        |
| H01.0 | Blepharitis                                                                                    |
| H05.0 | Acute inflammation of orbit                                                                    |
| H10.0 | Mucopurulent conjunctivitis                                                                    |
| H10.5 | Blepharoconjunctivitis                                                                         |
| H44.0 | Purulent endophthalmitis                                                                       |
| H60.0 | Abscess of external ear                                                                        |
| H60.1 | Cellulitis of external ear                                                                     |
| H60.2 | Malignant otitis externa                                                                       |
| H60.3 | Other infective otitis externa                                                                 |
| H62.0 | Otitis externa in bacterial diseases classified elsewhere                                      |
| H62.3 | Otitis externa in other infectious and parasitic diseases classified elsewhere                 |
| H66.0 | Acute suppurative otitis media                                                                 |
| H67.0 | Otitis media in bacterial diseases classified elsewhere                                        |
| H70.0 | Acute mastoiditis                                                                              |
| I32.0 | Pericarditis in bacterial diseases classified elsewhere                                        |
| I33.0 | Acute and subacute infective endocarditis                                                      |
| I41.0 | Myocarditis in bacterial diseases classified elsewhere                                         |
| I52.0 | Other heart disorders in bacterial diseases classified elsewhere                               |
| J01.0 | Acute maxillary sinusitis                                                                      |
| J02   | Acute pharyngitis                                                                              |
| J02.0 | Streptococcal pharyngitis                                                                      |
| J02.8 | Acute pharyngitis due to other specified organisms                                             |
| J02.9 | Acute pharyngitis, unspecified                                                                 |
| J03   | Acute tonsillitis                                                                              |
| J03.0 | Streptococcal tonsillitis                                                                      |
| J03.8 | Acute tonsillitis due to other specified organisms                                             |
| J03.9 | Acute tonsillitis, unspecified                                                                 |

|       |                                                                                     |
|-------|-------------------------------------------------------------------------------------|
| J04*  | Acute laryngitis and tracheitis                                                     |
| J05.1 | Acute epiglottitis                                                                  |
| J13*  | Pneumonia due to Streptococcus pneumoniae                                           |
| J14*  | Pneumonia due to Haemophilus influenzae                                             |
| J15   | Bacterial pneumonia, not elsewhere classified                                       |
| J15.0 | Pneumonia due to Klebsiella pneumoniae                                              |
| J15.1 | Pneumonia due to Pseudomonas                                                        |
| J15.2 | Pneumonia due to staphylococcus                                                     |
| J15.3 | Pneumonia due to streptococcus, group B                                             |
| J15.4 | Pneumonia due to other streptococci                                                 |
| J15.5 | Pneumonia due to Escherichia coli                                                   |
| J15.6 | Pneumonia due to other aerobic Gram-negative bacteria                               |
| J15.7 | Pneumonia due to Mycoplasma pneumoniae                                              |
| J15.8 | Other bacterial pneumonia                                                           |
| J15.9 | Bacterial pneumonia, unspecified                                                    |
| J16   | Pneumonia due to other infectious organisms, not elsewhere classified               |
| J16.0 | Chlamydial pneumonia                                                                |
| J16.8 | Pneumonia due to other specified infectious organisms                               |
| J17.0 | Pneumonia in bacterial diseases classified elsewhere                                |
| J17.8 | Pneumonia in other diseases classified elsewhere                                    |
| J18*  | Pneumonia, organism unspecified                                                     |
| J20.0 | Acute bronchitis due to Mycoplasma pneumoniae                                       |
| J20.1 | Acute bronchitis due to Haemophilus influenzae                                      |
| J20.2 | Acute bronchitis due to streptococcus                                               |
| J20.8 | Acute bronchitis due to other specified organisms                                   |
| J20.9 | Acute bronchitis, unspecified                                                       |
| J22*  | Unspecified acute lower respiratory infection                                       |
| J36*  | Peritonsillar abscess                                                               |
| J39.0 | Retropharyngeal and parapharyngeal abscess                                          |
| J39.1 | Other abscess of pharynx                                                            |
| J85.1 | Abscess of lung with pneumonia                                                      |
| J85.2 | Abscess of lung without pneumonia                                                   |
| J85.3 | Abscess of mediastinum                                                              |
| J86*  | Pyothorax                                                                           |
| K02*  | Dental caries                                                                       |
| K04.4 | Acute apical periodontitis of pulpal origin                                         |
| K04.5 | Chronic apical periodontitis                                                        |
| K04.6 | Periapical abscess with sinus                                                       |
| K04.7 | Periapical abscess without sinus                                                    |
| K05.0 | Acute gingivitis                                                                    |
| K05.2 | Acute periodontitis                                                                 |
| K05.3 | Chronic periodontitis                                                               |
| K05.4 | Periodontosis                                                                       |
| K11.3 | Abscess of salivary gland                                                           |
| K12.2 | Cellulitis and abscess of mouth                                                     |
| K23.0 | Tuberculous oesophagitis                                                            |
| K35*  | Acute appendicitis                                                                  |
| K57.0 | Diverticular disease of small intestine with perforation and abscess                |
| K57.2 | Diverticular disease of large intestine with perforation and abscess                |
| K57.4 | Diverticular disease of both small and large intestine with perforation and abscess |
| K57.8 | Diverticular disease of intestine, part unspecified, with perforation and abscess   |

|       |                                                                     |
|-------|---------------------------------------------------------------------|
| K61*  | Abscess of anal and rectal regions                                  |
| K63.0 | Abscess of intestine                                                |
| K65.0 | Acute peritonitis                                                   |
| K67.0 | Chlamydial peritonitis                                              |
| K67.0 | Chlamydial peritonitis                                              |
| K67.1 | Gonococcal peritonitis                                              |
| K67.2 | Syphilitic peritonitis                                              |
| K67.3 | Tuberculous peritonitis                                             |
| K75.0 | Abscess of liver                                                    |
| L00*  | Staphylococcal scalded skin syndrome                                |
| L01*  | Impetigo                                                            |
| L02*  | Cutaneous abscess, furuncle and carbuncle                           |
| L03*  | Cellulitis                                                          |
| L04*  | Acute lymphadenitis                                                 |
| L05*  | Pilonidal cyst                                                      |
| L08*  | Other local infections of skin and subcutaneous tissue              |
| L70.1 | Acne conglobata                                                     |
| M00   | Pyogenic arthritis                                                  |
| M00.0 | Staphylococcal arthritis and polyarthritis                          |
| M00.1 | Pneumococcal arthritis and polyarthritis                            |
| M00.2 | Other streptococcal arthritis and polyarthritis                     |
| M00.8 | Arthritis and polyarthritis due to other specified bacterial agents |
| M00.9 | Pyogenic arthritis, unspecified                                     |
| M01.0 | Meningococcal arthritis                                             |
| M01.1 | Tuberculous arthritis                                               |
| M01.2 | Arthritis in Lyme disease                                           |
| M01.3 | Arthritis in other bacterial diseases classified elsewhere          |
| M46.2 | Osteomyelitis of vertebra                                           |
| M46.3 | Infection of intervertebral disc (pyogenic)                         |
| M46.5 | Other infective spondylopathies                                     |
| M49.0 | Tuberculosis of spine                                               |
| M49.1 | Brucella spondylitis                                                |
| M49.2 | Enterobacterial spondylitis                                         |
| M63.0 | Myositis in bacterial diseases classified elsewhere                 |
| M65.0 | Abscess of tendon sheath                                            |
| M65.1 | Other infective (teno)synovitis                                     |
| M71.0 | Abscess of bursa                                                    |
| M71.1 | Other infective bursitis                                            |
| M73.0 | Gonococcal bursitis                                                 |
| M73.1 | Syphilitic bursitis                                                 |
| M86*  | Osteomyelitis                                                       |
| N10*  | Acute tubulo-interstitial nephritis                                 |
| N13.6 | Pyonephrosis                                                        |
| N15.1 | Renal and perinephric abscess                                       |
| N29.0 | Late syphilis of kidney                                             |
| N30.0 | Acute cystitis                                                      |
| N34.0 | Urethral abscess                                                    |
| N39.0 | Urinary tract infection, site not specified                         |
| N41.0 | Acute prostatitis                                                   |
| N41.2 | Abscess of prostate                                                 |
| N45*  | Orchitis and epididymitis                                           |

|       |                                                                                                                         |
|-------|-------------------------------------------------------------------------------------------------------------------------|
| N61*  | Inflammatory disorders of breast                                                                                        |
| N70.0 | Acute salpingitis and oophoritis                                                                                        |
| N71.0 | Acute inflammatory disease of uterus                                                                                    |
| N73.0 | Acute parametritis and pelvic cellulitis                                                                                |
| N73.3 | Female acute pelvic peritonitis                                                                                         |
| N74.0 | Tuberculous infection of cervix uteri                                                                                   |
| N74.1 | Female tuberculous pelvic inflammatory disease                                                                          |
| N74.2 | Female syphilitic pelvic inflammatory disease                                                                           |
| N74.3 | Female gonococcal pelvic inflammatory disease                                                                           |
| N74.4 | Female chlamydial pelvic inflammatory disease                                                                           |
| N75.1 | Abscess of Bartholin gland                                                                                              |
| N76.0 | Acute vaginitis                                                                                                         |
| N76.2 | Acute vulvitis                                                                                                          |
| N76.4 | Abscess of vulva                                                                                                        |
| O03.0 | Spontaneous abortion: Incomplete, complicated by genital tract and pelvic infection                                     |
| O03.5 | Spontaneous abortion: Complete or unspecified, complicated by genital tract and pelvic infection                        |
| O04.0 | Medical abortion: Incomplete, complicated by genital tract and pelvic infection                                         |
| O04.5 | Medical abortion: Complete or unspecified, complicated by genital tract and pelvic infection                            |
| O05.0 | Other abortion: Incomplete, complicated by genital tract and pelvic infection                                           |
| O05.5 | Other abortion: Complete or unspecified, complicated by genital tract and pelvic infection                              |
| O06.0 | Unspecified abortion: Incomplete, complicated by genital tract and pelvic infection                                     |
| O06.5 | Unspecified abortion: Complete or unspecified, complicated by genital tract and pelvic infection                        |
| O07.0 | Failed medical abortion, complicated by genital tract and pelvic infection                                              |
| O07.5 | Other and unspecified failed attempted abortion, complicated by genital tract and pelvic infection                      |
| O08.0 | Genital tract and pelvic infection following abortion and ectopic and molar pregnancy                                   |
| O23.0 | Infections of kidney in pregnancy                                                                                       |
| O23.1 | Infections of bladder in pregnancy                                                                                      |
| O23.2 | Infections of urethra in pregnancy                                                                                      |
| O23.3 | Infections of other parts of urinary tract in pregnancy                                                                 |
| O23.4 | Unspecified infection of urinary tract in pregnancy                                                                     |
| O23.5 | Infections of the genital tract in pregnancy                                                                            |
| O23.9 | Other and unspecified genitourinary tract infection in pregnancy                                                        |
| O75.3 | Other infection during labour                                                                                           |
| O85*  | Puerperal sepsis                                                                                                        |
| O86*  | Other puerperal infections                                                                                              |
| O91.0 | Infection of nipple associated with childbirth                                                                          |
| O91.1 | Abscess of breast associated with childbirth                                                                            |
| O98.0 | Tuberculosis complicating pregnancy, childbirth and the puerperium                                                      |
| O98.1 | Syphilis complicating pregnancy, childbirth and the puerperium                                                          |
| O98.2 | Gonorrhoea complicating pregnancy, childbirth and the puerperium                                                        |
| O98.3 | Other infections with a predominantly sexual mode of transmission complicating pregnancy, childbirth and the puerperium |
| O98.8 | Other maternal infectious and parasitic diseases complicating pregnancy, childbirth and the puerperium                  |
| O98.9 | Unspecified maternal infectious or parasitic disease complicating pregnancy, childbirth and the puerperium              |
| P23*  | Congenital pneumonia                                                                                                    |
| P36   | Bacterial sepsis of newborn                                                                                             |
| P36.0 | Sepsis of newborn due to streptococcus, group B                                                                         |
| P36.1 | Sepsis of newborn due to other and unspecified streptococci                                                             |
| P36.2 | Sepsis of newborn due to Staphylococcus aureus                                                                          |
| P36.3 | Sepsis of newborn due to other and unspecified staphylococci                                                            |
| P36.4 | Sepsis of newborn due to Escherichia coli                                                                               |
| P36.5 | Sepsis of newborn due to anaerobes                                                                                      |

|       |                                                             |
|-------|-------------------------------------------------------------|
| P36.8 | Other bacterial sepsis of newborn                           |
| P36.9 | Bacterial sepsis of newborn, unspecified                    |
| P37.0 | Congenital tuberculosis                                     |
| P37.2 | Neonatal (disseminated) listeriosis                         |
| P38*  | Omphalitis of newborn with or without mild haemorrhage      |
| P39.0 | Neonatal infective mastitis                                 |
| P39.1 | Neonatal conjunctivitis and dacryocystitis                  |
| P39.2 | Intra-amniotic infection of fetus, not elsewhere classified |
| P39.4 | Neonatal skin infection                                     |

---

#### **Invasive bacterial infections**

|       |                                                                             |
|-------|-----------------------------------------------------------------------------|
| A01*  | Typhoid and paratyphoid fevers                                              |
| A02*  | Other salmonella infections                                                 |
| A03*  | Shigellosis                                                                 |
| A15*  | Respiratory tuberculosis, bacteriologically and histologically confirmed    |
| A16*  | Respiratory tuberculosis, not confirmed bacteriologically or histologically |
| A17*  | Tuberculosis of nervous system                                              |
| A18*  | Tuberculosis of other organs                                                |
| A19*  | Miliary tuberculosis                                                        |
| A20*  | Plague                                                                      |
| A21*  | Tularaemia                                                                  |
| A22*  | Anthrax                                                                     |
| A23*  | Brucellosis                                                                 |
| A24*  | Glanders and melioidosis                                                    |
| A25*  | Rat-bite fevers                                                             |
| A26.7 | Erysipelothrix sepsis                                                       |
| A26.8 | Other forms of erysipeloid                                                  |
| A27*  | Leptospirosis                                                               |
| A28   | Other zoonotic bacterial diseases, not elsewhere classified                 |
| A28.0 | Pasteurellosis                                                              |
| A28.1 | Cat-scratch disease                                                         |
| A28.2 | Extraintestinal yersiniosis                                                 |
| A28.8 | Other specified zoonotic bacterial diseases, not elsewhere classified       |
| A28.9 | Zoonotic bacterial disease, unspecified                                     |
| A30*  | Leprosy [Hansen disease]                                                    |
| A31*  | Infection due to other mycobacteria                                         |
| A32*  | Listeriosis                                                                 |
| A33*  | Tetanus neonatorum                                                          |
| A34*  | Obstetrical tetanus                                                         |
| A35*  | Other tetanus                                                               |
| A36*  | Diphtheria                                                                  |
| A38*  | Scarlet fever                                                               |
| A39*  | Meningococcal infection                                                     |
| A40*  | Streptococcal sepsis                                                        |
| A41   | Other sepsis                                                                |
| A41.0 | Sepsis due to <i>Staphylococcus aureus</i>                                  |
| A41.1 | Sepsis due to other specified staphylococcus                                |
| A41.2 | Sepsis due to unspecified staphylococcus                                    |
| A41.3 | Sepsis due to <i>Haemophilus influenzae</i>                                 |
| A41.4 | Sepsis due to anaerobes                                                     |
| A41.5 | Sepsis due to other Gram-negative organisms                                 |

|       |                                                                                                 |
|-------|-------------------------------------------------------------------------------------------------|
| A41.8 | Other specified sepsis                                                                          |
| A41.9 | Sepsis, unspecified                                                                             |
| A42*  | Actinomycosis                                                                                   |
| A43*  | Nocardiosis                                                                                     |
| A44*  | Bartonellosis                                                                                   |
| A46*  | Erysipelas                                                                                      |
| A48.0 | Gas gangrene                                                                                    |
| A48.1 | Legionnaires disease                                                                            |
| A48.3 | Toxic shock syndrome                                                                            |
| A48.4 | Brazilian purpuric fever                                                                        |
| A48.8 | Other specified bacterial diseases                                                              |
| A49.0 | Staphylococcal infection, unspecified site                                                      |
| A49.1 | Streptococcal infection, unspecified site                                                       |
| A49.2 | Haemophilus influenzae infection, unspecified site                                              |
| A49.8 | Other bacterial infections of unspecified site                                                  |
| A49.9 | Bacterial infection, unspecified                                                                |
| A50*  | Congenital syphilis                                                                             |
| A51*  | Early syphilis                                                                                  |
| A52*  | Late syphilis                                                                                   |
| A53*  | Other and unspecified syphilis                                                                  |
| A54.1 | Gonococcal infection of lower genitourinary tract with periurethral and accessory gland abscess |
| A54.2 | Gonococcal pelviperitonitis and other gonococcal genitourinary infections                       |
| A54.4 | Gonococcal infection of musculoskeletal system                                                  |
| A54.8 | Other gonococcal infections                                                                     |
| A55*  | Chlamydial lymphogranuloma (venereum)                                                           |
| A56.1 | Chlamydial infection of pelviperitoneum and other genitourinary organs                          |
| A65*  | Nonvenereal syphilis                                                                            |
| A66*  | Yaws                                                                                            |
| A67*  | Pinta [carate]                                                                                  |
| A68*  | Relapsing fevers                                                                                |
| A69*  | Other spirochaetal infections                                                                   |
| A70*  | Chlamydia psittaci infection                                                                    |
| A75*  | Typhus fever                                                                                    |
| A77*  | Spotted fever [tick-borne rickettsioses]                                                        |
| A78*  | Q fever                                                                                         |
| A79*  | Other rickettsioses                                                                             |
| B95*  | Streptococcus and staphylococcus as the cause of diseases classified to other chapters          |
| B96.1 | Klebsiella pneumoniae [K. pneumoniae] as the cause of diseases classified to other chapters     |
| B96.2 | Escherichia coli [E. coli] as the cause of diseases classified to other chapters                |
| B96.3 | Haemophilus influenzae [H. influenzae] as the cause of diseases classified to other chapters    |
| B96.4 | Proteus (mirabilis)(morganii) as the cause of diseases classified to other chapters             |
| B96.5 | Pseudomonas (aeruginosa) as the cause of diseases classified to other chapters                  |
| B96.6 | Bacillus fragilis [B. fragilis] as the cause of diseases classified to other chapters           |
| B96.7 | Clostridium perfringens [C. perfringens] as the cause of diseases classified to other chapters  |
| B96.8 | Other specified bacterial agents as the cause of diseases classified to other chapters          |
| D73.3 | Abscess of spleen                                                                               |
| E32.1 | Abscess of thymus                                                                               |
| G00   | Bacterial meningitis, not elsewhere classified                                                  |
| G00.0 | Haemophilus meningitis                                                                          |
| G00.1 | Pneumococcal meningitis                                                                         |
| G00.2 | Streptococcal meningitis                                                                        |



|       |                                                                                         |
|-------|-----------------------------------------------------------------------------------------|
| G00.3 | Staphylococcal meningitis                                                               |
| G00.8 | Other bacterial meningitis                                                              |
| G00.9 | Bacterial meningitis, unspecified                                                       |
| G01*  | Meningitis in bacterial diseases classified elsewhere                                   |
| G04.2 | Bacterial meningoencephalitis and meningomyelitis, not elsewhere classified             |
| G05.0 | Encephalitis, myelitis and encephalomyelitis in bacterial diseases classified elsewhere |
| G06*  | Intracranial and intraspinal abscess and granuloma                                      |
| H05.0 | Acute inflammation of orbit                                                             |
| H44.0 | Purulent endophthalmitis                                                                |
| H60.0 | Abscess of external ear                                                                 |
| H60.1 | Cellulitis of external ear                                                              |
| H60.2 | Malignant otitis externa                                                                |
| H70.0 | Acute mastoiditis                                                                       |
| I32.0 | Pericarditis in bacterial diseases classified elsewhere                                 |
| I33.0 | Acute and subacute infective endocarditis                                               |
| I41.0 | Myocarditis in bacterial diseases classified elsewhere                                  |
| I52.0 | Other heart disorders in bacterial diseases classified elsewhere                        |
| J05.1 | Acute epiglottitis                                                                      |
| J13*  | Pneumonia due to <i>Streptococcus pneumoniae</i>                                        |
| J14*  | Pneumonia due to <i>Haemophilus influenzae</i>                                          |
| J15   | Bacterial pneumonia, not elsewhere classified                                           |
| J15.0 | Pneumonia due to <i>Klebsiella pneumoniae</i>                                           |
| J15.1 | Pneumonia due to <i>Pseudomonas</i>                                                     |
| J15.2 | Pneumonia due to staphylococcus                                                         |
| J15.3 | Pneumonia due to streptococcus, group B                                                 |
| J15.4 | Pneumonia due to other streptococci                                                     |
| J15.5 | Pneumonia due to <i>Escherichia coli</i>                                                |
| J15.6 | Pneumonia due to other aerobic Gram-negative bacteria                                   |
| J15.7 | Pneumonia due to <i>Mycoplasma pneumoniae</i>                                           |
| J15.8 | Other bacterial pneumonia                                                               |
| J15.9 | Bacterial pneumonia, unspecified                                                        |
| J16   | Pneumonia due to other infectious organisms, not elsewhere classified                   |
| J16.0 | Chlamydial pneumonia                                                                    |
| J16.8 | Pneumonia due to other specified infectious organisms                                   |
| J17.0 | Pneumonia in bacterial diseases classified elsewhere                                    |
| J17.8 | Pneumonia in other diseases classified elsewhere                                        |
| J18*  | Pneumonia, organism unspecified                                                         |
| J36*  | Peritonsillar abscess                                                                   |
| J39.0 | Retropharyngeal and parapharyngeal abscess                                              |
| J39.1 | Other abscess of pharynx                                                                |
| J85.1 | Abscess of lung with pneumonia                                                          |
| J85.2 | Abscess of lung without pneumonia                                                       |
| J85.3 | Abscess of mediastinum                                                                  |
| J86*  | Pyothorax                                                                               |
| K12.2 | Cellulitis and abscess of mouth                                                         |
| K23.0 | Tuberculous oesophagitis                                                                |
| K35*  | Acute appendicitis                                                                      |
| K57.0 | Diverticular disease of small intestine with perforation and abscess                    |
| K57.2 | Diverticular disease of large intestine with perforation and abscess                    |
| K57.4 | Diverticular disease of both small and large intestine with perforation and abscess     |
| K57.8 | Diverticular disease of intestine, part unspecified, with perforation and abscess       |

|       |                                                                     |
|-------|---------------------------------------------------------------------|
| K61*  | Abscess of anal and rectal regions                                  |
| K63.0 | Abscess of intestine                                                |
| K65.0 | Acute peritonitis                                                   |
| K67.0 | Chlamydial peritonitis                                              |
| K67.1 | Gonococcal peritonitis                                              |
| K67.2 | Syphilitic peritonitis                                              |
| K67.3 | Tuberculous peritonitis                                             |
| K75.0 | Abscess of liver                                                    |
| M00   | Pyogenic arthritis                                                  |
| M00.0 | Staphylococcal arthritis and polyarthritis                          |
| M00.1 | Pneumococcal arthritis and polyarthritis                            |
| M00.2 | Other streptococcal arthritis and polyarthritis                     |
| M00.8 | Arthritis and polyarthritis due to other specified bacterial agents |
| M00.9 | Pyogenic arthritis, unspecified                                     |
| M01.0 | Meningococcal arthritis                                             |
| M01.1 | Tuberculous arthritis                                               |
| M01.2 | Arthritis in Lyme disease                                           |
| M01.3 | Arthritis in other bacterial diseases classified elsewhere          |
| M46.2 | Osteomyelitis of vertebra                                           |
| M46.3 | Infection of intervertebral disc (pyogenic)                         |
| M46.5 | Other infective spondylopathies                                     |
| M49.0 | Tuberculosis of spine                                               |
| M49.1 | Brucella spondylitis                                                |
| M49.2 | Enterobacterial spondylitis                                         |
| M63.0 | Myositis in bacterial diseases classified elsewhere                 |
| M65.0 | Abscess of tendon sheath                                            |
| M65.1 | Other infective (teno)synovitis                                     |
| M71.0 | Abscess of bursa                                                    |
| M71.1 | Other infective bursitis                                            |
| M73.0 | Gonococcal bursitis                                                 |
| M73.1 | Syphilitic bursitis                                                 |
| M86*  | Osteomyelitis                                                       |
| N10*  | Acute tubulo-interstitial nephritis                                 |
| N13.6 | Pyonephrosis                                                        |
| N15.1 | Renal and perinephric abscess                                       |
| N29.0 | Late syphilis of kidney                                             |
| N34.0 | Urethral abscess                                                    |
| N41.2 | Abscess of prostate                                                 |
| N45*  | Orchitis and epididymitis                                           |
| N61*  | Inflammatory disorders of breast                                    |
| N70.0 | Acute salpingitis and oophoritis                                    |
| N71.0 | Acute inflammatory disease of uterus                                |
| N73.0 | Acute parametritis and pelvic cellulitis                            |
| N73.3 | Female acute pelvic peritonitis                                     |
| N74.0 | Tuberculous infection of cervix uteri                               |
| N74.1 | Female tuberculous pelvic inflammatory disease                      |
| N74.2 | Female syphilitic pelvic inflammatory disease                       |
| N74.3 | Female gonococcal pelvic inflammatory disease                       |
| N74.4 | Female chlamydial pelvic inflammatory disease                       |
| N75.1 | Abscess of Bartholin gland                                          |
| N76.4 | Abscess of vulva                                                    |

|       |                                                                                                    |
|-------|----------------------------------------------------------------------------------------------------|
| O03.0 | Spontaneous abortion: Incomplete, complicated by genital tract and pelvic infection                |
| O03.5 | Spontaneous abortion: Complete or unspecified, complicated by genital tract and pelvic infection   |
| O04.0 | Medical abortion: Incomplete, complicated by genital tract and pelvic infection                    |
| O04.5 | Medical abortion: Complete or unspecified, complicated by genital tract and pelvic infection       |
| O05.0 | Other abortion: Incomplete, complicated by genital tract and pelvic infection                      |
| O05.5 | Other abortion: Complete or unspecified, complicated by genital tract and pelvic infection         |
| O06.0 | Unspecified abortion: Incomplete, complicated by genital tract and pelvic infection                |
| O06.5 | Unspecified abortion: Complete or unspecified, complicated by genital tract and pelvic infection   |
| O07.0 | Failed medical abortion, complicated by genital tract and pelvic infection                         |
| O07.5 | Other and unspecified failed attempted abortion, complicated by genital tract and pelvic infection |
| O08.0 | Genital tract and pelvic infection following abortion and ectopic and molar pregnancy              |
| O23.0 | Infections of kidney in pregnancy                                                                  |
| O85*  | Puerperal sepsis                                                                                   |
| O91.1 | Abscess of breast associated with childbirth                                                       |
| O98.0 | Tuberculosis complicating pregnancy, childbirth and the puerperium                                 |
| O98.1 | Syphilis complicating pregnancy, childbirth and the puerperium                                     |
| P23*  | Congenital pneumonia                                                                               |
| P36   | Bacterial sepsis of newborn                                                                        |
| P36.0 | Sepsis of newborn due to streptococcus, group B                                                    |
| P36.1 | Sepsis of newborn due to other and unspecified streptococci                                        |
| P36.2 | Sepsis of newborn due to Staphylococcus aureus                                                     |
| P36.3 | Sepsis of newborn due to other and unspecified staphylococci                                       |
| P36.4 | Sepsis of newborn due to Escherichia coli                                                          |
| P36.5 | Sepsis of newborn due to anaerobes                                                                 |
| P36.8 | Other bacterial sepsis of newborn                                                                  |
| P36.9 | Bacterial sepsis of newborn, unspecified                                                           |
| P37.0 | Congenital tuberculosis                                                                            |
| P37.2 | Neonatal (disseminated) listeriosis                                                                |
| P39.0 | Neonatal infective mastitis                                                                        |
| P39.2 | Intra-amniotic infection of fetus, not elsewhere classified                                        |

#### **Localised bacterial infections**

|       |                                                                      |
|-------|----------------------------------------------------------------------|
| A00*  | Cholera                                                              |
| A04   | Other bacterial intestinal infections                                |
| A04.0 | Enteropathogenic Escherichia coli infection                          |
| A04.1 | Enterotoxigenic Escherichia coli infection                           |
| A04.2 | Enteroinvasive Escherichia coli infection                            |
| A04.3 | Enterohaemorrhagic Escherichia coli infection                        |
| A04.4 | Other intestinal Escherichia coli infections                         |
| A04.5 | Campylobacter enteritis                                              |
| A04.6 | Enteritis due to Yersinia enterocolitica                             |
| A04.7 | Enterocolitis due to Clostridium difficile                           |
| A04.8 | Other specified bacterial intestinal infections                      |
| A04.9 | Bacterial intestinal infection, unspecified                          |
| A05   | Other bacterial foodborne intoxications, not elsewhere classified    |
| A05.0 | Foodborne staphylococcal intoxication                                |
| A05.1 | Botulism                                                             |
| A05.2 | Foodborne Clostridium perfringens [Clostridium welchii] intoxication |
| A05.3 | Foodborne Vibrio parahaemolyticus intoxication                       |
| A05.4 | Foodborne Bacillus cereus intoxication                               |
| A05.8 | Other specified bacterial foodborne intoxications                    |

|       |                                                                                                   |
|-------|---------------------------------------------------------------------------------------------------|
| A05.9 | Bacterial foodborne intoxication, unspecified                                                     |
| A09*  | Other gastroenteritis and colitis of infectious and unspecified origin                            |
| A26   | Erysipeloid                                                                                       |
| A26.0 | Cutaneous erysipeloid                                                                             |
| A26.9 | Erysipeloid, unspecified                                                                          |
| A37*  | Whooping cough                                                                                    |
| A48.2 | Nonpneumonic Legionnaires disease [Pontiac fever]                                                 |
| A54*  | Gonococcal infection                                                                              |
| A54.0 | Gonococcal infection of lower genitourinary tract without periurethral or accessory gland abscess |
| A54.3 | Gonococcal infection of eye                                                                       |
| A54.5 | Gonococcal pharyngitis                                                                            |
| A54.6 | Gonococcal infection of anus and rectum                                                           |
| A56.0 | Chlamydial infection of lower genitourinary tract                                                 |
| A56.3 | Chlamydial infection of anus and rectum                                                           |
| A56.4 | Chlamydial infection of pharynx                                                                   |
| A57*  | Chancroid                                                                                         |
| A58*  | Granuloma inguinale                                                                               |
| A64*  | Unspecified sexually transmitted disease                                                          |
| A71*  | Trachoma                                                                                          |
| A74.0 | Chlamydial conjunctivitis                                                                         |
| B98.0 | Helicobacter pylori [H.pylori] as the cause of diseases classified to other chapters              |
| B98.1 | Vibrio vulnificus as the cause of diseases classified to other chapters                           |
| H00*  | Hordeolum and chalazion                                                                           |
| H01.0 | Blepharitis                                                                                       |
| H10.0 | Mucopurulent conjunctivitis                                                                       |
| H10.5 | Blepharoconjunctivitis                                                                            |
| H60.3 | Other infective otitis externa                                                                    |
| H62.3 | Otitis externa in other infectious and parasitic diseases classified elsewhere                    |
| H66.0 | Acute suppurative otitis media                                                                    |
| H67.0 | Otitis media in bacterial diseases classified elsewhere                                           |
| J01.0 | Acute maxillary sinusitis                                                                         |
| J02   | Acute pharyngitis                                                                                 |
| J02.0 | Streptococcal pharyngitis                                                                         |
| J02.8 | Acute pharyngitis due to other specified organisms                                                |
| J02.9 | Acute pharyngitis, unspecified                                                                    |
| J03   | Acute tonsillitis                                                                                 |
| J03.0 | Streptococcal tonsillitis                                                                         |
| J03.8 | Acute tonsillitis due to other specified organisms                                                |
| J03.9 | Acute tonsillitis, unspecified                                                                    |
| J04*  | Acute laryngitis and tracheitis                                                                   |
| J20.0 | Acute bronchitis due to Mycoplasma pneumoniae                                                     |
| J20.1 | Acute bronchitis due to Haemophilus influenzae                                                    |
| J20.2 | Acute bronchitis due to streptococcus                                                             |
| J20.8 | Acute bronchitis due to other specified organisms                                                 |
| J20.9 | Acute bronchitis, unspecified                                                                     |
| J22*  | Unspecified acute lower respiratory infection                                                     |
| K02*  | Dental caries                                                                                     |
| K04.4 | Acute apical periodontitis of pulpal origin                                                       |
| K04.5 | Chronic apical periodontitis                                                                      |
| K04.6 | Periapical abscess with sinus                                                                     |
| K04.7 | Periapical abscess without sinus                                                                  |

|       |                                                                                                                         |
|-------|-------------------------------------------------------------------------------------------------------------------------|
| K05.0 | Acute gingivitis                                                                                                        |
| K05.2 | Acute periodontitis                                                                                                     |
| K05.3 | Chronic periodontitis                                                                                                   |
| K05.4 | Periodontosis                                                                                                           |
| K11.3 | Abscess of salivary gland                                                                                               |
| L00*  | Staphylococcal scalded skin syndrome                                                                                    |
| L01*  | Impetigo                                                                                                                |
| L02*  | Cutaneous abscess, furuncle and carbuncle                                                                               |
| L03*  | Cellulitis                                                                                                              |
| L04*  | Acute lymphadenitis                                                                                                     |
| L05*  | Pilonidal cyst                                                                                                          |
| L08*  | Other local infections of skin and subcutaneous tissue                                                                  |
| L70.1 | Acne conglobata                                                                                                         |
| N30.0 | Acute cystitis                                                                                                          |
| N39.0 | Urinary tract infection, site not specified                                                                             |
| N41.0 | Acute prostatitis                                                                                                       |
| N76.0 | Acute vaginitis                                                                                                         |
| N76.2 | Acute vulvitis                                                                                                          |
| O23.1 | Infections of bladder in pregnancy                                                                                      |
| O23.2 | Infections of urethra in pregnancy                                                                                      |
| O23.3 | Infections of other parts of urinary tract in pregnancy                                                                 |
| O23.4 | Unspecified infection of urinary tract in pregnancy                                                                     |
| O23.5 | Infections of the genital tract in pregnancy                                                                            |
| O23.9 | Other and unspecified genitourinary tract infection in pregnancy                                                        |
| O75.3 | Other infection during labour                                                                                           |
| O86*  | Other puerperal infections                                                                                              |
| O91.0 | Infection of nipple associated with childbirth                                                                          |
| O98.2 | Gonorrhoea complicating pregnancy, childbirth and the puerperium                                                        |
| O98.3 | Other infections with a predominantly sexual mode of transmission complicating pregnancy, childbirth and the puerperium |
| O98.8 | Other maternal infectious and parasitic diseases complicating pregnancy, childbirth and the puerperium                  |
| O98.9 | Unspecified maternal infectious or parasitic disease complicating pregnancy, childbirth and the puerperium              |
| P38*  | Omphalitis of newborn with or without mild haemorrhage                                                                  |
| P39.1 | Neonatal conjunctivitis and dacryocystitis                                                                              |
| P39.4 | Neonatal skin infection                                                                                                 |

#### **Intracellular bacterial infections**

|       |                                                                             |
|-------|-----------------------------------------------------------------------------|
| A01*  | Typhoid and paratyphoid fevers                                              |
| A02*  | Other salmonella infections                                                 |
| A03*  | Shigellosis                                                                 |
| A04.2 | Enteroinvasive Escherichia coli infection                                   |
| A04.5 | Campylobacter enteritis                                                     |
| A04.6 | Enteritis due to Yersinia enterocolitica                                    |
| A15*  | Respiratory tuberculosis, bacteriologically and histologically confirmed    |
| A16*  | Respiratory tuberculosis, not confirmed bacteriologically or histologically |
| A17*  | Tuberculosis of nervous system                                              |
| A18*  | Tuberculosis of other organs                                                |
| A19*  | Miliary tuberculosis                                                        |
| A20*  | Plague                                                                      |
| A21*  | Tularaemia                                                                  |
| A23*  | Brucellosis                                                                 |
| A24*  | Glanders and melioidosis                                                    |

|       |                                                                                             |
|-------|---------------------------------------------------------------------------------------------|
| A26   | Erysipeloid                                                                                 |
| A26.0 | Cutaneous erysipeloid                                                                       |
| A26.7 | Erysipelothrix sepsis                                                                       |
| A26.8 | Other forms of erysipeloid                                                                  |
| A26.9 | Erysipeloid, unspecified                                                                    |
| A28.1 | Cat-scratch disease                                                                         |
| A28.2 | Extraintestinal yersiniosis                                                                 |
| A30*  | Leprosy [Hansen disease]                                                                    |
| A31*  | Infection due to other mycobacteria                                                         |
| A32*  | Listeriosis                                                                                 |
| A43*  | Nocardiosis                                                                                 |
| A44*  | Bartonellosis                                                                               |
| A48.1 | Legionnaires disease                                                                        |
| A48.2 | Nonpneumonic Legionnaires disease [Pontiac fever]                                           |
| A49.3 | Mycoplasma infection, unspecified site                                                      |
| A55*  | Chlamydial lymphogranuloma (venereum)                                                       |
| A56.0 | Chlamydial infection of lower genitourinary tract                                           |
| A56.1 | Chlamydial infection of pelviperitoneum and other genitourinary organs                      |
| A56.2 | Chlamydial infection of genitourinary tract, unspecified                                    |
| A56.3 | Chlamydial infection of anus and rectum                                                     |
| A56.4 | Chlamydial infection of pharynx                                                             |
| A56.8 | Sexually transmitted chlamydial infection of other sites                                    |
| A58*  | Granuloma inguinale                                                                         |
| A70*  | Chlamydia psittaci infection                                                                |
| A71*  | Trachoma                                                                                    |
| A74.0 | Chlamydial conjunctivitis                                                                   |
| A74.8 | Other chlamydial diseases                                                                   |
| A74.9 | Chlamydial infection, unspecified                                                           |
| A75*  | Typhus fever                                                                                |
| A77*  | Spotted fever [tick-borne rickettsioses]                                                    |
| A78*  | Q fever                                                                                     |
| A79*  | Other rickettsioses                                                                         |
| B96.0 | Mycoplasma pneumoniae [M. pneumoniae] as the cause of diseases classified to other chapters |
| J15.7 | Pneumonia due to Mycoplasma pneumoniae                                                      |
| J16.0 | Chlamydial pneumonia                                                                        |
| J20.0 | Acute bronchitis due to Mycoplasma pneumoniae                                               |
| K23.0 | Tuberculous oesophagitis                                                                    |
| K67.0 | Chlamydial peritonitis                                                                      |
| K67.3 | Tuberculous peritonitis                                                                     |
| M01.1 | Tuberculous arthritis                                                                       |
| M49.0 | Tuberculosis of spine                                                                       |
| M49.1 | Brucella spondylitis                                                                        |
| N74.0 | Tuberculous infection of cervix uteri                                                       |
| N74.1 | Female tuberculous pelvic inflammatory disease                                              |
| N74.4 | Female chlamydial pelvic inflammatory disease                                               |
| O98.0 | Tuberculosis complicating pregnancy, childbirth and the puerperium                          |
| P37.0 | Congenital tuberculosis                                                                     |
| P37.2 | Neonatal (disseminated) listeriosis                                                         |

---

**Extracellular bacterial infections**

|      |         |
|------|---------|
| A00* | Cholera |
|------|---------|

|       |                                                                                                   |
|-------|---------------------------------------------------------------------------------------------------|
| A04.0 | Enteropathogenic Escherichia coli infection                                                       |
| A04.1 | Enterotoxigenic Escherichia coli infection                                                        |
| A04.3 | Enterohaemorrhagic Escherichia coli infection                                                     |
| A04.4 | Other intestinal Escherichia coli infections                                                      |
| A04.7 | Enterocolitis due to Clostridium difficile                                                        |
| A05.0 | Foodborne staphylococcal intoxication                                                             |
| A05.1 | Botulism                                                                                          |
| A05.2 | Foodborne Clostridium perfringens [Clostridium welchii] intoxication                              |
| A05.3 | Foodborne Vibrio parahaemolyticus intoxication                                                    |
| A05.4 | Foodborne Bacillus cereus intoxication                                                            |
| A22*  | Anthrax                                                                                           |
| A25*  | Rat-bite fevers                                                                                   |
| A27*  | Leptospirosis                                                                                     |
| A28.0 | Pasteurellosis                                                                                    |
| A33*  | Tetanus neonatorum                                                                                |
| A34*  | Obstetrical tetanus                                                                               |
| A35*  | Other tetanus                                                                                     |
| A36*  | Diphtheria                                                                                        |
| A37*  | Whooping cough                                                                                    |
| A38*  | Scarlet fever                                                                                     |
| A39*  | Meningococcal infection                                                                           |
| A40*  | Streptococcal sepsis                                                                              |
| A41.0 | Sepsis due to Staphylococcus aureus                                                               |
| A41.1 | Sepsis due to other specified staphylococcus                                                      |
| A41.2 | Sepsis due to unspecified staphylococcus                                                          |
| A41.3 | Sepsis due to Haemophilus influenzae                                                              |
| A48.0 | Gas gangrene                                                                                      |
| A48.3 | Toxic shock syndrome                                                                              |
| A48.4 | Brazilian purpuric fever                                                                          |
| A49.0 | Staphylococcal infection, unspecified site                                                        |
| A49.2 | Haemophilus influenzae infection, unspecified site                                                |
| A50*  | Congenital syphilis                                                                               |
| A51*  | Early syphilis                                                                                    |
| A52*  | Late syphilis                                                                                     |
| A53*  | Other and unspecified syphilis                                                                    |
| A54   | Gonococcal infection                                                                              |
| A54.0 | Gonococcal infection of lower genitourinary tract without periurethral or accessory gland abscess |
| A54.1 | Gonococcal infection of lower genitourinary tract with periurethral and accessory gland abscess   |
| A54.2 | Gonococcal pelviperitonitis and other gonococcal genitourinary infections                         |
| A54.3 | Gonococcal infection of eye                                                                       |
| A54.4 | Gonococcal infection of musculoskeletal system                                                    |
| A54.5 | Gonococcal pharyngitis                                                                            |
| A54.6 | Gonococcal infection of anus and rectum                                                           |
| A54.8 | Other gonococcal infections                                                                       |
| A54.9 | Gonococcal infection, unspecified                                                                 |
| A57*  | Chancroid                                                                                         |
| A65*  | Nonvenereal syphilis                                                                              |
| A66*  | Yaws                                                                                              |
| A67*  | Pinta [carate]                                                                                    |
| A68*  | Relapsing fevers                                                                                  |
| A69*  | Other spirochaetal infections                                                                     |

|                                           |                                                                                                |
|-------------------------------------------|------------------------------------------------------------------------------------------------|
| B95*                                      | Streptococcus and staphylococcus as the cause of diseases classified to other chapters         |
| B96.1                                     | Klebsiella pneumoniae [K. pneumoniae] as the cause of diseases classified to other chapters    |
| B96.2                                     | Escherichia coli [E. coli] as the cause of diseases classified to other chapters               |
| B96.3                                     | Haemophilus influenzae [H. influenzae] as the cause of diseases classified to other chapters   |
| B96.4                                     | Proteus (mirabilis)(morganii) as the cause of diseases classified to other chapters            |
| B96.5                                     | Pseudomonas (aeruginosa) as the cause of diseases classified to other chapters                 |
| B96.6                                     | Bacillus fragilis [B. fragilis] as the cause of diseases classified to other chapters          |
| B96.7                                     | Clostridium perfringens [C. perfringens] as the cause of diseases classified to other chapters |
| B98.0                                     | Helicobacter pylori [H.pylori] as the cause of diseases classified to other chapters           |
| B98.1                                     | Vibrio vulnificus as the cause of diseases classified to other chapters                        |
| G00.0                                     | Haemophilus meningitis                                                                         |
| G00.1                                     | Pneumococcal meningitis                                                                        |
| G00.2                                     | Streptococcal meningitis                                                                       |
| G00.3                                     | Staphylococcal meningitis                                                                      |
| J02.0                                     | Streptococcal pharyngitis                                                                      |
| J03.0                                     | Streptococcal tonsillitis                                                                      |
| J13*                                      | Pneumonia due to Streptococcus pneumoniae                                                      |
| J14*                                      | Pneumonia due to Haemophilus influenzae                                                        |
| J15.0                                     | Pneumonia due to Klebsiella pneumoniae                                                         |
| J15.1                                     | Pneumonia due to Pseudomonas                                                                   |
| J15.2                                     | Pneumonia due to staphylococcus                                                                |
| J15.3                                     | Pneumonia due to streptococcus, group B                                                        |
| J15.4                                     | Pneumonia due to other streptococci                                                            |
| J15.5                                     | Pneumonia due to Escherichia coli                                                              |
| J20.1                                     | Acute bronchitis due to Haemophilus influenzae                                                 |
| J20.2                                     | Acute bronchitis due to streptococcus                                                          |
| K67.1                                     | Gonococcal peritonitis                                                                         |
| K67.2                                     | Syphilitic peritonitis                                                                         |
| L00*                                      | Staphylococcal scalded skin syndrome                                                           |
| L01*                                      | Impetigo                                                                                       |
| M00.0                                     | Staphylococcal arthritis and polyarthritis                                                     |
| M00.1                                     | Pneumococcal arthritis and polyarthritis                                                       |
| M00.2                                     | Other streptococcal arthritis and polyarthritis                                                |
| M01.0                                     | Meningococcal arthritis                                                                        |
| M01.2                                     | Arthritis in Lyme disease                                                                      |
| M73.0                                     | Gonococcal bursitis                                                                            |
| M73.1                                     | Syphilitic bursitis                                                                            |
| N74.2                                     | Female syphilitic pelvic inflammatory disease                                                  |
| N74.3                                     | Female gonococcal pelvic inflammatory disease                                                  |
| O98.1                                     | Syphilis complicating pregnancy, childbirth and the puerperium                                 |
| O98.2                                     | Gonorrhoea complicating pregnancy, childbirth and the puerperium                               |
| P36.0                                     | Sepsis of newborn due to streptococcus, group B                                                |
| P36.1                                     | Sepsis of newborn due to other and unspecified streptococci                                    |
| P36.2                                     | Sepsis of newborn due to Staphylococcus aureus                                                 |
| P36.3                                     | Sepsis of newborn due to other and unspecified staphylococci                                   |
| P36.4                                     | Sepsis of newborn due to Escherichia coli                                                      |
| <b>Gram-positive bacterial infections</b> |                                                                                                |
| A04.7                                     | Enterocolitis due to Clostridium difficile                                                     |
| A05.0                                     | Foodborne staphylococcal intoxication                                                          |
| A05.1                                     | Botulism                                                                                       |



|                                           |                                                                                                |
|-------------------------------------------|------------------------------------------------------------------------------------------------|
| A05.2                                     | Foodborne Clostridium perfringens [Clostridium welchii] intoxication                           |
| A05.4                                     | Foodborne Bacillus cereus intoxication                                                         |
| A22*                                      | Anthrax                                                                                        |
| A26                                       | Erysipeloid                                                                                    |
| A26.0                                     | Cutaneous erysipeloid                                                                          |
| A26.7                                     | Erysipelothrix sepsis                                                                          |
| A26.8                                     | Other forms of erysipeloid                                                                     |
| A26.9                                     | Erysipeloid, unspecified                                                                       |
| A32*                                      | Listeriosis                                                                                    |
| A33*                                      | Tetanus neonatorum                                                                             |
| A34*                                      | Obstetrical tetanus                                                                            |
| A35*                                      | Other tetanus                                                                                  |
| A36*                                      | Diphtheria                                                                                     |
| A38*                                      | Scarlet fever                                                                                  |
| A40*                                      | Streptococcal sepsis                                                                           |
| A41.0                                     | Sepsis due to Staphylococcus aureus                                                            |
| A41.1                                     | Sepsis due to other specified staphylococcus                                                   |
| A41.2                                     | Sepsis due to unspecified staphylococcus                                                       |
| A42*                                      | Actinomycosis                                                                                  |
| A43*                                      | Nocardiosis                                                                                    |
| A48.0                                     | Gas gangrene                                                                                   |
| A48.3                                     | Toxic shock syndrome                                                                           |
| A49.0                                     | Staphylococcal infection, unspecified site                                                     |
| A49.1                                     | Streptococcal infection, unspecified site                                                      |
| B95*                                      | Streptococcus and staphylococcus as the cause of diseases classified to other chapters         |
| B96.7                                     | Clostridium perfringens [C. perfringens] as the cause of diseases classified to other chapters |
| G00.1                                     | Pneumococcal meningitis                                                                        |
| G00.2                                     | Streptococcal meningitis                                                                       |
| G00.3                                     | Staphylococcal meningitis                                                                      |
| J02.0                                     | Streptococcal pharyngitis                                                                      |
| J03.0                                     | Streptococcal tonsillitis                                                                      |
| J13*                                      | Pneumonia due to Streptococcus pneumoniae                                                      |
| J15.2                                     | Pneumonia due to staphylococcus                                                                |
| J15.3                                     | Pneumonia due to streptococcus, group B                                                        |
| J15.4                                     | Pneumonia due to other streptococci                                                            |
| J20.2                                     | Acute bronchitis due to streptococcus                                                          |
| L00*                                      | Staphylococcal scalded skin syndrome                                                           |
| L01*                                      | Impetigo                                                                                       |
| M00.0                                     | Staphylococcal arthritis and polyarthritis                                                     |
| M00.1                                     | Pneumococcal arthritis and polyarthritis                                                       |
| M00.2                                     | Other streptococcal arthritis and polyarthritis                                                |
| P36.0                                     | Sepsis of newborn due to streptococcus, group B                                                |
| P36.1                                     | Sepsis of newborn due to other and unspecified streptococci                                    |
| P36.2                                     | Sepsis of newborn due to Staphylococcus aureus                                                 |
| P36.3                                     | Sepsis of newborn due to other and unspecified staphylococci                                   |
| P37.2                                     | Neonatal (disseminated) listeriosis                                                            |
| <b>Gram-negative bacterial infections</b> |                                                                                                |
| A00*                                      | Cholera                                                                                        |
| A01*                                      | Typhoid and paratyphoid fevers                                                                 |
| A02*                                      | Other salmonella infections                                                                    |

|       |                                                                                                   |
|-------|---------------------------------------------------------------------------------------------------|
| A03*  | Shigellosis                                                                                       |
| A04.0 | Enteropathogenic Escherichia coli infection                                                       |
| A04.1 | Enterotoxigenic Escherichia coli infection                                                        |
| A04.2 | Enteroinvasive Escherichia coli infection                                                         |
| A04.3 | Enterohaemorrhagic Escherichia coli infection                                                     |
| A04.4 | Other intestinal Escherichia coli infections                                                      |
| A04.5 | Campylobacter enteritis                                                                           |
| A04.6 | Enteritis due to Yersinia enterocolitica                                                          |
| A05.3 | Foodborne Vibrio parahaemolyticus intoxication                                                    |
| A20*  | Plague                                                                                            |
| A21*  | Tularaemia                                                                                        |
| A23*  | Brucellosis                                                                                       |
| A24*  | Glanders and melioidosis                                                                          |
| A25*  | Rat-bite fevers                                                                                   |
| A27*  | Leptospirosis                                                                                     |
| A28.0 | Pasteurellosis                                                                                    |
| A28.1 | Cat-scratch disease                                                                               |
| A28.2 | Extraintestinal yersiniosis                                                                       |
| A37*  | Whooping cough                                                                                    |
| A39*  | Meningococcal infection                                                                           |
| A41.3 | Sepsis due to Haemophilus influenzae                                                              |
| A41.5 | Sepsis due to other Gram-negative organisms                                                       |
| A44*  | Bartonellosis                                                                                     |
| A48.1 | Legionnaires disease                                                                              |
| A48.2 | Nonpneumonic Legionnaires disease [Pontiac fever]                                                 |
| A48.4 | Brazilian purpuric fever                                                                          |
| A49.2 | Haemophilus influenzae infection, unspecified site                                                |
| A50*  | Congenital syphilis                                                                               |
| A51*  | Early syphilis                                                                                    |
| A52*  | Late syphilis                                                                                     |
| A53*  | Other and unspecified syphilis                                                                    |
| A54   | Gonococcal infection                                                                              |
| A54.0 | Gonococcal infection of lower genitourinary tract without periurethral or accessory gland abscess |
| A54.1 | Gonococcal infection of lower genitourinary tract with periurethral and accessory gland abscess   |
| A54.2 | Gonococcal pelviperitonitis and other gonococcal genitourinary infections                         |
| A54.3 | Gonococcal infection of eye                                                                       |
| A54.4 | Gonococcal infection of musculoskeletal system                                                    |
| A54.5 | Gonococcal pharyngitis                                                                            |
| A54.6 | Gonococcal infection of anus and rectum                                                           |
| A54.8 | Other gonococcal infections                                                                       |
| A54.9 | Gonococcal infection, unspecified                                                                 |
| A55*  | Chlamydial lymphogranuloma (venereum)                                                             |
| A56.0 | Chlamydial infection of lower genitourinary tract                                                 |
| A56.1 | Chlamydial infection of pelviperitoneum and other genitourinary organs                            |
| A56.2 | Chlamydial infection of genitourinary tract, unspecified                                          |
| A56.3 | Chlamydial infection of anus and rectum                                                           |
| A56.4 | Chlamydial infection of pharynx                                                                   |
| A56.8 | Sexually transmitted chlamydial infection of other sites                                          |
| A57*  | Chancroid                                                                                         |
| A58*  | Granuloma inguinale                                                                               |
| A65*  | Nonvenereal syphilis                                                                              |

|                                 |                                                                                              |
|---------------------------------|----------------------------------------------------------------------------------------------|
| A66*                            | Yaws                                                                                         |
| A67*                            | Pinta [carate]                                                                               |
| A68*                            | Relapsing fevers                                                                             |
| A69*                            | Other spirochaetal infections                                                                |
| A70*                            | Chlamydia psittaci infection                                                                 |
| A71*                            | Trachoma                                                                                     |
| A74.0                           | Chlamydial conjunctivitis                                                                    |
| A74.8                           | Other chlamydial diseases                                                                    |
| A74.9                           | Chlamydial infection, unspecified                                                            |
| A75*                            | Typhus fever                                                                                 |
| A77*                            | Spotted fever [tick-borne rickettsioses]                                                     |
| A78*                            | Q fever                                                                                      |
| A79*                            | Other rickettsioses                                                                          |
| B96.1                           | Klebsiella pneumoniae [K. pneumoniae] as the cause of diseases classified to other chapters  |
| B96.2                           | Escherichia coli [E. coli] as the cause of diseases classified to other chapters             |
| B96.3                           | Haemophilus influenzae [H. influenzae] as the cause of diseases classified to other chapters |
| B96.4                           | Proteus (mirabilis)(morganii) as the cause of diseases classified to other chapters          |
| B96.5                           | Pseudomonas (aeruginosa) as the cause of diseases classified to other chapters               |
| B96.6                           | Bacillus fragilis [B. fragilis] as the cause of diseases classified to other chapters        |
| B98.0                           | Helicobacter pylori [H.pylori] as the cause of diseases classified to other chapters         |
| B98.1                           | Vibrio vulnificus as the cause of diseases classified to other chapters                      |
| G00.0                           | Haemophilus meningitis                                                                       |
| J14*                            | Pneumonia due to Haemophilus influenzae                                                      |
| J15.0                           | Pneumonia due to Klebsiella pneumoniae                                                       |
| J15.1                           | Pneumonia due to Pseudomonas                                                                 |
| J15.5                           | Pneumonia due to Escherichia coli                                                            |
| J15.6                           | Pneumonia due to other aerobic Gram-negative bacteria                                        |
| J16.0                           | Chlamydial pneumonia                                                                         |
| J20.1                           | Acute bronchitis due to Haemophilus influenzae                                               |
| K67.0                           | Chlamydial peritonitis                                                                       |
| K67.1                           | Gonococcal peritonitis                                                                       |
| K67.2                           | Syphilitic peritonitis                                                                       |
| M01.0                           | Meningococcal arthritis                                                                      |
| M01.2                           | Arthritis in Lyme disease                                                                    |
| M49.1                           | Brucella spondylitis                                                                         |
| M49.2                           | Enterobacterial spondylitis                                                                  |
| M73.0                           | Gonococcal bursitis                                                                          |
| M73.1                           | Syphilitic bursitis                                                                          |
| N29.0                           | Late syphilis of kidney                                                                      |
| N74.2                           | Female syphilitic pelvic inflammatory disease                                                |
| N74.3                           | Female gonococcal pelvic inflammatory disease                                                |
| N74.4                           | Female chlamydial pelvic inflammatory disease                                                |
| O98.1                           | Syphilis complicating pregnancy, childbirth and the puerperium                               |
| O98.2                           | Gonorrhoea complicating pregnancy, childbirth and the puerperium                             |
| P36.4                           | Sepsis of newborn due to Escherichia coli                                                    |
| <b>Meningococcal infections</b> |                                                                                              |
| A39*                            | Meningococcal infection                                                                      |
| M01.0                           | Meningococcal arthritis                                                                      |

**Infections caused by spirochaetes and leptospira**

|       |                                                                |
|-------|----------------------------------------------------------------|
| A27*  | Leptospirosis                                                  |
| A50*  | Congenital syphilis                                            |
| A51*  | Early syphilis                                                 |
| A52*  | Late syphilis                                                  |
| A53*  | Other and unspecified syphilis                                 |
| A65*  | Nonvenereal syphilis                                           |
| A66*  | Yaws                                                           |
| A67*  | Pinta [carate]                                                 |
| A68*  | Relapsing fevers                                               |
| A69*  | Other spirochaetal infections                                  |
| K67.2 | Syphilitic peritonitis                                         |
| M01.2 | Arthritis in Lyme disease                                      |
| M73.1 | Syphilitic bursitis                                            |
| N29.0 | Late syphilis of kidney                                        |
| N74.2 | Female syphilitic pelvic inflammatory disease                  |
| O98.1 | Syphilis complicating pregnancy, childbirth and the puerperium |

---

**Gram-negative bacterial infections excluding those with known neurological sequelae**

|       |                                                                                                   |
|-------|---------------------------------------------------------------------------------------------------|
| A00*  | Cholera                                                                                           |
| A01*  | Typhoid and paratyphoid fevers                                                                    |
| A02*  | Other salmonella infections                                                                       |
| A03*  | Shigellosis                                                                                       |
| A04.0 | Enteropathogenic Escherichia coli infection                                                       |
| A04.1 | Enterotoxigenic Escherichia coli infection                                                        |
| A04.2 | Enteroinvasive Escherichia coli infection                                                         |
| A04.3 | Enterohaemorrhagic Escherichia coli infection                                                     |
| A04.4 | Other intestinal Escherichia coli infections                                                      |
| A04.5 | Campylobacter enteritis                                                                           |
| A04.6 | Enteritis due to Yersinia enterocolitica                                                          |
| A05.3 | Foodborne Vibrio parahaemolyticus intoxication                                                    |
| A20*  | Plague                                                                                            |
| A21*  | Tularaemia                                                                                        |
| A23*  | Brucellosis                                                                                       |
| A24*  | Glanders and melioidosis                                                                          |
| A25*  | Rat-bite fevers                                                                                   |
| A28.0 | Pasteurellosis                                                                                    |
| A28.1 | Cat-scratch disease                                                                               |
| A28.2 | Extraintestinal yersiniosis                                                                       |
| A37*  | Whooping cough                                                                                    |
| A39*  | Meningococcal infection                                                                           |
| A41.3 | Sepsis due to Haemophilus influenzae                                                              |
| A41.5 | Sepsis due to other Gram-negative organisms                                                       |
| A44*  | Bartonellosis                                                                                     |
| A48.1 | Legionnaires disease                                                                              |
| A48.2 | Nonpneumonic Legionnaires disease [Pontiac fever]                                                 |
| A48.4 | Brazilian purpuric fever                                                                          |
| A49.2 | Haemophilus influenzae infection, unspecified site                                                |
| A54*  | Gonococcal infection                                                                              |
| A54   | Gonococcal infection                                                                              |
| A54.0 | Gonococcal infection of lower genitourinary tract without periurethral or accessory gland abscess |
| A54.1 | Gonococcal infection of lower genitourinary tract with periurethral and accessory gland abscess   |

|       |                                                                                              |
|-------|----------------------------------------------------------------------------------------------|
| A54.2 | Gonococcal pelviperitonitis and other gonococcal genitourinary infections                    |
| A54.3 | Gonococcal infection of eye                                                                  |
| A54.4 | Gonococcal infection of musculoskeletal system                                               |
| A54.5 | Gonococcal pharyngitis                                                                       |
| A54.6 | Gonococcal infection of anus and rectum                                                      |
| A54.8 | Other gonococcal infections                                                                  |
| A54.9 | Gonococcal infection, unspecified                                                            |
| A55*  | Chlamydial lymphogranuloma (venereum)                                                        |
| A56.0 | Chlamydial infection of lower genitourinary tract                                            |
| A56.1 | Chlamydial infection of pelviperitoneum and other genitourinary organs                       |
| A56.2 | Chlamydial infection of genitourinary tract, unspecified                                     |
| A56.3 | Chlamydial infection of anus and rectum                                                      |
| A56.4 | Chlamydial infection of pharynx                                                              |
| A56.8 | Sexually transmitted chlamydial infection of other sites                                     |
| A57*  | Chancroid                                                                                    |
| A58*  | Granuloma inguinale                                                                          |
| A70*  | Chlamydia psittaci infection                                                                 |
| A71*  | Trachoma                                                                                     |
| A74.0 | Chlamydial conjunctivitis                                                                    |
| A74.8 | Other chlamydial diseases                                                                    |
| A74.9 | Chlamydial infection, unspecified                                                            |
| A75*  | Typhus fever                                                                                 |
| A77*  | Spotted fever [tick-borne rickettsioses]                                                     |
| A78*  | Q fever                                                                                      |
| A79*  | Other rickettsioses                                                                          |
| B96.1 | Klebsiella pneumoniae [K. pneumoniae] as the cause of diseases classified to other chapters  |
| B96.2 | Escherichia coli [E. coli] as the cause of diseases classified to other chapters             |
| B96.3 | Haemophilus influenzae [H. influenzae] as the cause of diseases classified to other chapters |
| B96.4 | Proteus (mirabilis)(morganii) as the cause of diseases classified to other chapters          |
| B96.5 | Pseudomonas (aeruginosa) as the cause of diseases classified to other chapters               |
| B96.6 | Bacillus fragilis [B. fragilis] as the cause of diseases classified to other chapters        |
| B98.0 | Helicobacter pylori [H.pylori] as the cause of diseases classified to other chapters         |
| B98.1 | Vibrio vulnificus as the cause of diseases classified to other chapters                      |
| G00.0 | Haemophilus meningitis                                                                       |
| J14*  | Pneumonia due to Haemophilus influenzae                                                      |
| J15.0 | Pneumonia due to Klebsiella pneumoniae                                                       |
| J15.1 | Pneumonia due to Pseudomonas                                                                 |
| J15.5 | Pneumonia due to Escherichia coli                                                            |
| J15.6 | Pneumonia due to other aerobic Gram-negative bacteria                                        |
| J16.0 | Chlamydial pneumonia                                                                         |
| J20.1 | Acute bronchitis due to Haemophilus influenzae                                               |
| K67.0 | Chlamydial peritonitis                                                                       |
| K67.1 | Gonococcal peritonitis                                                                       |
| M01.0 | Meningococcal arthritis                                                                      |
| M49.1 | Brucella spondylitis                                                                         |
| M49.2 | Enterobacterial spondylitis                                                                  |
| M73.0 | Gonococcal bursitis                                                                          |
| N74.3 | Female gonococcal pelvic inflammatory disease                                                |
| N74.4 | Female chlamydial pelvic inflammatory disease                                                |
| O98.2 | Gonorrhoea complicating pregnancy, childbirth and the puerperium                             |
| P36.4 | Sepsis of newborn due to Escherichia coli                                                    |

---

**Mycobacterial infections**

---

|       |                                                                             |
|-------|-----------------------------------------------------------------------------|
| A15*  | Respiratory tuberculosis, bacteriologically and histologically confirmed    |
| A16*  | Respiratory tuberculosis, not confirmed bacteriologically or histologically |
| A17*  | Tuberculosis of nervous system                                              |
| A18*  | Tuberculosis of other organs                                                |
| A19*  | Miliary tuberculosis                                                        |
| A30*  | Leprosy [Hansen disease]                                                    |
| A31*  | Infection due to other mycobacteria                                         |
| K23.0 | Tuberculous oesophagitis                                                    |
| K67.3 | Tuberculous peritonitis                                                     |
| M01.1 | Tuberculous arthritis                                                       |
| M49.0 | Tuberculosis of spine                                                       |
| N74.0 | Tuberculous infection of cervix uteri                                       |
| N74.1 | Female tuberculous pelvic inflammatory disease                              |
| O98.0 | Tuberculosis complicating pregnancy, childbirth and the puerperium          |
| P37.0 | Congenital tuberculosis                                                     |

---

**Mycoplasma infections**

---

|       |                                                                                             |
|-------|---------------------------------------------------------------------------------------------|
| A49.3 | Mycoplasma infection, unspecified site                                                      |
| B96.0 | Mycoplasma pneumoniae [M. pneumoniae] as the cause of diseases classified to other chapters |
| J15.7 | Pneumonia due to Mycoplasma pneumoniae                                                      |
| J20.0 | Acute bronchitis due to Mycoplasma pneumoniae                                               |

---

**All viral infections**

---

|       |                                                                            |
|-------|----------------------------------------------------------------------------|
| A08.0 | Rotaviral enteritis                                                        |
| A08.1 | Acute gastroenteropathy due to Norwalk agent                               |
| A08.2 | Adenoviral enteritis                                                       |
| A08.3 | Other viral enteritis                                                      |
| A08.4 | Viral intestinal infection, unspecified                                    |
| A60*  | Anogenital herpesviral [herpes simplex] infection                          |
| A63.0 | Anogenital (venereal) warts                                                |
| A80   | Acute poliomyelitis                                                        |
| A81.2 | Progressive multifocal leukoencephalopathy                                 |
| A83*  | Mosquito-borne viral encephalitis                                          |
| A84*  | Tick-borne viral encephalitis                                              |
| A85*  | Other viral encephalitis, not elsewhere classified                         |
| A86*  | Unspecified viral encephalitis                                             |
| A87*  | Viral meningitis                                                           |
| A88*  | Other viral infections of central nervous system, not elsewhere classified |
| A89*  | Unspecified viral infection of central nervous system                      |
| A90*  | Dengue fever [classical dengue]                                            |
| A91*  | Dengue haemorrhagic fever                                                  |
| A92*  | Other mosquito-borne viral fevers                                          |
| A93*  | Other arthropod-borne viral fevers, not elsewhere classified               |
| A94*  | Unspecified arthropod-borne viral fever                                    |
| A95*  | Yellow fever                                                               |
| A96*  | Arenaviral haemorrhagic fever                                              |
| A97*  | Dengue                                                                     |
| A98*  | Other viral haemorrhagic fevers, not elsewhere classified                  |
| A99*  | Unspecified viral haemorrhagic fever                                       |

|       |                                                                                                    |
|-------|----------------------------------------------------------------------------------------------------|
| B00*  | Herpesviral [herpes simplex] infections                                                            |
| B01*  | Varicella [chickenpox]                                                                             |
| B02*  | Zoster [herpes zoster]                                                                             |
| B03*  | Smallpox                                                                                           |
| B04*  | Monkeypox                                                                                          |
| B05*  | Measles                                                                                            |
| B06*  | Rubella [German measles]                                                                           |
| B07*  | Viral warts                                                                                        |
| B08*  | Other viral infections characterized by skin and mucous membrane lesions, not elsewhere classified |
| B09*  | Unspecified viral infection characterized by skin and mucous membrane lesions                      |
| B15*  | Acute hepatitis A                                                                                  |
| B16*  | Acute hepatitis B                                                                                  |
| B17*  | Other acute viral hepatitis                                                                        |
| B18*  | Chronic viral hepatitis                                                                            |
| B19*  | Unspecified viral hepatitis                                                                        |
| B20*  | Human immunodeficiency virus [HIV] disease resulting in infectious and parasitic diseases          |
| B21*  | Human immunodeficiency virus [HIV] disease resulting in malignant neoplasms                        |
| B22*  | Human immunodeficiency virus [HIV] disease resulting in other specified diseases                   |
| B23*  | Human immunodeficiency virus [HIV] disease resulting in other conditions                           |
| B24*  | Unspecified human immunodeficiency virus [HIV] disease                                             |
| B25*  | Cytomegaloviral disease                                                                            |
| B27*  | Infectious mononucleosis                                                                           |
| B30*  | Viral conjunctivitis                                                                               |
| B33*  | Other viral diseases, not elsewhere classified                                                     |
| B34*  | Viral infection of unspecified site                                                                |
| B97*  | Viral agents as the cause of diseases classified to other chapters                                 |
| G02.0 | Meningitis in viral diseases classified elsewhere                                                  |
| G04.1 | Tropical spastic paraplegia                                                                        |
| G05.1 | Encephalitis, myelitis and encephalomyelitis in viral diseases classified elsewhere                |
| H19.1 | Herpesviral keratitis and keratoconjunctivitis                                                     |
| H62.1 | Otitis externa in viral diseases classified elsewhere                                              |
| H67.1 | Otitis media in viral diseases classified elsewhere                                                |
| I41.1 | Myocarditis in viral diseases classified elsewhere                                                 |
| J05.0 | Acute obstructive laryngitis [croup]                                                               |
| J09*  | Influenza due to certain identified influenza virus                                                |
| J10*  | Influenza due to other identified influenza virus                                                  |
| J11*  | Influenza, virus not identified                                                                    |
| J12*  | Viral pneumonia, not elsewhere classified                                                          |
| J17.1 | Pneumonia in viral diseases classified elsewhere                                                   |
| J20.3 | Acute bronchitis due to coxsackievirus                                                             |
| J20.4 | Acute bronchitis due to parainfluenza virus                                                        |
| J20.5 | Acute bronchitis due to respiratory syncytial virus                                                |
| J20.6 | Acute bronchitis due to rhinovirus                                                                 |
| J20.7 | Acute bronchitis due to echovirus                                                                  |
| J21*  | Acute bronchiolitis                                                                                |
| J21.0 | Acute bronchiolitis due to respiratory syncytial virus                                             |
| J21.1 | Acute bronchiolitis due to human metapneumovirus                                                   |
| J21.8 | Acute bronchiolitis due to other specified organisms                                               |
| J21.9 | Acute bronchiolitis, unspecified                                                                   |
| M01.4 | Rubella arthritis                                                                                  |
| M01.5 | Arthritis in other viral diseases classified elsewhere                                             |

|       |                                                                                                  |
|-------|--------------------------------------------------------------------------------------------------|
| O26.4 | Herpes gestationis                                                                               |
| O98.4 | Viral hepatitis complicating pregnancy, childbirth and the puerperium                            |
| O98.5 | Other viral diseases complicating pregnancy, childbirth and the puerperium                       |
| O98.7 | Human immunodeficiency virus [HIV] disease complicating pregnancy, childbirth and the puerperium |
| P35.0 | Congenital rubella syndrome                                                                      |
| P35.1 | Congenital cytomegalovirus infection                                                             |
| P35.2 | Congenital herpesviral [herpes simplex] infection                                                |
| P35.3 | Congenital viral hepatitis                                                                       |

---

#### **Herpesvirus infections**

|       |                                                   |
|-------|---------------------------------------------------|
| A60*  | Anogenital herpesviral [herpes simplex] infection |
| B00*  | Herpesviral [herpes simplex] infections           |
| B01*  | Varicella [chickenpox]                            |
| B02*  | Zoster [herpes zoster]                            |
| B25*  | Cytomegaloviral disease                           |
| B27*  | Infectious mononucleosis                          |
| H19.1 | Herpesviral keratitis and keratoconjunctivitis    |
| O26.4 | Herpes gestationis                                |
| P35.1 | Congenital cytomegalovirus infection              |
| P35.2 | Congenital herpesviral [herpes simplex] infection |

---

#### **Acute viral infections**

|       |                                                                            |
|-------|----------------------------------------------------------------------------|
| A08.0 | Rotaviral enteritis                                                        |
| A08.1 | Acute gastroenteropathy due to Norwalk agent                               |
| A08.2 | Adenoviral enteritis                                                       |
| A08.3 | Other viral enteritis                                                      |
| A08.4 | Viral intestinal infection, unspecified                                    |
| A80   | Acute poliomyelitis                                                        |
| A81.2 | Progressive multifocal leukoencephalopathy                                 |
| A83*  | Mosquito-borne viral encephalitis                                          |
| A84*  | Tick-borne viral encephalitis                                              |
| A85*  | Other viral encephalitis, not elsewhere classified                         |
| A86*  | Unspecified viral encephalitis                                             |
| A87*  | Viral meningitis                                                           |
| A88*  | Other viral infections of central nervous system, not elsewhere classified |
| A89*  | Unspecified viral infection of central nervous system                      |
| A90*  | Dengue fever [classical dengue]                                            |
| A91*  | Dengue haemorrhagic fever                                                  |
| A92*  | Other mosquito-borne viral fevers                                          |
| A93*  | Other arthropod-borne viral fevers, not elsewhere classified               |
| A94*  | Unspecified arthropod-borne viral fever                                    |
| A95*  | Yellow fever                                                               |
| A96*  | Arenaviral haemorrhagic fever                                              |
| A97*  | Dengue                                                                     |
| A98*  | Other viral haemorrhagic fevers, not elsewhere classified                  |
| A99*  | Unspecified viral haemorrhagic fever                                       |
| B03*  | Smallpox                                                                   |
| B04*  | Monkeypox                                                                  |
| B05*  | Measles                                                                    |
| B06*  | Rubella [German measles]                                                   |
| B07*  | Viral warts                                                                |



|       |                                                                                                    |
|-------|----------------------------------------------------------------------------------------------------|
| B08*  | Other viral infections characterized by skin and mucous membrane lesions, not elsewhere classified |
| B09*  | Unspecified viral infection characterized by skin and mucous membrane lesions                      |
| B15*  | Acute hepatitis A                                                                                  |
| B16*  | Acute hepatitis B                                                                                  |
| B17*  | Other acute viral hepatitis                                                                        |
| B19*  | Unspecified viral hepatitis                                                                        |
| B30*  | Viral conjunctivitis                                                                               |
| B33*  | Other viral diseases, not elsewhere classified                                                     |
| B34*  | Viral infection of unspecified site                                                                |
| B97*  | Viral agents as the cause of diseases classified to other chapters                                 |
| G04.1 | Tropical spastic paraplegia                                                                        |
| G05.1 | Encephalitis, myelitis and encephalomyelitis in viral diseases classified elsewhere                |
| H67.1 | Otitis media in viral diseases classified elsewhere                                                |
| I41.1 | Myocarditis in viral diseases classified elsewhere                                                 |
| J05.0 | Acute obstructive laryngitis [croup]                                                               |
| J09*  | Influenza due to certain identified influenza virus                                                |
| J10*  | Influenza due to other identified influenza virus                                                  |
| J11*  | Influenza, virus not identified                                                                    |
| J12*  | Viral pneumonia, not elsewhere classified                                                          |
| J17.1 | Pneumonia in viral diseases classified elsewhere                                                   |
| J20.3 | Acute bronchitis due to coxsackievirus                                                             |
| J20.4 | Acute bronchitis due to parainfluenza virus                                                        |
| J20.5 | Acute bronchitis due to respiratory syncytial virus                                                |
| J20.6 | Acute bronchitis due to rhinovirus                                                                 |
| J20.7 | Acute bronchitis due to echovirus                                                                  |
| J21*  | Acute bronchiolitis                                                                                |
| J21.0 | Acute bronchiolitis due to respiratory syncytial virus                                             |
| J21.1 | Acute bronchiolitis due to human metapneumovirus                                                   |
| J21.8 | Acute bronchiolitis due to other specified organisms                                               |
| J21.9 | Acute bronchiolitis, unspecified                                                                   |
| M01.4 | Rubella arthritis                                                                                  |
| M01.5 | Arthritis in other viral diseases classified elsewhere                                             |
| O98.5 | Other viral diseases complicating pregnancy, childbirth and the puerperium                         |
| P35.0 | Congenital rubella syndrome                                                                        |

#### **Other potentially persistent viral infections**

|       |                                                                                                  |
|-------|--------------------------------------------------------------------------------------------------|
| A63.0 | Anogenital (venereal) warts                                                                      |
| B18*  | Chronic viral hepatitis                                                                          |
| B20*  | Human immunodeficiency virus [HIV] disease resulting in infectious and parasitic diseases        |
| B21*  | Human immunodeficiency virus [HIV] disease resulting in malignant neoplasms                      |
| B22*  | Human immunodeficiency virus [HIV] disease resulting in other specified diseases                 |
| B23*  | Human immunodeficiency virus [HIV] disease resulting in other conditions                         |
| B24*  | Unspecified human immunodeficiency virus [HIV] disease                                           |
| O98.4 | Viral hepatitis complicating pregnancy, childbirth and the puerperium                            |
| O98.7 | Human immunodeficiency virus [HIV] disease complicating pregnancy, childbirth and the puerperium |
| P35.3 | Congenital viral hepatitis                                                                       |

#### **Parasitic infections**

|      |                                     |
|------|-------------------------------------|
| A06* | Amoebiasis                          |
| A07* | Other protozoal intestinal diseases |
| A59* | Trichomoniasis                      |

|                                    |                                                                          |
|------------------------------------|--------------------------------------------------------------------------|
| B50*                               | Plasmodium falciparum malaria                                            |
| B51*                               | Plasmodium vivax malaria                                                 |
| B52*                               | Plasmodium malariae malaria                                              |
| B53*                               | Other parasitologically confirmed malaria                                |
| B54*                               | Unspecified malaria                                                      |
| B55*                               | Leishmaniasis                                                            |
| B56*                               | African trypanosomiasis                                                  |
| B57*                               | Chagas disease                                                           |
| B58*                               | Toxoplasmosis                                                            |
| B59*                               | Pneumocystosis                                                           |
| B60*                               | Other protozoal diseases, not elsewhere classified                       |
| B64*                               | Unspecified protozoal disease                                            |
| B65*                               | Schistosomiasis [bilharziasis]                                           |
| B66*                               | Other fluke infections                                                   |
| B67*                               | Echinococcosis                                                           |
| B68*                               | Taeniasis                                                                |
| B69*                               | Cysticercosis                                                            |
| B70*                               | Diphyllobothriasis and sparganosis                                       |
| B71*                               | Other cestode infections                                                 |
| B72*                               | Dracunculiasis                                                           |
| B73*                               | Onchocerciasis                                                           |
| B74*                               | Filariasis                                                               |
| B75*                               | Trichinellosis                                                           |
| B76*                               | Hookworm diseases                                                        |
| B77*                               | Ascariasis                                                               |
| B78*                               | Strongyloidiasis                                                         |
| B79*                               | Trichuriasis                                                             |
| B80*                               | Enterobiasis                                                             |
| B81*                               | Other intestinal helminthiases, not elsewhere classified                 |
| B82*                               | Unspecified intestinal parasitism                                        |
| B83*                               | Other helminthiases                                                      |
| B85*                               | Pediculosis and phthiriasis                                              |
| B86*                               | Scabies                                                                  |
| B87*                               | Myiasis                                                                  |
| B88*                               | Other infestations                                                       |
| B89*                               | Unspecified parasitic disease                                            |
| H06.1                              | Parasitic infestation of orbit in diseases classified elsewhere          |
| H13.0                              | Filarial infection of conjunctiva                                        |
| J17.3                              | Pneumonia in parasitic diseases                                          |
| K23.1                              | Megaoesophagus in Chagas disease                                         |
| M63.1                              | Myositis in protozoal and parasitic infections classified elsewhere      |
| O98.6                              | Protozoal diseases complicating pregnancy, childbirth and the puerperium |
| P37.1                              | Congenital toxoplasmosis                                                 |
| P37.3                              | Congenital falciparum malaria                                            |
| P37.4                              | Other congenital malaria                                                 |
| <b>Fungal infections (mycoses)</b> |                                                                          |
| B35*                               | Dermatophytosis                                                          |
| B36*                               | Other superficial mycoses                                                |
| B37*                               | Candidiasis                                                              |
| B38*                               | Coccidioidomycosis                                                       |

|       |                                         |
|-------|-----------------------------------------|
| B39*  | Histoplasmosis                          |
| B40*  | Blastomycosis                           |
| B41*  | Paracoccidioidomycosis                  |
| B42*  | Sporotrichosis                          |
| B43*  | Chromomycosis and phaeomycotic abscess  |
| B44*  | Aspergillosis                           |
| B45*  | Cryptococcosis                          |
| B46*  | Zygomycosis                             |
| B47*  | Mycetoma                                |
| B48*  | Other mycoses, not elsewhere classified |
| B49*  | Unspecified mycosis                     |
| G02.1 | Meningitis in mycoses                   |
| H62.2 | Otitis externa in mycoses               |
| J17.2 | Pneumonia in mycoses                    |
| M01.6 | Arthritis in mycoses                    |
| P37.5 | Neonatal candidiasis                    |

\*Includes the underlying 4-level codes

Abbreviations: ICD-10, International Classification of Diseases, 10th Revision.

ICD-10 disease names are from: World Health Organization. International Statistical Classification of Diseases and Related Health Problems 10th Revision [Internet]. ICD-10 Version:2016. [cited 2 Oct 2018]. Available from: <https://icd.who.int/browse10/2016/en>

**eTable 2. ICD-10 codes for infectious diseases with the corresponding ICD-8 and ICD-9 codes**

| ICD-10 code | ICD-10 description                                                   | ICD-8 code | ICD-9 code |
|-------------|----------------------------------------------------------------------|------------|------------|
| A00         | Cholera                                                              | 0010A      | 00001      |
| A00         | Cholera                                                              | 0011A      | 00010      |
| A00         | Cholera                                                              | 0019X      | 00097      |
| A00         | Cholera                                                              |            | 00099      |
| A01.0       | Typhoid fever                                                        | 0020A      | 00197      |
| A01.0       | Typhoid fever                                                        |            | 00199      |
| A01.1       | Paratyphoid fever A                                                  | 0021A      | 00200      |
| A01.2       | Paratyphoid fever B                                                  | 0022A      | 00210      |
| A01.3       | Paratyphoid fever C                                                  | 0023A      | 00220      |
| A01.4       | Paratyphoid fever, unspecified                                       | 0029X      | 0029       |
| A02         | Other salmonella infections                                          | 003        | 003        |
| A03         | Shigellosis                                                          | 004        | 004        |
| A04.1       | Enterotoxigenic Escherichia coli infection                           | 0080A      |            |
| A04.2       | Enteroinvasive Escherichia coli infection                            | 0080B      |            |
| A04.4       | Other intestinal Escherichia coli infections                         |            | 00800      |
| A04.5       | Campylobacter enteritis                                              | 0084E      |            |
| A04.6       | Enteritis due to Yersinia enterocolitica                             | 0084C      |            |
| A04.6       | Enteritis due to Yersinia enterocolitica                             | 0084D      |            |
| A04.7       | Enterocolitis due to Clostridium difficile                           | 0084F      |            |
| A04.8       | Other specified bacterial intestinal infections                      | 0081A      | 00810      |
| A04.8       | Other specified bacterial intestinal infections                      | 0082A      | 00820      |
| A04.8       | Other specified bacterial intestinal infections                      | 0083A      |            |
| A04.8       | Other specified bacterial intestinal infections                      | 0084A      |            |
| A04.8       | Other specified bacterial intestinal infections                      | 0084B      |            |
| A04.9       | Bacterial intestinal infection, unspecified                          | 0085X      | 00830      |
| A05.0       | Foodborne staphylococcal intoxication                                | 0050A      | 00500      |
| A05.1       | Botulism                                                             | 0051A      | 00510      |
| A05.2       | Foodborne Clostridium perfringens [Clostridium welchii] intoxication | 0052A      |            |
| A05.3       | Foodborne Vibrio parahaemolyticus intoxication                       | 0054A      |            |
| A05.8       | Other specified bacterial foodborne intoxications                    | 0058X      | 00580      |
| A05.9       | Bacterial foodborne intoxication, unspecified                        |            | 00597      |
| A05.9       | Bacterial foodborne intoxication, unspecified                        | 0059X      | 00599      |
| A05.9       | Bacterial foodborne intoxication, unspecified                        | 0053A      | 00520      |
| A06         | Amoebiasis                                                           | 006        | 006        |
| A07         | Other protozoal intestinal diseases                                  | 007        | 007        |
| A07.8       | Other specified protozoal intestinal diseases                        | 1365A      |            |
| A08.0       | Rotaviral enteritis                                                  | 0086A      |            |
| A08.1       | Acute gastroenteropathy due to Norwalk agent                         | 0086B      |            |
| A08.2       | Adenoviral enteritis                                                 | 0086C      |            |
| A08.3       | Other viral enteritis                                                |            | 00880      |
| A08.4       | Viral intestinal infection, unspecified                              | 0086X      | 00898      |

|       |                                                                                                               |       |       |
|-------|---------------------------------------------------------------------------------------------------------------|-------|-------|
| A08.5 | Other specified intestinal infections                                                                         | 0088X |       |
| A09   | Other gastroenteritis and colitis of infectious and unspecified origin                                        | 009   | 009   |
| A15.0 | Tuberculosis of lung, confirmed by sputum microscopy with or without culture                                  | 0110A |       |
| A15.0 | Tuberculosis of lung, confirmed by sputum microscopy with or without culture                                  | 0112A |       |
| A15.0 | Tuberculosis of lung, confirmed by sputum microscopy with or without culture                                  | 0113A |       |
| A15.0 | Tuberculosis of lung, confirmed by sputum microscopy with or without culture                                  | 0116A |       |
| A15.0 | Tuberculosis of lung, confirmed by sputum microscopy with or without culture                                  | 0118A |       |
| A15.0 | Tuberculosis of lung, confirmed by sputum microscopy with or without culture                                  | 0119A |       |
| A15.2 | Tuberculosis of lung, confirmed histologically                                                                | 0110B |       |
| A15.2 | Tuberculosis of lung, confirmed histologically                                                                | 0112B |       |
| A15.2 | Tuberculosis of lung, confirmed histologically                                                                | 0113B |       |
| A15.2 | Tuberculosis of lung, confirmed histologically                                                                | 0116B |       |
| A15.2 | Tuberculosis of lung, confirmed histologically                                                                | 0118B |       |
| A15.2 | Tuberculosis of lung, confirmed histologically                                                                | 0119B |       |
| A15.4 | Tuberculosis of intrathoracic lymph nodes, confirmed bacteriologically and histologically                     | 0121A |       |
| A15.4 | Tuberculosis of intrathoracic lymph nodes, confirmed bacteriologically and histologically                     | 0121B |       |
| A15.5 | Tuberculosis of larynx, trachea and bronchus, confirmed bacteriologically and histologically                  | 0122A |       |
| A15.5 | Tuberculosis of larynx, trachea and bronchus, confirmed bacteriologically and histologically                  | 0122B |       |
| A15.5 | Tuberculosis of larynx, trachea and bronchus, confirmed bacteriologically and histologically                  | 0123A |       |
| A15.5 | Tuberculosis of larynx, trachea and bronchus, confirmed bacteriologically and histologically                  | 0123B |       |
| A15.6 | Tuberculous pleurisy, confirmed bacteriologically and histologically                                          | 0120A |       |
| A15.6 | Tuberculous pleurisy, confirmed bacteriologically and histologically                                          | 0120B |       |
| A15.7 | Primary respiratory tuberculosis, confirmed bacteriologically and histologically                              | 0101A |       |
| A15.7 | Primary respiratory tuberculosis, confirmed bacteriologically and histologically                              | 0101B |       |
| A15.8 | Other respiratory tuberculosis, confirmed bacteriologically and histologically                                | 0128A |       |
| A15.8 | Other respiratory tuberculosis, confirmed bacteriologically and histologically                                | 0128B |       |
| A16.2 | Tuberculosis of lung, without mention of bacteriological or histological confirmation                         | 0110X | 01099 |
| A16.2 | Tuberculosis of lung, without mention of bacteriological or histological confirmation                         | 0112X | 01101 |
| A16.2 | Tuberculosis of lung, without mention of bacteriological or histological confirmation                         | 0113X | 01102 |
| A16.2 | Tuberculosis of lung, without mention of bacteriological or histological confirmation                         | 0116X | 01103 |
| A16.2 | Tuberculosis of lung, without mention of bacteriological or histological confirmation                         | 0118X | 01104 |
| A16.2 | Tuberculosis of lung, without mention of bacteriological or histological confirmation                         | 0119X | 01105 |
| A16.2 | Tuberculosis of lung, without mention of bacteriological or histological confirmation                         |       | 01106 |
| A16.2 | Tuberculosis of lung, without mention of bacteriological or histological confirmation                         |       | 01107 |
| A16.3 | Tuberculosis of intrathoracic lymph nodes, without mention of bacteriological or histological confirmation    | 0121X | 01292 |
| A16.4 | Tuberculosis of larynx, trachea and bronchus, without mention of bacteriological or histological confirmation | 0122X | 01230 |
| A16.4 | Tuberculosis of larynx, trachea and bronchus, without mention of bacteriological or histological confirmation | 0123X | 01290 |
| A16.5 | Tuberculous pleurisy, without mention of bacteriological or histological confirmation                         | 0120X | 01210 |
| A16.5 | Tuberculous pleurisy, without mention of bacteriological or histological confirmation                         |       | 01211 |
| A16.7 | Primary respiratory tuberculosis without mention of bacteriological or histological confirmation              | 0100  | 01200 |
| A16.7 | Primary respiratory tuberculosis without mention of bacteriological or histological confirmation              | 0101X |       |
| A16.8 | Other respiratory tuberculosis, without mention of bacteriological or histological confirmation               | 0128X | 01291 |
| A16.8 | Other respiratory tuberculosis, without mention of bacteriological or histological confirmation               |       | 01296 |
| A16.9 | Respiratory tuberculosis unspecified, without mention of bacteriological or histological confirmation         | 0108A |       |

|       |                                                                                                       |       |       |
|-------|-------------------------------------------------------------------------------------------------------|-------|-------|
| A16.9 | Respiratory tuberculosis unspecified, without mention of bacteriological or histological confirmation | 0108B |       |
| A16.9 | Respiratory tuberculosis unspecified, without mention of bacteriological or histological confirmation | 0109A |       |
| A16.9 | Respiratory tuberculosis unspecified, without mention of bacteriological or histological confirmation | 0109B |       |
| A16.9 | Respiratory tuberculosis unspecified, without mention of bacteriological or histological confirmation |       | 01109 |
| A16.9 | Respiratory tuberculosis unspecified, without mention of bacteriological or histological confirmation | 0108X | 01212 |
| A16.9 | Respiratory tuberculosis unspecified, without mention of bacteriological or histological confirmation | 0109X | 01297 |
| A16.9 | Respiratory tuberculosis unspecified, without mention of bacteriological or histological confirmation |       | 01797 |
| A17.0 | Tuberculous meningitis                                                                                | 0130  | 01300 |
| A17.1 | Meningeal tuberculoma                                                                                 | 0131  |       |
| A17.8 | Other tuberculosis of nervous system                                                                  | 0132  | 01390 |
| A17.8 | Other tuberculosis of nervous system                                                                  | 0133  |       |
| A17.8 | Other tuberculosis of nervous system                                                                  | 0138  |       |
| A17.9 | Tuberculosis of nervous system, unspecified                                                           | 0139  | 01397 |
| A17.9 | Tuberculosis of nervous system, unspecified                                                           |       | 01399 |
| A18.0 | Tuberculosis of bones and joints                                                                      | 015   | 015   |
| A18.1 | Tuberculosis of genitourinary system                                                                  | 016   | 016   |
| A18.2 | Tuberculous peripheral lymphadenopathy                                                                | 0172A | 01710 |
| A18.2 | Tuberculous peripheral lymphadenopathy                                                                |       | 01718 |
| A18.2 | Tuberculous peripheral lymphadenopathy                                                                |       | 01719 |
| A18.3 | Tuberculosis of intestines, peritoneum and mesenteric glands                                          | 014   | 014   |
| A18.4 | Tuberculosis of skin and subcutaneous tissue                                                          | 0170  | 0170  |
| A18.4 | Tuberculosis of skin and subcutaneous tissue                                                          | 0171A |       |
| A18.4 | Tuberculosis of skin and subcutaneous tissue                                                          | 0171B |       |
| A18.4 | Tuberculosis of skin and subcutaneous tissue                                                          | 0171C |       |
| A18.4 | Tuberculosis of skin and subcutaneous tissue                                                          | 0171D |       |
| A18.5 | Tuberculosis of eye                                                                                   | 0173A | 01720 |
| A18.5 | Tuberculosis of eye                                                                                   |       | 01721 |
| A18.5 | Tuberculosis of eye                                                                                   |       | 01722 |
| A18.5 | Tuberculosis of eye                                                                                   |       | 01723 |
| A18.5 | Tuberculosis of eye                                                                                   |       | 01729 |
| A18.6 | Tuberculosis of ear                                                                                   | 0174A | 01732 |
| A18.6 | Tuberculosis of ear                                                                                   |       | 01739 |
| A18.7 | Tuberculosis of adrenal glands                                                                        | 0176A |       |
| A18.8 | Tuberculosis of other specified organs                                                                | 0175A | 01791 |
| A18.8 | Tuberculosis of other specified organs                                                                | 0177A | 01793 |
| A18.8 | Tuberculosis of other specified organs                                                                | 0178A | 01794 |
| A18.8 | Tuberculosis of other specified organs                                                                | 0178X | 01795 |
| A18.8 | Tuberculosis of other specified organs                                                                |       | 01796 |
| A19.2 | Acute miliary tuberculosis, unspecified                                                               | 0180  | 01800 |
| A19.2 | Acute miliary tuberculosis, unspecified                                                               |       | 01810 |
| A19.9 | Miliary tuberculosis, unspecified                                                                     | 0189  | 01898 |
| A20   | Plague                                                                                                | 020   | 020   |
| A21   | Tularaemia                                                                                            | 021   | 021   |
| A22   | Anthrax                                                                                               | 022   | 022   |

|       |                                                                       |       |       |
|-------|-----------------------------------------------------------------------|-------|-------|
| A23   | Brucellosis                                                           | 023   | 023   |
| A24   | Glanders and melioidosis                                              | 024   | 024   |
| A24   | Glanders and melioidosis                                              | 025   | 025   |
| A25   | Rat-bite fevers                                                       | 026   | 026   |
| A26   | Erysipeloid                                                           | 0271A | 02710 |
| A27   | Leptospirosis                                                         | 100   | 100   |
| A28.0 | Pasteurellosis                                                        | 0272A |       |
| A28.1 | Cat-scratch disease                                                   |       |       |
| A28.1 | Cat-scratch disease                                                   | 0783A | 07930 |
| A28.2 | Extraintestinal yersiniosis                                           |       | 0391  |
| A28.8 | Other specified zoonotic bacterial diseases, not elsewhere classified | 0278X |       |
| A28.9 | Zoonotic bacterial disease, unspecified                               | 0279X | 02798 |
| A30   | Leprosy [Hansen disease]                                              | 030   | 030   |
| A31   | Infection due to other mycobacteria                                   | 031   | 031   |
| A32   | Listeriosis                                                           | 0270X | 02708 |
| A32   | Listeriosis                                                           |       | 02709 |
| A32   | Listeriosis                                                           | 0270A | 02701 |
| A33   | Tetanus neonatorum                                                    | 7713A |       |
| A34   | Obstetrical tetanus                                                   | 634   |       |
| A34   | Obstetrical tetanus                                                   | 635   |       |
| A34   | Obstetrical tetanus                                                   | 636   |       |
| A34   | Obstetrical tetanus                                                   | 637   |       |
| A34   | Obstetrical tetanus                                                   | 638   |       |
| A34   | Obstetrical tetanus                                                   | 639   |       |
| A35   | Other tetanus                                                         | 037   | 037   |
| A36   | Diphtheria                                                            | 032   | 032   |
| A37   | Whooping cough                                                        | 033   | 033   |
| A38   | Scarlet fever                                                         | 0341  | 0341  |
| A39   | Meningococcal infection                                               | 036   | 036   |
| A40.3 | Sepsis due to Streptococcus pneumoniae                                | 0382A | 03820 |
| A40.8 | Other streptococcal sepsis                                            | 0380B |       |
| A40.8 | Other streptococcal sepsis                                            | 0380X |       |
| A40.9 | Streptococcal sepsis, unspecified                                     | 0380A | 03800 |
| A41.0 | Sepsis due to Staphylococcus aureus                                   | 0381A |       |
| A41.1 | Sepsis due to other specified staphylococcus                          | 0381B |       |
| A41.2 | Sepsis due to unspecified staphylococcus                              |       | 03810 |
| A41.3 | Sepsis due to Haemophilus influenzae                                  | 0384A |       |
| A41.4 | Sepsis due to anaerobes                                               | 0383A |       |
| A41.5 | Sepsis due to other Gram-negative organisms                           | 0384B | 03880 |
| A41.5 | Sepsis due to other Gram-negative organisms                           | 0384C |       |
| A41.5 | Sepsis due to other Gram-negative organisms                           | 0384X |       |
| A41.8 | Other specified sepsis                                                | 0380C | 03888 |
| A41.8 | Other specified sepsis                                                | 0388X |       |
| A41.9 | Sepsis, unspecified                                                   |       | 0389  |

|        |                                                                                                   |       |       |
|--------|---------------------------------------------------------------------------------------------------|-------|-------|
| A42    | Actinomycosis                                                                                     | 039   |       |
| A42    | Actinomycosis                                                                                     | 0402A |       |
| A42.9  | Actinomycosis, unspecified                                                                        |       | 113   |
| A43    | Nocardiosis                                                                                       |       |       |
| A44.9  | Bartonellosis, unspecified                                                                        | 0880A | 08900 |
| A46    | Erysipelas                                                                                        | 035   | 035   |
| A48.0  | Gas gangrene                                                                                      | 0400A | 0390A |
| A48.1  | Legionnaires disease                                                                              |       |       |
| A48.2  | Nonpneumonic Legionnaires disease [Pontiac fever]                                                 |       |       |
| A48.3  | Toxic shock syndrome                                                                              |       |       |
| A48.4  | Brazilian purpuric fever                                                                          |       |       |
| A48.8  | Other specified bacterial diseases                                                                | 0401A | 03910 |
| A48.8  | Other specified bacterial diseases                                                                | 0408X |       |
| A48.8  | Other specified bacterial diseases                                                                | 0403A |       |
| A49.0  | Staphylococcal infection, unspecified site                                                        |       | 03990 |
| A49.1  | Streptococcal infection, unspecified site                                                         |       |       |
| A49.2  | Haemophilus influenzae infection, unspecified site                                                |       |       |
| A49.3  | Mycoplasma infection, unspecified site                                                            |       |       |
| A49.8  | Other bacterial infections of unspecified site                                                    |       | 03991 |
| A49.8  | Other bacterial infections of unspecified site                                                    |       | 03992 |
| A49.8  | Other bacterial infections of unspecified site                                                    |       | 03993 |
| A49.8  | Other bacterial infections of unspecified site                                                    |       | 03998 |
| A49.9  | Bacterial infection, unspecified                                                                  |       |       |
| A50    | Congenital syphilis                                                                               | 090   | 090   |
| A51    | Early syphilis                                                                                    | 091   | 091   |
| A51.5  | Early syphilis, latent                                                                            | 092   | 092   |
| A52.0  | Cardiovascular syphilis                                                                           | 093   | 093   |
| A52.1  | Symptomatic neurosyphilis                                                                         | 094   | 094   |
| A52.79 | Other symptomatic late syphilis                                                                   | 095   | 095   |
| A52.8  | Late syphilis, latent                                                                             | 096   | 096   |
| A53    | Other and unspecified syphilis                                                                    | 097   | 097   |
| A54    | Gonococcal infection                                                                              | 098   | 098   |
| A54.0  | Gonococcal infection of lower genitourinary tract without periurethral or accessory gland abscess |       | 09800 |
| A54.1  | Gonococcal infection of lower genitourinary tract with periurethral and accessory gland abscess   |       | 09802 |
| A54.1  | Gonococcal infection of lower genitourinary tract with periurethral and accessory gland abscess   |       | 09812 |
| A54.2  | Gonococcal pelviperitonitis and other gonococcal genitourinary infections                         |       | 09804 |
| A54.2  | Gonococcal pelviperitonitis and other gonococcal genitourinary infections                         |       | 09805 |
| A54.2  | Gonococcal pelviperitonitis and other gonococcal genitourinary infections                         |       | 09811 |
| A54.2  | Gonococcal pelviperitonitis and other gonococcal genitourinary infections                         |       | 09813 |
| A54.2  | Gonococcal pelviperitonitis and other gonococcal genitourinary infections                         |       | 09814 |
| A54.2  | Gonococcal pelviperitonitis and other gonococcal genitourinary infections                         |       | 09815 |
| A54.2  | Gonococcal pelviperitonitis and other gonococcal genitourinary infections                         | 0981A | 09801 |
| A54.2  | Gonococcal pelviperitonitis and other gonococcal genitourinary infections                         | 0983A | 09803 |
| A54.3  | Gonococcal infection of eye                                                                       |       | 09820 |



|       |                                                                         |       |       |
|-------|-------------------------------------------------------------------------|-------|-------|
| A54.3 | Gonococcal infection of eye                                             |       | 09821 |
| A54.3 | Gonococcal infection of eye                                             |       | 09828 |
| A54.3 | Gonococcal infection of eye                                             | 0984A |       |
| A54.4 | Gonococcal infection of musculoskeletal system                          |       | 09839 |
| A54.4 | Gonococcal infection of musculoskeletal system                          | 0985A |       |
| A54.5 | Gonococcal pharyngitis                                                  | 0986A |       |
| A54.6 | Gonococcal infection of anus and rectum                                 | 0987A |       |
| A54.8 | Other gonococcal infections                                             | 0988A |       |
| A54.8 | Other gonococcal infections                                             | 0988B |       |
| A54.8 | Other gonococcal infections                                             | 0988X |       |
| A54.9 | Gonococcal infection, unspecified                                       |       | 09816 |
| A54.9 | Gonococcal infection, unspecified                                       |       | 09818 |
| A54.9 | Gonococcal infection, unspecified                                       |       | 09888 |
| A54.9 | Gonococcal infection, unspecified                                       |       | 09899 |
| A54.9 | Gonococcal infection, unspecified                                       |       | 09810 |
| A54.9 | Gonococcal infection, unspecified                                       |       | 09809 |
| A54.9 | Gonococcal infection, unspecified                                       | 0980A | 09806 |
| A54.9 | Gonococcal infection, unspecified                                       | 0982A | 09808 |
| A55   | Chlamydial lymphogranuloma (venereum)                                   | 0991A | 09919 |
| A56.0 | Chlamydial infection of lower genitourinary tract                       | 0769A |       |
| A56.1 | Chlamydial infection of pelvisperitoneum and other genitourinary organs |       |       |
| A56.1 | Chlamydial infection of pelvisperitoneum and other genitourinary organs | 0769C |       |
| A56.2 | Chlamydial infection of genitourinary tract, unspecified                |       |       |
| A56.3 | Chlamydial infection of anus and rectum                                 | 0769B |       |
| A56.4 | Chlamydial infection of pharynx                                         | 0769E |       |
| A56.8 | Sexually transmitted chlamydial infection of other sites                |       |       |
| A57   | Chancroid                                                               | 0990A | 09909 |
| A58   | Granuloma inguinale                                                     | 0992A | 09929 |
| A59.0 | Urogenital trichomoniasis                                               | 1310A | 13197 |
| A59.0 | Urogenital trichomoniasis                                               |       | 13199 |
| A59.8 | Trichomoniasis of other sites                                           | 1318X |       |
| A59.9 | Trichomoniasis, unspecified                                             | 1319X |       |
| A60.0 | Herpesviral infection of genitalia and urogenital tract                 | 0541  | 05402 |
| A63.0 | Anogenital (venereal) warts                                             |       | 09992 |
| A63.0 | Anogenital (venereal) warts                                             | 0781C |       |
| A63.8 | Other specified predominantly sexually transmitted diseases             | 0998X | 09996 |
| A64   | Unspecified sexually transmitted disease                                | 0994A | 09990 |
| A64   | Unspecified sexually transmitted disease                                | 0999X | 09991 |
| A64   | Unspecified sexually transmitted disease                                |       | 09997 |
| A64   | Unspecified sexually transmitted disease                                |       | 09999 |
| A65   | Nonvenereal syphilis                                                    | 1040A | 10400 |
| A66   | Yaws                                                                    | 102   | 10299 |
| A67   | Pinta [carate]                                                          | 103   | 10399 |
| A68   | Relapsing fevers                                                        | 0870A | 08899 |

|       |                                                                |       |       |
|-------|----------------------------------------------------------------|-------|-------|
| A68   | Relapsing fevers                                               | 0871A |       |
| A68   | Relapsing fevers                                               | 0879X |       |
| A69   | Other spirochaetal infections                                  | 1048  | 10498 |
| A69   | Other spirochaetal infections                                  | 1049  |       |
| A69   | Other spirochaetal infections                                  | 101   | 10199 |
| A70   | Chlamydia psittaci infection                                   | 073   | 073   |
| A71   | Trachoma                                                       | 0760A | 07699 |
| A74.8 | Other chlamydial diseases                                      | 0769D |       |
| A74.9 | Chlamydial infection, unspecified                              | 0769X |       |
| A75.0 | Epidemic louse-borne typhus fever due to Rickettsia prowazekii | 080   | 080   |
| A75.1 | Recrudescence typhus [Brill disease]                           | 0811A | 08110 |
| A75.2 | Typhus fever due to Rickettsia typhi                           | 0810A | 08100 |
| A75.3 | Typhus fever due to Rickettsia tsutsugamushi                   | 0812A |       |
| A75.9 | Typhus fever, unspecified                                      | 0819X | 08197 |
| A75.9 | Typhus fever, unspecified                                      |       | 08199 |
| A77.0 | Spotted fever due to Rickettsia rickettsii                     | 0820A | 08200 |
| A77.1 | Spotted fever due to Rickettsia conorii                        | 0821A | 08210 |
| A77.8 | Other spotted fevers                                           | 0828X |       |
| A77.9 | Spotted fever, unspecified                                     | 0829X | 08229 |
| A77.9 | Spotted fever, unspecified                                     |       | 08220 |
| A78   | Q fever                                                        | 0830A | 08310 |
| A79.0 | Trench fever                                                   | 0831A | 08320 |
| A79.1 | Rickettsialpox due to Rickettsia akari                         | 0832A | 08300 |
| A79.8 | Other specified rickettsioses                                  | 0838X | 08388 |
| A79.9 | Rickettsiosis, unspecified                                     | 0839X | 08120 |
| A79.9 | Rickettsiosis, unspecified                                     |       | 08397 |
| A79.9 | Rickettsiosis, unspecified                                     |       | 08399 |
| A80   | Acute poliomyelitis                                            | 0450A | 040   |
| A80   | Acute poliomyelitis                                            | 0451A | 041   |
| A80   | Acute poliomyelitis                                            | 0452A | 042   |
| A80   | Acute poliomyelitis                                            | 0459A | 043   |
| A80   | Acute poliomyelitis                                            | 0450B |       |
| A80   | Acute poliomyelitis                                            | 0451B |       |
| A80   | Acute poliomyelitis                                            | 0452B |       |
| A80   | Acute poliomyelitis                                            | 0459B |       |
| A80   | Acute poliomyelitis                                            | 0450C |       |
| A80   | Acute poliomyelitis                                            | 0451C |       |
| A80   | Acute poliomyelitis                                            | 0452C |       |
| A80   | Acute poliomyelitis                                            | 0459C |       |
| A80   | Acute poliomyelitis                                            | 0450X |       |
| A80   | Acute poliomyelitis                                            | 0451X |       |
| A80   | Acute poliomyelitis                                            | 0452X |       |
| A80   | Acute poliomyelitis                                            | 0459X |       |
| A81.0 | Creutzfeldt-Jakob disease                                      | 0461A |       |

|       |                                                                 |       |       |
|-------|-----------------------------------------------------------------|-------|-------|
| A81.1 | Subacute sclerosing panencephalitis                             | 0462A |       |
| A81.1 | Subacute sclerosing panencephalitis                             |       | 32301 |
| A81.2 | Progressive multifocal leukoencephalopathy                      | 0463A |       |
| A81.8 | Other atypical virus infections of central nervous system       | 0460A |       |
| A81.8 | Other atypical virus infections of central nervous system       | 0468X |       |
| A81.9 | Atypical virus infection of central nervous system, unspecified | 0469X |       |
| A82   | Rabies                                                          | 071   | 071   |
| A83.0 | Japanese encephalitis                                           | 0620A | 06200 |
| A83.1 | Western equine encephalitis                                     | 0621A | 06210 |
| A83.2 | Eastern equine encephalitis                                     | 0622A | 06220 |
| A83.3 | St Louis encephalitis                                           | 0623A | 06230 |
| A83.4 | Australian encephalitis                                         | 0624A | 06240 |
| A83.5 | California encephalitis                                         | 0625A |       |
| A83.6 | Rocio virus disease                                             |       |       |
| A83.8 | Other mosquito-borne viral encephalitis                         | 0625B | 06298 |
| A83.8 | Other mosquito-borne viral encephalitis                         | 0628X |       |
| A83.9 | Mosquito-borne viral encephalitis, unspecified                  | 0629X | 06297 |
| A83.9 | Mosquito-borne viral encephalitis, unspecified                  |       | 06299 |
| A84   | Tick-borne viral encephalitis                                   | 063   | 063   |
| A85.0 | Enteroviral encephalitis                                        | 0480A | 04699 |
| A85.1 | Adenoviral encephalitis                                         | 0491A |       |
| A85.2 | Arthropod-borne viral encephalitis, unspecified                 | 0640A | 06499 |
| A85.8 | Other specified viral encephalitis                              |       | 06590 |
| A86   | Unspecified viral encephalitis                                  |       | 06599 |
| A87.0 | Enteroviral meningitis                                          | 047   | 04500 |
| A87.0 | Enteroviral meningitis                                          |       | 04510 |
| A87.0 | Enteroviral meningitis                                          |       | 04597 |
| A87.0 | Enteroviral meningitis                                          |       | 04599 |
| A87.2 | Lymphocytic choriomeningitis                                    | 0490A |       |
| A87.2 | Lymphocytic choriomeningitis                                    |       | 07920 |
| A88.8 | Other specified viral infections of central nervous system      | 0498X |       |
| A89   | Unspecified viral infection of central nervous system           | 0499X |       |
| A90   | Dengue fever [classical dengue]                                 | 061   | 061   |
| A91   | Dengue haemorrhagic fever                                       |       |       |
| A92.2 | Venezuelan equine fever                                         | 0662A |       |
| A92.8 | Other specified mosquito-borne viral fevers                     | 0663A | 06820 |
| A92.8 | Other specified mosquito-borne viral fevers                     | 0663B |       |
| A93.1 | Sandfly fever                                                   |       | 06800 |
| A93.8 | Other specified arthropod-borne viral fevers                    | 0661A | 06810 |
| A93.8 | Other specified arthropod-borne viral fevers                    | 0668X | 06898 |
| A94   | Unspecified arthropod-borne viral fever                         | 0669X |       |
| A95   | Yellow fever                                                    | 060   | 060   |
| A96   | Arenaviral haemorrhagic fever                                   |       |       |
| A96.9 | Arenaviral haemorrhagic fever, unspecified                      | 0787A |       |

|       |                                                                                                    |       |       |
|-------|----------------------------------------------------------------------------------------------------|-------|-------|
| A98.0 | Crimean-Congo haemorrhagic fever                                                                   | 0650A | 06700 |
| A98.1 | Omsk haemorrhagic fever                                                                            | 0651A | 06710 |
| A98.2 | Kyasanur Forest disease                                                                            | 0652A | 06720 |
| A98.3 | Marburg virus disease                                                                              |       |       |
| A98.4 | Ebola virus disease                                                                                |       |       |
| A98.5 | Haemorrhagic fever with renal syndrome                                                             | 0786A | 06750 |
| A98.8 | Other specified viral haemorrhagic fevers                                                          | 0653A | 06738 |
| A98.8 | Other specified viral haemorrhagic fevers                                                          | 0654A | 06740 |
| A98.8 | Other specified viral haemorrhagic fevers                                                          | 0658X |       |
| A99   | Unspecified viral haemorrhagic fever                                                               | 0659X | 06790 |
| A99   | Unspecified viral haemorrhagic fever                                                               | 0787X |       |
| B00.0 | Eczema herpeticum                                                                                  | 0540A | 05403 |
| B00.1 | Herpesviral vesicular dermatitis                                                                   | 0549X | 05400 |
| B00.1 | Herpesviral vesicular dermatitis                                                                   | 0547A |       |
| B00.2 | Herpesviral gingivostomatitis and pharyngotonsillitis                                              | 0542A | 05401 |
| B00.3 | Herpesviral meningitis                                                                             | 0543A |       |
| B00.4 | Herpesviral encephalitis                                                                           | 0543B | 05404 |
| B00.5 | Herpesviral ocular disease                                                                         | 0544  | 05405 |
| B00.7 | Disseminated herpesviral disease                                                                   | 0545A |       |
| B00.8 | Other forms of herpesviral infection                                                               | 0542B | 05406 |
| B00.8 | Other forms of herpesviral infection                                                               | 0546A |       |
| B00.8 | Other forms of herpesviral infection                                                               | 0574X |       |
| B00.8 | Other forms of herpesviral infection                                                               | 0548X |       |
| B00.9 | Herpesviral infection, unspecified                                                                 |       | 05407 |
| B00.9 | Herpesviral infection, unspecified                                                                 |       | 05409 |
| B01   | Varicella [chickenpox]                                                                             | 052   | 052   |
| B02   | Zoster [herpes zoster]                                                                             | 053   | 053   |
| B03   | Smallpox                                                                                           | 050   | 050   |
| B04   | Monkeypox                                                                                          |       |       |
| B05   | Measles                                                                                            | 055   | 055   |
| B06   | Rubella [German measles]                                                                           | 056   | 056   |
| B07   | Viral warts                                                                                        |       |       |
| B07   | Viral warts                                                                                        | 0781B | 07910 |
| B07.9 | Verruca vulgaris                                                                                   | 0781A |       |
| B08   | Other viral infections characterized by skin and mucous membrane lesions, not elsewhere classified | 051   | 051   |
| B08   | Other viral infections characterized by skin and mucous membrane lesions, not elsewhere classified | 0570A | 05700 |
| B08   | Other viral infections characterized by skin and mucous membrane lesions, not elsewhere classified | 0578A | 05710 |
| B08   | Other viral infections characterized by skin and mucous membrane lesions, not elsewhere classified | 0578X | 05788 |
| B08.1 | Molluscum contagiosum                                                                              | 0780A | 07900 |
| B08.4 | Enteroviral vesicular stomatitis with exanthem                                                     | 0743A | 07940 |
| B08.5 | Enteroviral vesicular pharyngitis                                                                  | 0740A | 07400 |
| B09   | Unspecified viral infection characterized by skin and mucous membrane lesions                      | 0579X | 05797 |
| B09   | Unspecified viral infection characterized by skin and mucous membrane lesions                      |       | 05799 |
| B15   | Acute hepatitis A                                                                                  | 0700A |       |

|       |                                                                                           |       |       |
|-------|-------------------------------------------------------------------------------------------|-------|-------|
| B15   | Acute hepatitis A                                                                         | 0701A |       |
| B16   | Acute hepatitis B                                                                         |       |       |
| B17   | Other acute viral hepatitis                                                               |       |       |
| B18   | Chronic viral hepatitis                                                                   |       |       |
| B19   | Unspecified viral hepatitis                                                               | 0702A | 07001 |
| B19   | Unspecified viral hepatitis                                                               | 0703A | 07002 |
| B19   | Unspecified viral hepatitis                                                               | 0704A | 07003 |
| B19   | Unspecified viral hepatitis                                                               | 0705A | 07004 |
| B19   | Unspecified viral hepatitis                                                               | 0706X | 07007 |
| B19   | Unspecified viral hepatitis                                                               | 0709X | 07009 |
| B20   | Human immunodeficiency virus [HIV] disease resulting in infectious and parasitic diseases |       |       |
| B21   | Human immunodeficiency virus [HIV] disease resulting in malignant neoplasms               |       |       |
| B22   | Human immunodeficiency virus [HIV] disease resulting in other specified diseases          |       |       |
| B23   | Human immunodeficiency virus [HIV] disease resulting in other conditions                  |       |       |
| B24   | Unspecified human immunodeficiency virus [HIV] disease                                    | 0788A |       |
| B24   | Unspecified human immunodeficiency virus [HIV] disease                                    | 0788B |       |
| B24   | Unspecified human immunodeficiency virus [HIV] disease                                    | 0788C |       |
| B25.0 | Cytomegaloviral pneumonitis                                                               | 0785C |       |
| B25.1 | Cytomegaloviral hepatitis                                                                 | 0785B |       |
| B25.8 | Other cytomegaloviral diseases                                                            | 0785X |       |
| B25.9 | Cytomegaloviral disease, unspecified                                                      |       | 07951 |
| B25.9 | Cytomegaloviral disease, unspecified                                                      |       | 07959 |
| B26   | Mumps                                                                                     | 072   | 072   |
| B27.0 | Gammaherpesviral mononucleosis                                                            | 0750A |       |
| B27.0 | Gammaherpesviral mononucleosis                                                            | 0750X |       |
| B27.1 | Cytomegaloviral mononucleosis                                                             | 0785A |       |
| B27.9 | Infectious mononucleosis, unspecified                                                     |       | 07501 |
| B27.9 | Infectious mononucleosis, unspecified                                                     |       | 07502 |
| B27.9 | Infectious mononucleosis, unspecified                                                     |       | 07507 |
| B27.9 | Infectious mononucleosis, unspecified                                                     |       | 07508 |
| B27.9 | Infectious mononucleosis, unspecified                                                     |       | 07509 |
| B30   | Viral conjunctivitis                                                                      | 0770A | 07800 |
| B30   | Viral conjunctivitis                                                                      | 0771A | 07810 |
| B30   | Viral conjunctivitis                                                                      | 0772A | 07820 |
| B30   | Viral conjunctivitis                                                                      | 0773A | 07880 |
| B30   | Viral conjunctivitis                                                                      | 0774A | 07899 |
| B30   | Viral conjunctivitis                                                                      | 0778X |       |
| B30   | Viral conjunctivitis                                                                      | 0779X |       |
| B33   | Other viral diseases, not elsewhere classified                                            | 0741A | 07410 |
| B33.3 | Retrovirus infections, not elsewhere classified                                           | 0788D |       |
| B33.8 | Other specified viral diseases                                                            | 0788X |       |
| B34   | Viral infection of unspecified site                                                       |       |       |
| B34.0 | Adenovirus infection, unspecified site                                                    |       | 07981 |
| B34.1 | Enterovirus infection, unspecified site                                                   |       | 07499 |

|       |                                                                     |       |       |
|-------|---------------------------------------------------------------------|-------|-------|
| B34.1 | Enterovirus infection, unspecified site                             |       | 07980 |
| B34.8 | Other viral infections of unspecified site                          |       | 07988 |
| B34.9 | Viral infection, unspecified                                        |       | 07997 |
| B34.9 | Viral infection, unspecified                                        |       | 07999 |
| B35   | Dermatophytosis                                                     | 110   | 110   |
| B36   | Other superficial mycoses                                           | 111   | 111   |
| B37   | Candidiasis                                                         | 112   | 112   |
| B38   | Coccidioidomycosis                                                  | 114   | 114   |
| B39   | Histoplasmosis                                                      | 115   | 115   |
| B40   | Blastomycosis                                                       | 116   | 116   |
| B41   | Paracoccidioidomycosis                                              |       |       |
| B42   | Sporotrichosis                                                      |       |       |
| B42.9 | Sporotrichosis, unspecified                                         | 1171A | 11710 |
| B43   | Chromomycosis and phaeomyotic abscess                               |       |       |
| B43.9 | Chromomycosis, unspecified                                          | 1172A | 11720 |
| B44   | Aspergillosis                                                       |       |       |
| B44.9 | Aspergillosis, unspecified                                          | 1173A | 11730 |
| B45.9 | Cryptococcosis, unspecified                                         | 1175A |       |
| B46.5 | Mucormycosis, unspecified                                           | 1177A |       |
| B47   | Mycetoma                                                            |       |       |
| B47.0 | Eumycetoma                                                          |       | 11740 |
| B47.9 | Mycetoma, unspecified                                               | 1174A |       |
| B48.1 | Rhinosporidiosis                                                    | 1170A | 11700 |
| B48.2 | Allescheriasis                                                      | 1176A |       |
| B48.8 | Other specified mycoses                                             | 1178A | 11788 |
| B48.8 | Other specified mycoses                                             | 1178B |       |
| B49   | Unspecified mycosis                                                 | 1179X | 11799 |
| B50   | Plasmodium falciparum malaria                                       | 0848A |       |
| B50   | Plasmodium falciparum malaria                                       | 0840A | 08400 |
| B51   | Plasmodium vivax malaria                                            | 0841A | 08410 |
| B52   | Plasmodium malariae malaria                                         | 0842A | 08420 |
| B53.0 | Plasmodium ovale malaria                                            | 0843A | 08430 |
| B53.8 | Other parasitologically confirmed malaria, not elsewhere classified | 0844X | 08488 |
| B54   | Unspecified malaria                                                 | 0845A | 08440 |
| B54   | Unspecified malaria                                                 | 0846X | 08450 |
| B54   | Unspecified malaria                                                 | 0847A | 08497 |
| B54   | Unspecified malaria                                                 | 0849X | 08499 |
| B55   | Leishmaniasis                                                       | 085   | 085   |
| B56.0 | Gambiense trypanosomiasis                                           | 0863A |       |
| B56.1 | Rhodesiense trypanosomiasis                                         | 0864A |       |
| B56.9 | African trypanosomiasis, unspecified                                | 0865A |       |
| B57   | Chagas disease                                                      |       |       |
| B57.0 | Acute Chagas disease with heart involvement                         | 0860A |       |
| B57.2 | Chagas disease (chronic) with heart involvement                     | 0861A |       |

|       |                                                 |       |       |
|-------|-------------------------------------------------|-------|-------|
| B57.2 | Chagas disease (chronic) with heart involvement | 0862A | 08699 |
| B58.0 | Toxoplasma oculopathy                           | 1302A |       |
| B58.1 | Toxoplasma hepatitis                            | 1305A |       |
| B58.2 | Toxoplasma meningoencephalitis                  | 1300A |       |
| B58.3 | Pulmonary toxoplasmosis                         | 1304A |       |
| B58.8 | Toxoplasmosis with other organ involvement      | 1303A |       |
| B58.8 | Toxoplasmosis with other organ involvement      | 1307X |       |
| B58.8 | Toxoplasmosis with other organ involvement      | 1308A |       |
| B58.9 | Toxoplasmosis, unspecified                      | 1308X | 13000 |
| B58.9 | Toxoplasmosis, unspecified                      | 1309X | 13099 |
| B59   | Pneumocystosis                                  | 1363A | 13601 |
| B60.2 | Naegleriasis                                    | 1362A |       |
| B60.8 | Other specified protozoal diseases              |       | 08799 |
| B64   | Unspecified protozoal disease                   | 0869X |       |
| B64   | Unspecified protozoal disease                   |       | 13602 |
| B65   | Schistosomiasis [bilharziasis]                  | 120   | 120   |
| B66   | Other fluke infections                          | 121   | 121   |
| B67   | Echinococcosis                                  | 122   | 122   |
| B68.0 | Taenia solium taeniasis                         | 1230A | 12300 |
| B68.1 | Taenia saginata taeniasis                       | 1232A | 12320 |
| B68.9 | Taeniasis, unspecified                          | 1233A | 12330 |
| B69   | Cysticercosis                                   |       |       |
| B69.9 | Cysticercosis, unspecified                      | 1231A | 12311 |
| B70.0 | Diphyllobothriasis                              | 1234A |       |
| B70.1 | Sparganosis                                     | 1235A | 12350 |
| B71.0 | Hymenolepiasis                                  | 1236A | 12360 |
| B71.8 | Other specified cestode infections              | 1238X | 12340 |
| B71.8 | Other specified cestode infections              |       | 12398 |
| B71.9 | Cestode infection, unspecified                  | 1239X | 12399 |
| B72   | Dracunculiasis                                  |       |       |
| B73   | Onchocerciasis                                  |       |       |
| B74   | Filariasis                                      | 125   | 125   |
| B75   | Trichinellosis                                  | 124   | 124   |
| B76   | Hookworm diseases                               | 126   | 126   |
| B77.9 | Ascariasis, unspecified                         | 1270A | 12700 |
| B78.9 | Strongyloidiasis, unspecified                   | 1272A | 12710 |
| B79   | Trichuriasis                                    | 1273A | 12720 |
| B80   | Enterobiasis                                    | 1274A | 12730 |
| B81.0 | Anisakiasis                                     | 1271A |       |
| B81.1 | Intestinal capillariasis                        | 1275A |       |
| B81.2 | Trichostrongyliasis                             | 1276A |       |
| B81.4 | Mixed intestinal helminthiasis                  | 1278X | 12750 |
| B81.8 | Other specified intestinal helminthiasis        | 1277X | 12740 |
| B82.0 | Intestinal helminthiasis, unspecified           | 1279X | 12799 |

|       |                                                                                              |       |       |
|-------|----------------------------------------------------------------------------------------------|-------|-------|
| B82.9 | Intestinal parasitism, unspecified                                                           | 1290A | 12999 |
| B82.9 | Intestinal parasitism, unspecified                                                           | 1299X |       |
| B83.0 | Visceral larva migrans                                                                       | 1280A |       |
| B83.1 | Gnathostomiasis                                                                              | 1281A |       |
| B83.8 | Other specified helminthiases                                                                | 1288X |       |
| B83.9 | Helminthiasis, unspecified                                                                   | 1289X | 12899 |
| B85   | Pediculosis and phthiriasis                                                                  | 132   | 132   |
| B85   | Pediculosis and phthiriasis                                                                  |       | 13410 |
| B86   | Scabies                                                                                      | 1330A | 13300 |
| B87.9 | Myiasis, unspecified                                                                         | 1340A | 13400 |
| B88.0 | Other acariasis                                                                              | 1338X | 13390 |
| B88.0 | Other acariasis                                                                              |       | 13398 |
| B88.2 | Other arthropod infestations                                                                 | 1341A | 13420 |
| B88.8 | Other specified infestations                                                                 | 1348X | 13498 |
| B88.9 | Infestation, unspecified                                                                     | 1339X | 13399 |
| B88.9 | Infestation, unspecified                                                                     | 1342A | 13430 |
| B89   | Unspecified parasitic disease                                                                | 1349X | 13499 |
| B95.3 | Streptococcus pneumoniae as the cause of diseases classified to other chapters               | 0412A |       |
| B95.5 | Unspecified streptococcus as the cause of diseases classified to other chapters              | 0410A |       |
| B95.8 | Unspecified staphylococcus as the cause of diseases classified to other chapters             | 0411A |       |
| B96.1 | Klebsiella pneumoniae [K. pneumoniae] as the cause of diseases classified to other chapters  | 0413A |       |
| B96.2 | Escherichia coli [E. coli] as the cause of diseases classified to other chapters             | 0414A |       |
| B96.3 | Haemophilus influenzae [H. influenzae] as the cause of diseases classified to other chapters | 0415A |       |
| B96.4 | Proteus (mirabilis)(morganii) as the cause of diseases classified to other chapters          | 0416A |       |
| B96.5 | Pseudomonas (aeruginosa) as the cause of diseases classified to other chapters               | 0417A |       |
| B97.0 | Adenovirus as the cause of diseases classified to other chapters                             | 0790A |       |
| B97.1 | Enterovirus as the cause of diseases classified to other chapters                            | 0742A | 07401 |
| B97.1 | Enterovirus as the cause of diseases classified to other chapters                            | 0748X | 07420 |
| B97.1 | Enterovirus as the cause of diseases classified to other chapters                            |       | 07421 |
| B97.1 | Enterovirus as the cause of diseases classified to other chapters                            |       | 07498 |
| B97.1 | Enterovirus as the cause of diseases classified to other chapters                            | 0791A |       |
| B97.1 | Enterovirus as the cause of diseases classified to other chapters                            | 0793A |       |
| B97.1 | Enterovirus as the cause of diseases classified to other chapters                            |       |       |
| B97.8 | Other viral agents as the cause of diseases classified to other chapters                     | 0798X |       |
| B97.8 | Other viral agents as the cause of diseases classified to other chapters                     | 0799X |       |
| B99   | Other and unspecified infectious diseases                                                    | 1364A |       |
| B99   | Other and unspecified infectious diseases                                                    | 1368X |       |
| B99   | Other and unspecified infectious diseases                                                    | 1369X |       |
| B99   | Other and unspecified infectious diseases                                                    |       | 13608 |
| B99   | Other and unspecified infectious diseases                                                    |       | 13609 |
| B99   | Other and unspecified infectious diseases                                                    | 0418X | 08990 |
| B99   | Other and unspecified infectious diseases                                                    | 0419X |       |
| B99   | Other and unspecified infectious diseases                                                    | 0888X |       |
| B99   | Other and unspecified infectious diseases                                                    | 0889X |       |



|       |                                                                                      |       |       |
|-------|--------------------------------------------------------------------------------------|-------|-------|
| D73.3 | Abscess of spleen                                                                    |       |       |
| D86.9 | Sarcoidosis, unspecified                                                             | 135   | 135   |
| E32.1 | Abscess of thymus                                                                    | 2541A |       |
| G00.0 | Haemophilus meningitis                                                               | 3200A | 32000 |
| G00.1 | Pneumococcal meningitis                                                              | 3201A | 32010 |
| G00.2 | Streptococcal meningitis                                                             | 3202A | 32080 |
| G00.3 | Staphylococcal meningitis                                                            | 3203A |       |
| G00.8 | Other bacterial meningitis                                                           | 3208X | 32088 |
| G00.9 | Bacterial meningitis, unspecified                                                    | 3209X | 32099 |
| G01   | Meningitis in bacterial diseases classified elsewhere                                |       |       |
| G02.0 | Meningitis in viral diseases classified elsewhere                                    |       |       |
| G02.1 | Meningitis in mycoses                                                                |       |       |
| G02.8 | Meningitis in other specified infectious and parasitic diseases classified elsewhere |       |       |
| G03.9 | Meningitis, unspecified                                                              | 3229X |       |
| G04.0 | Acute disseminated encephalitis                                                      | 3235A |       |
| G04.2 | Bacterial meningoencephalitis and meningomyelitis, not elsewhere classified          | 3238A |       |
| G04.8 | Other encephalitis, myelitis and encephalomyelitis                                   | 3238B |       |
| G04.8 | Other encephalitis, myelitis and encephalomyelitis                                   | 3238X | 32300 |
| G04.9 | Encephalitis, myelitis and encephalomyelitis, unspecified                            | 3239X |       |
| G04.9 | Encephalitis, myelitis and encephalomyelitis, unspecified                            |       | 32308 |
| G04.9 | Encephalitis, myelitis and encephalomyelitis, unspecified                            |       | 32309 |
| G06.0 | Intracranial abscess and granuloma                                                   | 3240A | 32200 |
| G06.1 | Intraspinal abscess and granuloma                                                    | 3241A |       |
| G06.2 | Extradural and subdural abscess, unspecified                                         | 3249X | 32201 |
| G06.2 | Extradural and subdural abscess, unspecified                                         |       | 32202 |
| G06.2 | Extradural and subdural abscess, unspecified                                         |       | 32203 |
| G07   | Intracranial and intraspinal abscess and granuloma in diseases classified elsewhere  |       |       |
| G35   | Multiple sclerosis                                                                   | 340   | 340   |
| G61.0 | Guillain-Barré syndrome                                                              | 3570A | 35401 |
| G70.0 | Myasthenia gravis                                                                    | 3580A | 73300 |
| G92   | Toxic encephalopathy                                                                 |       | 32302 |
| G93.4 | Encephalopathy, unspecified                                                          |       | 32303 |
| H00.0 | Hordeolum and other deep inflammation of eyelid                                      | 3731A | 36200 |
| H00.0 | Hordeolum and other deep inflammation of eyelid                                      |       | 36201 |
| H00.0 | Hordeolum and other deep inflammation of eyelid                                      |       | 36202 |
| H00.0 | Hordeolum and other deep inflammation of eyelid                                      |       | 36209 |
| H00.1 | Chalazion                                                                            | 3732A | 37800 |
| H01.0 | Blepharitis                                                                          |       | 36101 |
| H01.8 | Other specified inflammation of eyelid                                               | 3738X |       |
| H01.9 | Inflammation of eyelid, unspecified                                                  | 3739X | 36109 |
| H05.0 | Acute inflammation of orbit                                                          | 3760A | 36900 |
| H05.0 | Acute inflammation of orbit                                                          |       | 36901 |
| H05.0 | Acute inflammation of orbit                                                          |       | 36902 |
| H06.1 | Parasitic infestation of orbit in diseases classified elsewhere                      |       |       |

|       |                                                                                                    |       |       |
|-------|----------------------------------------------------------------------------------------------------|-------|-------|
| H10.0 | Mucopurulent conjunctivitis                                                                        | 3720A | 36000 |
| H10.5 | Blepharoconjunctivitis                                                                             | 3730A |       |
| H13.0 | Filarial infection of conjunctiva                                                                  |       |       |
| H19.1 | Herpesviral keratitis and keratoconjunctivitis                                                     |       |       |
| H19.2 | Keratitis and keratoconjunctivitis in other infectious and parasitic diseases classified elsewhere |       |       |
| H22.0 | Iridocyclitis in infectious and parasitic diseases classified elsewhere                            |       |       |
| H32.0 | Chorioretinal inflammation in infectious and parasitic diseases classified elsewhere               |       |       |
| H44.0 | Purulent endophthalmitis                                                                           | 3600A | 36600 |
| H44.0 | Purulent endophthalmitis                                                                           |       | 36601 |
| H60.0 | Abscess of external ear                                                                            |       | 38000 |
| H60.0 | Abscess of external ear                                                                            |       | 38001 |
| H60.1 | Cellulitis of external ear                                                                         | 3800A |       |
| H60.2 | Malignant otitis externa                                                                           | 3801C |       |
| H60.3 | Other infective otitis externa                                                                     | 3801A |       |
| H60.3 | Other infective otitis externa                                                                     | 3801B |       |
| H62.1 | Otitis externa in viral diseases classified elsewhere                                              |       |       |
| H62.2 | Otitis externa in mycoses                                                                          | 3801E |       |
| H62.3 | Otitis externa in other infectious and parasitic diseases classified elsewhere                     |       |       |
| H66.0 | Acute suppurative otitis media                                                                     | 3820A | 38200 |
| H67.0 | Otitis media in bacterial diseases classified elsewhere                                            |       |       |
| H67.1 | Otitis media in viral diseases classified elsewhere                                                |       |       |
| H70.0 | Acute mastoiditis                                                                                  | 3830A | 38300 |
| H75.0 | Mastoiditis in infectious and parasitic diseases classified elsewhere                              |       |       |
| I00   | Rheumatic fever without mention of heart involvement                                               | 390   | 390   |
| I01   | Rheumatic fever with heart involvement                                                             | 391   | 391   |
| I02   | Rheumatic chorea                                                                                   | 392   | 392   |
| I30.1 | Infective pericarditis                                                                             | 4209A |       |
| I32.0 | Pericarditis in bacterial diseases classified elsewhere                                            |       |       |
| I32.1 | Pericarditis in other infectious and parasitic diseases classified elsewhere                       |       |       |
| I33.0 | Acute and subacute infective endocarditis                                                          | 4210A | 42100 |
| I33.0 | Acute and subacute infective endocarditis                                                          | 4219X |       |
| I40.0 | Infective myocarditis                                                                              | 4220A |       |
| I41.0 | Myocarditis in bacterial diseases classified elsewhere                                             |       |       |
| I41.1 | Myocarditis in viral diseases classified elsewhere                                                 |       |       |
| I41.2 | Myocarditis in other infectious and parasitic diseases classified elsewhere                        |       |       |
| I43.0 | Cardiomyopathy in infectious and parasitic diseases classified elsewhere                           |       |       |
| I52.0 | Other heart disorders in bacterial diseases classified elsewhere                                   |       |       |
| I52.1 | Other heart disorders in other infectious and parasitic diseases classified elsewhere              |       |       |
| J01   | Acute sinusitis                                                                                    | 461   | 461   |
| J02.0 | Streptococcal pharyngitis                                                                          |       |       |
| J02.8 | Acute pharyngitis due to other specified organisms                                                 |       |       |
| J02.9 | Acute pharyngitis, unspecified                                                                     | 462   | 462   |
| J03.0 | Streptococcal tonsillitis                                                                          | 0340  | 0340  |
| J03.8 | Acute tonsillitis due to other specified organisms                                                 |       |       |

|       |                                                                       |       |       |
|-------|-----------------------------------------------------------------------|-------|-------|
| J03.9 | Acute tonsillitis, unspecified                                        | 463   | 463   |
| J04.0 | Acute laryngitis                                                      | 4640A | 46401 |
| J04.0 | Acute laryngitis                                                      | 4644A |       |
| J04.1 | Acute tracheitis                                                      | 4641A |       |
| J04.2 | Acute laryngotracheitis                                               | 4642A | 46403 |
| J05.0 | Acute obstructive laryngitis [croup]                                  |       |       |
| J05.1 | Acute epiglottitis                                                    | 4643A | 46404 |
| J06.9 | Acute upper respiratory infection, unspecified                        |       | 46409 |
| J11.0 | Influenza with pneumonia, virus not identified                        | 4870A | 47101 |
| J11.0 | Influenza with pneumonia, virus not identified                        |       | 47109 |
| J11.1 | Influenza with other respiratory manifestations, virus not identified | 4871A | 47201 |
| J11.1 | Influenza with other respiratory manifestations, virus not identified |       | 47202 |
| J11.1 | Influenza with other respiratory manifestations, virus not identified |       | 47209 |
| J11.8 | Influenza with other manifestations, virus not identified             | 4878X | 47099 |
| J11.8 | Influenza with other manifestations, virus not identified             |       | 47399 |
| J11.8 | Influenza with other manifestations, virus not identified             |       | 47499 |
| J12   | Viral pneumonia, not elsewhere classified                             | 480   | 480   |
| J13   | Pneumonia due to Streptococcus pneumoniae                             | 481   | 481   |
| J14   | Pneumonia due to Haemophilus influenzae                               | 4822A | 48210 |
| J15.0 | Pneumonia due to Klebsiella pneumoniae                                | 4820A | 48201 |
| J15.1 | Pneumonia due to Pseudomonas                                          | 4821A |       |
| J15.2 | Pneumonia due to staphylococcus                                       | 4824A | 48230 |
| J15.3 | Pneumonia due to streptococcus, group B                               |       |       |
| J15.4 | Pneumonia due to other streptococci                                   |       |       |
| J15.5 | Pneumonia due to Escherichia coli                                     |       |       |
| J15.6 | Pneumonia due to other aerobic Gram-negative bacteria                 |       |       |
| J15.7 | Pneumonia due to Mycoplasma pneumoniae                                | 4830A |       |
| J15.8 | Other bacterial pneumonia                                             | 4828X | 48298 |
| J15.9 | Bacterial pneumonia, unspecified                                      | 4823A | 48220 |
| J15.9 | Bacterial pneumonia, unspecified                                      | 4829X |       |
| J16.0 | Chlamydial pneumonia                                                  |       |       |
| J16.8 | Pneumonia due to other specified infectious organisms                 | 4830X | 48399 |
| J17.0 | Pneumonia in bacterial diseases classified elsewhere                  |       |       |
| J17.1 | Pneumonia in viral diseases classified elsewhere                      |       |       |
| J17.2 | Pneumonia in mycoses                                                  |       |       |
| J17.3 | Pneumonia in parasitic diseases                                       |       |       |
| J17.8 | Pneumonia in other diseases classified elsewhere                      |       |       |
| J18.0 | Bronchopneumonia, unspecified                                         |       | 48501 |
| J18.0 | Bronchopneumonia, unspecified                                         |       | 48502 |
| J18.0 | Bronchopneumonia, unspecified                                         |       | 48509 |
| J18.9 | Pneumonia, unspecified                                                | 4859X | 486   |
| J20.0 | Acute bronchitis due to Mycoplasma pneumoniae                         |       |       |
| J20.1 | Acute bronchitis due to Haemophilus influenzae                        |       |       |
| J20.2 | Acute bronchitis due to streptococcus                                 |       |       |

|       |                                                        |       |       |
|-------|--------------------------------------------------------|-------|-------|
| J20.3 | Acute bronchitis due to coxsackievirus                 |       |       |
| J20.4 | Acute bronchitis due to parainfluenza virus            |       |       |
| J20.5 | Acute bronchitis due to respiratory syncytial virus    |       |       |
| J20.6 | Acute bronchitis due to rhinovirus                     |       |       |
| J20.7 | Acute bronchitis due to echovirus                      |       |       |
| J20.8 | Acute bronchitis due to other specified organisms      |       |       |
| J20.9 | Acute bronchitis, unspecified                          | 4660A |       |
| J21.0 | Acute bronchiolitis due to respiratory syncytial virus |       |       |
| J21.1 | Acute bronchiolitis due to human metapneumovirus       |       |       |
| J21.8 | Acute bronchiolitis due to other specified organisms   |       |       |
| J21.9 | Acute bronchiolitis, unspecified                       | 4661A |       |
| J22   | Unspecified acute lower respiratory infection          |       | 46699 |
| J36   | Peritonsillar abscess                                  | 475   | 50199 |
| J39.0 | Retropharyngeal and parapharyngeal abscess             | 4782A |       |
| J39.0 | Retropharyngeal and parapharyngeal abscess             | 4782B |       |
| J39.1 | Other abscess of pharynx                               |       |       |
| J45.0 | Predominantly allergic asthma                          | 4930A |       |
| J45.1 | Nonallergic asthma                                     | 4931A |       |
| J45.9 | Asthma, unspecified                                    | 4939A | 49300 |
| J45.9 | Asthma, unspecified                                    | 4939X | 49302 |
| J45.9 | Asthma, unspecified                                    |       | 49308 |
| J45.9 | Asthma, unspecified                                    |       | 49309 |
| J46   | Status asthmaticus                                     | 4930B |       |
| J46   | Status asthmaticus                                     | 4931B |       |
| J46   | Status asthmaticus                                     | 4939B |       |
| J85.1 | Abscess of lung with pneumonia                         |       |       |
| J85.2 | Abscess of lung without pneumonia                      | 5130A | 51399 |
| J85.3 | Abscess of mediastinum                                 | 5131A | 51992 |
| J86   | Pyothorax                                              | 510   | 510   |
| J94.9 | Pleural condition, unspecified                         |       | 01220 |
| K02   | Dental caries                                          | 5210A | 52100 |
| K04.4 | Acute apical periodontitis of pulpal origin            | 5224A | 52240 |
| K04.5 | Chronic apical periodontitis                           | 5226A | 52260 |
| K04.6 | Periapical abscess with sinus                          |       |       |
| K04.7 | Periapical abscess without sinus                       | 5225A | 52250 |
| K05.0 | Acute gingivitis                                       | 5230A | 52300 |
| K05.2 | Acute periodontitis                                    | 5233A | 52330 |
| K05.3 | Chronic periodontitis                                  | 5234A | 52340 |
| K05.3 | Chronic periodontitis                                  |       | 52350 |
| K05.4 | Periodontosis                                          | 5235A |       |
| K11.3 | Abscess of salivary gland                              | 5273A | 52730 |
| K12.2 | Cellulitis and abscess of mouth                        | 5283A | 52830 |
| K23.0 | Tuberculous oesophagitis                               |       |       |
| K23.1 | Megaoesophagus in Chagas disease                       |       |       |

|       |                                                                                     |       |       |
|-------|-------------------------------------------------------------------------------------|-------|-------|
| K25   | Gastric ulcer                                                                       | 531   | 531   |
| K26   | Duodenal ulcer                                                                      | 532   | 532   |
| K27   | Peptic ulcer, site unspecified                                                      |       | 533   |
| K35   | Acute appendicitis                                                                  | 540   | 540   |
| K50   | Crohn disease [regional enteritis]                                                  | 555   | 56300 |
| K51   | Ulcerative colitis                                                                  | 556   | 56310 |
| K51   | Ulcerative colitis                                                                  |       | 56902 |
| K57.0 | Diverticular disease of small intestine with perforation and abscess                | 5620B | 56202 |
| K57.0 | Diverticular disease of small intestine with perforation and abscess                | 5620D |       |
| K57.2 | Diverticular disease of large intestine with perforation and abscess                | 5621D | 56211 |
| K57.2 | Diverticular disease of large intestine with perforation and abscess                | 5621B |       |
| K57.2 | Diverticular disease of large intestine with perforation and abscess                | 5621C |       |
| K57.4 | Diverticular disease of both small and large intestine with perforation and abscess |       |       |
| K57.8 | Diverticular disease of intestine, part unspecified, with perforation and abscess   |       |       |
| K61   | Abscess of anal and rectal regions                                                  | 566   | 566   |
| K63.0 | Abscess of intestine                                                                | 5695A | 56900 |
| K65.0 | Acute peritonitis                                                                   | 5672A | 56700 |
| K65.0 | Acute peritonitis                                                                   | 5672B | 56701 |
| K65.0 | Acute peritonitis                                                                   |       | 56702 |
| K65.0 | Acute peritonitis                                                                   |       | 56704 |
| K67   | Disorders of peritoneum in infectious diseases classified elsewhere                 |       |       |
| K75.0 | Abscess of liver                                                                    | 5720A | 57299 |
| K77.0 | Liver disorders in infectious and parasitic diseases classified elsewhere           |       |       |
| L00   | Staphylococcal scalded skin syndrome                                                |       |       |
| L01   | Impetigo                                                                            |       |       |
| L01   | Impetigo                                                                            | 6868C | 68690 |
| L01   | Impetigo                                                                            |       | 68691 |
| L02   | Cutaneous abscess, furuncle and carbuncle                                           | 680   | 680   |
| L03.0 | Cellulitis of finger and toe                                                        | 681   | 681   |
| L03.1 | Cellulitis of other parts of limb                                                   |       |       |
| L03.2 | Cellulitis of face                                                                  |       |       |
| L03.3 | Cellulitis of trunk                                                                 |       |       |
| L03.8 | Cellulitis of other sites                                                           |       |       |
| L03.9 | Cellulitis, unspecified                                                             |       |       |
| L04   | Acute lymphadenitis                                                                 | 683   | 683   |
| L05   | Pilonidal cyst                                                                      |       |       |
| L08.0 | Pyoderma                                                                            | 6860A |       |
| L08.8 | Other specified local infections of skin and subcutaneous tissue                    | 6868A |       |
| L08.8 | Other specified local infections of skin and subcutaneous tissue                    | 6868X | 68698 |
| L08.9 | Local infection of skin and subcutaneous tissue, unspecified                        | 6869X |       |
| L08.9 | Local infection of skin and subcutaneous tissue, unspecified                        | 684   | 684   |
| L10.0 | Pemphigus vulgaris                                                                  | 6944A |       |
| L10.1 | Pemphigus vegetans                                                                  | 6944D |       |
| L10.2 | Pemphigus foliaceus                                                                 | 6944C |       |

|       |                                                                           |       |       |
|-------|---------------------------------------------------------------------------|-------|-------|
| L10.4 | Pemphigus erythematosus                                                   | 6944B | 69401 |
| L10.9 | Pemphigus, unspecified                                                    |       | 69400 |
| L11.1 | Transient acantholytic dermatosis [Grover]                                | 6948B |       |
| L12.2 | Chronic bullous disease of childhood                                      | 6942A |       |
| L12.2 | Chronic bullous disease of childhood                                      | 6948A |       |
| L12.9 | Pemphigoid, unspecified                                                   | 6945A | 69402 |
| L12.9 | Pemphigoid, unspecified                                                   | 6945B |       |
| L12.9 | Pemphigoid, unspecified                                                   | 6946A |       |
| L13.0 | Dermatitis herpetiformis                                                  | 6940A |       |
| L13.1 | Subcorneal pustular dermatitis                                            | 6941A | 69404 |
| L13.8 | Other specified bullous disorders                                         | 6948X |       |
| L13.9 | Bullous disorder, unspecified                                             | 6949X | 69409 |
| L40.0 | Psoriasis vulgaris                                                        | 6961A | 69619 |
| L40.1 | Generalized pustular psoriasis                                            | 6961B | 69610 |
| L40.2 | Acrodermatitis continua                                                   | 6868B | 68695 |
| L40.2 | Acrodermatitis continua                                                   | 6961C |       |
| L40.3 | Pustulosis palmaris et plantaris                                          | 6961D | 68693 |
| L40.5 | Arthropathic psoriasis                                                    | 6960A | 69600 |
| L70.1 | Acne conglobata                                                           | 7061E |       |
| L98.0 | Pyogenic granuloma                                                        | 6861A | 68610 |
| L98.0 | Pyogenic granuloma                                                        |       | 68611 |
| M00.0 | Staphylococcal arthritis and polyarthritis                                |       |       |
| M00.1 | Pneumococcal arthritis and polyarthritis                                  |       |       |
| M00.2 | Other streptococcal arthritis and polyarthritis                           |       |       |
| M00.8 | Arthritis and polyarthritis due to other specified bacterial agents       |       |       |
| M00.9 | Pyogenic arthritis, unspecified                                           | 7110A | 71000 |
| M00.9 | Pyogenic arthritis, unspecified                                           | 7110B | 71001 |
| M00.9 | Pyogenic arthritis, unspecified                                           | 7110C | 71002 |
| M00.9 | Pyogenic arthritis, unspecified                                           | 7110D | 71003 |
| M00.9 | Pyogenic arthritis, unspecified                                           | 7110E | 71004 |
| M00.9 | Pyogenic arthritis, unspecified                                           | 7110F | 71005 |
| M00.9 | Pyogenic arthritis, unspecified                                           | 7110G | 71006 |
| M00.9 | Pyogenic arthritis, unspecified                                           | 7110H | 71007 |
| M00.9 | Pyogenic arthritis, unspecified                                           | 7110K | 71008 |
| M00.9 | Pyogenic arthritis, unspecified                                           | 7110L | 71009 |
| M00.9 | Pyogenic arthritis, unspecified                                           | 7110X |       |
| M01.0 | Meningococcal arthritis                                                   |       |       |
| M01.1 | Tuberculous arthritis                                                     |       |       |
| M01.2 | Arthritis in Lyme disease                                                 |       |       |
| M01.3 | Arthritis in other bacterial diseases classified elsewhere                |       |       |
| M01.4 | Rubella arthritis                                                         |       |       |
| M01.5 | Arthritis in other viral diseases classified elsewhere                    |       |       |
| M01.6 | Arthritis in mycoses                                                      |       |       |
| M01.8 | Arthritis in other infectious and parasitic diseases classified elsewhere |       |       |

|       |                                                                     |       |       |
|-------|---------------------------------------------------------------------|-------|-------|
| M02.1 | Postdysenteric arthropathy                                          | 7113  |       |
| M02.3 | Reiter disease                                                      | 7111  | 13603 |
| M02.3 | Reiter disease                                                      | 0993A |       |
| M03.0 | Postmeningococcal arthritis                                         |       |       |
| M03.1 | Postinfective arthropathy in syphilis                               |       |       |
| M03.2 | Other postinfectious arthropathies in diseases classified elsewhere | 7115  |       |
| M03.2 | Other postinfectious arthropathies in diseases classified elsewhere | 7118  | 71490 |
| M05   | Seropositive rheumatoid arthritis                                   | 7140A |       |
| M05.0 | Felty syndrome                                                      | 7141A | 71210 |
| M05.3 | Rheumatoid arthritis with involvement of other organs and systems   | 7142X |       |
| M06   | Other rheumatoid arthritis                                          |       |       |
| M06.0 | Seronegative rheumatoid arthritis                                   | 7140B |       |
| M07   | Psoriatic and enteropathic arthropathies                            |       |       |
| M08.0 | Juvenile rheumatoid arthritis                                       | 7143B |       |
| M08.2 | Juvenile arthritis with systemic onset                              | 7143A |       |
| M08.3 | Juvenile polyarthritis (seronegative)                               | 7143C |       |
| M08.4 | Pauciarticular juvenile arthritis                                   | 7143D |       |
| M08.9 | Juvenile arthritis, unspecified                                     | 7143X | 71200 |
| M09   | Juvenile arthritis in diseases classified elsewhere                 |       |       |
| M10   | Gout                                                                | 274   | 274   |
| M11.9 | Crystal arthropathy, unspecified                                    | 7121A |       |
| M11.9 | Crystal arthropathy, unspecified                                    | 7122A |       |
| M11.9 | Crystal arthropathy, unspecified                                    | 7123X |       |
| M11.9 | Crystal arthropathy, unspecified                                    | 7128X |       |
| M11.9 | Crystal arthropathy, unspecified                                    | 7129X |       |
| M12.0 | Chronic postrheumatic arthropathy [Jaccoud]                         |       | 71250 |
| M12.3 | Palindromic rheumatism                                              |       | 71220 |
| M12.5 | Traumatic arthropathy                                               |       | 71400 |
| M12.8 | Other specific arthropathies, not elsewhere classified              |       |       |
| M13.0 | Polyarthritis, unspecified                                          | 7165A | 71493 |
| M13.1 | Monoarthritis, not elsewhere classified                             | 7166A |       |
| M13.8 | Other specified arthritis                                           |       | 71498 |
| M13.9 | Arthritis, unspecified                                              | 7168A |       |
| M13.9 | Arthritis, unspecified                                              | 7169X |       |
| M13.9 | Arthritis, unspecified                                              | 7148X | 71238 |
| M13.9 | Arthritis, unspecified                                              |       | 71239 |
| M14   | Arthropathies in other diseases classified elsewhere                |       |       |
| M30.0 | Polyarteritis nodosa                                                | 4460A | 44600 |
| M30.0 | Polyarteritis nodosa                                                | 4460C |       |
| M30.1 | Polyarteritis with lung involvement [Churg-Strauss]                 | 4460B |       |
| M30.3 | Mucocutaneous lymph node syndrome [Kawasaki]                        | 4461A |       |
| M31.0 | Hypersensitivity angiitis                                           | 4462A | 44610 |
| M31.1 | Thrombotic microangiopathy                                          | 4466A | 44640 |
| M31.3 | Wegener granulomatosis                                              | 4464A | 44620 |

|       |                                                                               |       |       |
|-------|-------------------------------------------------------------------------------|-------|-------|
| M31.4 | Aortic arch syndrome [Takayasu]                                               | 4467A |       |
| M31.6 | Other giant cell arteritis                                                    | 4465A | 44630 |
| M31.9 | Necrotizing vasculopathy, unspecified                                         |       | 44698 |
| M32.9 | Systemic lupus erythematosus, unspecified                                     | 7100A | 73410 |
| M33.0 | Juvenile dermatomyositis                                                      | 7103A |       |
| M33.1 | Other dermatomyositis                                                         | 7103B |       |
| M33.2 | Polymyositis                                                                  | 7104A |       |
| M34   | Systemic sclerosis                                                            |       |       |
| M34.0 | Progressive systemic sclerosis                                                | 7101B | 73400 |
| M34.8 | Other forms of systemic sclerosis                                             | 7101X |       |
| M34.9 | Systemic sclerosis, unspecified                                               | 7101A | 73401 |
| M34.9 | Systemic sclerosis, unspecified                                               |       | 73409 |
| M35.0 | Sicca syndrome [Sjögren]                                                      | 7102A | 73490 |
| M35.0 | Sicca syndrome [Sjögren]                                                      | 7102B |       |
| M35.2 | Behçet disease                                                                | 1361A | 13607 |
| M35.3 | Polymyalgia rheumatica                                                        |       | 44638 |
| M35.8 | Other specified systemic involvement of connective tissue                     | 7108X | 73498 |
| M35.9 | Systemic involvement of connective tissue, unspecified                        | 7109X | 73491 |
| M35.9 | Systemic involvement of connective tissue, unspecified                        |       | 73499 |
| M36   | Systemic disorders of connective tissue in diseases classified elsewhere      |       |       |
| M45   | Ankylosing spondylitis                                                        | 7200A | 71240 |
| M46.1 | Sacroiliitis, not elsewhere classified                                        | 7202A |       |
| M46.2 | Osteomyelitis of vertebra                                                     | 7208A |       |
| M46.3 | Infection of intervertebral disc (pyogenic)                                   |       |       |
| M46.5 | Other infective spondylopathies                                               |       |       |
| M46.9 | Inflammatory spondylopathy, unspecified                                       | 7209X |       |
| M49.0 | Tuberculosis of spine                                                         |       |       |
| M49.1 | Brucella spondylitis                                                          |       |       |
| M49.2 | Enterobacterial spondylitis                                                   |       |       |
| M49.3 | Spondylopathy in other infectious and parasitic diseases classified elsewhere |       |       |
| M60.0 | Infective myositis                                                            | 7280A |       |
| M63.0 | Myositis in bacterial diseases classified elsewhere                           |       |       |
| M63.1 | Myositis in protozoal and parasitic infections classified elsewhere           |       |       |
| M63.2 | Myositis in other infectious diseases classified elsewhere                    |       |       |
| M65.0 | Abscess of tendon sheath                                                      |       |       |
| M65.1 | Other infective (teno)synovitis                                               |       |       |
| M71.0 | Abscess of bursa                                                              |       |       |
| M71.1 | Other infective bursitis                                                      |       |       |
| M73.0 | Gonococcal bursitis                                                           |       |       |
| M73.1 | Syphilitic bursitis                                                           |       |       |
| M86   | Osteomyelitis                                                                 | 7300  | 72000 |
| M86   | Osteomyelitis                                                                 | 7301  | 72010 |
| M86   | Osteomyelitis                                                                 | 7302  | 72029 |
| M86   | Osteomyelitis                                                                 | 7303  | 72030 |



|       |                                                                                                  |       |       |
|-------|--------------------------------------------------------------------------------------------------|-------|-------|
| M86   | Osteomyelitis                                                                                    | 7309  | 72031 |
| M86   | Osteomyelitis                                                                                    |       | 72039 |
| N10   | Acute tubulo-interstitial nephritis                                                              |       | 59012 |
| N10   | Acute tubulo-interstitial nephritis                                                              |       | 59011 |
| N10   | Acute tubulo-interstitial nephritis                                                              | 5901A | 59010 |
| N13.6 | Pyonephrosis                                                                                     |       | 59014 |
| N13.6 | Pyonephrosis                                                                                     |       | 59013 |
| N15.1 | Renal and perinephric abscess                                                                    | 5902A | 59020 |
| N16.0 | Renal tubulo-interstitial disorders in infectious and parasitic diseases classified elsewhere    |       |       |
| N29.0 | Late syphilis of kidney                                                                          |       |       |
| N29.1 | Other disorders of kidney and ureter in infectious and parasitic diseases classified elsewhere   |       |       |
| N30.0 | Acute cystitis                                                                                   | 5950A | 59500 |
| N34.0 | Urethral abscess                                                                                 | 5970A |       |
| N39.0 | Urinary tract infection, site not specified                                                      | 5990B | 59902 |
| N41.0 | Acute prostatitis                                                                                | 6010A | 60100 |
| N41.2 | Abscess of prostate                                                                              | 6012A |       |
| N45.0 | Orchitis, epididymitis and epididymo-orchitis with abscess                                       | 6040A |       |
| N45.9 | Orchitis, epididymitis and epididymo-orchitis without abscess                                    | 6049A | 60400 |
| N45.9 | Orchitis, epididymitis and epididymo-orchitis without abscess                                    | 6049X | 60401 |
| N45.9 | Orchitis, epididymitis and epididymo-orchitis without abscess                                    |       | 60402 |
| N45.9 | Orchitis, epididymitis and epididymo-orchitis without abscess                                    |       | 60403 |
| N61   | Inflammatory disorders of breast                                                                 | 6110A | 61100 |
| N61   | Inflammatory disorders of breast                                                                 |       | 61101 |
| N70.0 | Acute salpingitis and oophoritis                                                                 | 6140  | 612   |
| N71.0 | Acute inflammatory disease of uterus                                                             | 6150A | 62200 |
| N71.0 | Acute inflammatory disease of uterus                                                             | 6150B |       |
| N73.0 | Acute parametritis and pelvic cellulitis                                                         | 6143A | 61600 |
| N73.0 | Acute parametritis and pelvic cellulitis                                                         |       | 61602 |
| N73.3 | Female acute pelvic peritonitis                                                                  | 6145A |       |
| N74.0 | Tuberculous infection of cervix uteri                                                            |       |       |
| N74.1 | Female tuberculous pelvic inflammatory disease                                                   |       |       |
| N74.2 | Female syphilitic pelvic inflammatory disease                                                    |       |       |
| N74.3 | Female gonococcal pelvic inflammatory disease                                                    |       |       |
| N74.4 | Female chlamydial pelvic inflammatory disease                                                    |       |       |
| N75.1 | Abscess of Bartholin gland                                                                       | 6163A | 62212 |
| N76.0 | Acute vaginitis                                                                                  |       |       |
| N76.2 | Acute vulvitis                                                                                   |       |       |
| N76.4 | Abscess of vulva                                                                                 | 6164A |       |
| N77.0 | Ulceration of vulva in infectious and parasitic diseases classified elsewhere                    |       |       |
| N77.1 | Vaginitis, vulvitis and vulvovaginitis in infectious and parasitic diseases classified elsewhere |       |       |
| O03.0 | Spontaneous abortion: Incomplete, complicated by genital tract and pelvic infection              |       |       |
| O03.5 | Spontaneous abortion: Complete or unspecified, complicated by genital tract and pelvic infection | 6342A |       |
| O04.5 | Medical abortion: Complete or unspecified, complicated by genital tract and pelvic infection     | 6351A |       |
| O04.5 | Medical abortion: Complete or unspecified, complicated by genital tract and pelvic infection     | 6351B |       |

|       |                                                                                                                         |       |       |
|-------|-------------------------------------------------------------------------------------------------------------------------|-------|-------|
| O04.5 | Medical abortion: Complete or unspecified, complicated by genital tract and pelvic infection                            | 6351C |       |
| O04.5 | Medical abortion: Complete or unspecified, complicated by genital tract and pelvic infection                            | 6351D |       |
| O04.5 | Medical abortion: Complete or unspecified, complicated by genital tract and pelvic infection                            | 6351X |       |
| O05.0 | Other abortion: Incomplete, complicated by genital tract and pelvic infection                                           |       |       |
| O05.5 | Other abortion: Complete or unspecified, complicated by genital tract and pelvic infection                              | 6361A |       |
| O06.0 | Unspecified abortion: Incomplete, complicated by genital tract and pelvic infection                                     |       |       |
| O06.5 | Unspecified abortion: Complete or unspecified, complicated by genital tract and pelvic infection                        |       |       |
| O07.0 | Failed medical abortion, complicated by genital tract and pelvic infection                                              |       |       |
| O07.5 | Other and unspecified failed attempted abortion, complicated by genital tract and pelvic infection                      |       |       |
| O08.0 | Genital tract and pelvic infection following abortion and ectopic and molar pregnancy                                   |       | 64590 |
| O08.0 | Genital tract and pelvic infection following abortion and ectopic and molar pregnancy                                   |       | 64591 |
| O23.0 | Infections of kidney in pregnancy                                                                                       |       |       |
| O23.1 | Infections of bladder in pregnancy                                                                                      |       |       |
| O23.2 | Infections of urethra in pregnancy                                                                                      |       |       |
| O23.3 | Infections of other parts of urinary tract in pregnancy                                                                 |       |       |
| O23.4 | Unspecified infection of urinary tract in pregnancy                                                                     |       |       |
| O23.5 | Infections of the genital tract in pregnancy                                                                            |       |       |
| O23.9 | Other and unspecified genitourinary tract infection in pregnancy                                                        | 6466A |       |
| O26.4 | Herpes gestationis                                                                                                      | 6468C | 68692 |
| O75.3 | Other infection during labour                                                                                           |       |       |
| O85   | Puerperal sepsis                                                                                                        | 670   | 670   |
| O86.0 | Infection of obstetric surgical wound                                                                                   |       |       |
| O86.1 | Other infection of genital tract following delivery                                                                     |       |       |
| O86.2 | Urinary tract infection following delivery                                                                              |       |       |
| O86.3 | Other genitourinary tract infections following delivery                                                                 |       |       |
| O86.8 | Other specified puerperal infections                                                                                    |       |       |
| O88.3 | Obstetric pyaemic and septic embolism                                                                                   | 6733  |       |
| O91.0 | Infection of nipple associated with childbirth                                                                          | 6750A |       |
| O91.0 | Infection of nipple associated with childbirth                                                                          |       |       |
| O91.1 | Abscess of breast associated with childbirth                                                                            | 6751A | 67802 |
| O98.0 | Tuberculosis complicating pregnancy, childbirth and the puerperium                                                      | 6473A |       |
| O98.1 | Syphilis complicating pregnancy, childbirth and the puerperium                                                          | 6470A |       |
| O98.2 | Gonorrhoea complicating pregnancy, childbirth and the puerperium                                                        | 6471A |       |
| O98.3 | Other infections with a predominantly sexual mode of transmission complicating pregnancy, childbirth and the puerperium | 6472X |       |
| O98.4 | Viral hepatitis complicating pregnancy, childbirth and the puerperium                                                   |       |       |
| O98.5 | Other viral diseases complicating pregnancy, childbirth and the puerperium                                              | 6476A |       |
| O98.5 | Other viral diseases complicating pregnancy, childbirth and the puerperium                                              | 6475A |       |
| O98.6 | Protozoal diseases complicating pregnancy, childbirth and the puerperium                                                |       |       |
| O98.7 | Human immunodeficiency virus [HIV] disease complicating pregnancy, childbirth and the puerperium                        |       |       |
| O98.8 | Other maternal infectious and parasitic diseases complicating pregnancy, childbirth and the puerperium                  | 6474A |       |
| O98.8 | Other maternal infectious and parasitic diseases complicating pregnancy, childbirth and the puerperium                  | 6478X |       |
| O98.9 | Unspecified maternal infectious or parasitic disease complicating pregnancy, childbirth and the puerperium              | 6479X |       |
| P23   | Congenital pneumonia                                                                                                    | 7700A |       |
| P35.0 | Congenital rubella syndrome                                                                                             | 7710A |       |

|       |                                                             |       |       |
|-------|-------------------------------------------------------------|-------|-------|
| P35.1 | Congenital cytomegalovirus infection                        | 7711A | 07950 |
| P35.2 | Congenital herpesviral [herpes simplex] infection           | 7712A |       |
| P35.3 | Congenital viral hepatitis                                  |       |       |
| P36.9 | Bacterial sepsis of newborn, unspecified                    | 7718A |       |
| P37.1 | Congenital toxoplasmosis                                    | 7712C | 13010 |
| P37.1 | Congenital toxoplasmosis                                    |       | 13020 |
| P37.2 | Neonatal (disseminated) listeriosis                         | 7712B | 02700 |
| P37.5 | Neonatal candidiasis                                        | 7717A |       |
| P37.9 | Congenital infectious and parasitic disease, unspecified    | 7712X |       |
| P38   | Omphalitis of newborn with or without mild haemorrhage      | 7714A |       |
| P39.0 | Neonatal infective mastitis                                 | 7715A | 77890 |
| P39.1 | Neonatal conjunctivitis and dacryocystitis                  | 7716A |       |
| P39.3 | Neonatal urinary tract infection                            | 7718B |       |
| P39.8 | Other specified infections specific to the perinatal period | 7718C |       |
| P39.9 | Infection specific to the perinatal period, unspecified     | 7718X |       |

The diagnosis codes are from the Finnish national editions of the International Classification of Diseases, 8th, 9th, and 10th Revisions (ICD-8, ICD-9, and ICD-10).<sup>2-4</sup>

ICD-10 disease names are from: World Health Organization. International Statistical Classification of Diseases and Related Health Problems 10th Revision [Internet]. ICD-10 Version:2016. [cited 2 Oct 2018]. Available from: <https://icd.who.int/browse10/2016/en>

**eTable 3. Demographic characteristics of participants at study entry by cohort**

| Demographic                                            | No. (%)              |                        |                   |                  |
|--------------------------------------------------------|----------------------|------------------------|-------------------|------------------|
|                                                        | Cohort               |                        |                   |                  |
|                                                        | FPS<br>(N = 240 048) | HeSSup<br>(N = 23 801) | STW<br>(N = 9276) |                  |
| Age at entry, years                                    |                      |                        |                   |                  |
|                                                        | 18-39                | 164 072 (68.3%)        | 13 801 (55.0%)    | 4620 (49.8%)     |
|                                                        | 40-49                | 48 930 (20.4%)         | 5883 (24.7%)      | 3037 (32.7%)     |
|                                                        | 50-59                | 25 155 (10.5%)         | 4837 (20.3%)      | 1566 (16.9%)     |
|                                                        | 60-87                | 1891 (0.8%)            | 0 (0.0%)          | 53 (0.6%)        |
| Sex                                                    |                      |                        |                   |                  |
|                                                        | Men                  | 63 804 (26.6%)         | 9793 (41.1%)      | 7168 (77.3%)     |
|                                                        | Women                | 176 244 (73.4%)        | 14 008 (58.9%)    | 2108 (22.7%)     |
| Socioeconomic status                                   |                      |                        |                   |                  |
|                                                        | Low                  | 28 130 (11.7%)         | 7236 (30.4%)      | 6437 (69.4%)     |
|                                                        | Intermediate         | 78 352 (32.6%)         | 12 663 (53.2%)    | 2176 (23.5%)     |
|                                                        | High                 | 133 566 (55.6%)        | 3902 (16.4%)      | 663 (7.1%)       |
| Hypertension                                           |                      |                        |                   |                  |
|                                                        | No                   | 232 650 (96.9%)        | 22 820 (95.9%)    | 8763 (94.5%)     |
|                                                        | Yes                  | 7398 (3.1%)            | 981 (4.1%)        | 513 (5.5%)       |
| Diabetes mellitus                                      |                      |                        |                   |                  |
|                                                        | No                   | 237 731 (99.0%)        | 23 561 (99.0%)    | 9190 (99.1%)     |
|                                                        | Yes                  | 2317 (1.0%)            | 240 (1.0%)        | 86 (0.9%)        |
| Ischaemic heart disease                                |                      |                        |                   |                  |
|                                                        | No                   | 239 094 (99.6%)        | 23 686 (99.5%)    | 9166 (98.8%)     |
|                                                        | Yes                  | 954 (0.4%)             | 115 (0.5%)        | 110 (1.2%)       |
| Cerebrovascular disease                                |                      |                        |                   |                  |
|                                                        | No                   | 239 456 (99.8%)        | 23 800 (100.0%)   | 9236 (99.6%)     |
|                                                        | Yes                  | 592 (0.2%)             | 1 (0.0%)          | 40 (0.4%)        |
| Parkinson's disease                                    |                      |                        |                   |                  |
|                                                        | No                   | 239 983 (100.0%)       | 23 784 (99.9%)    | 9276 (100.0%)    |
|                                                        | Yes                  | 65 (0.0%)              | 17 (0.1%)         | 0 (0.0%)         |
| Smoking status                                         |                      |                        |                   |                  |
|                                                        | Never smoker         | 57 971 (24.1%)         | 9827 (41.3%)      | 3214 (34.6%)     |
|                                                        | Ex-smoker            | 16 145 (6.7%)          | 7769 (32.6%)      | 2917 (31.4%)     |
|                                                        | Current smoker       | 16 189 (6.7%)          | 6107 (25.7%)      | 3023 (32.6%)     |
|                                                        | (not available)      | 149 743 (62.4%)        | 98 (0.4%)         | 122 (1.3%)       |
| Alcohol drinking                                       |                      |                        |                   |                  |
|                                                        | Non-drinker          | 13 492 (5.6%)          | 3794 (15.9%)      | 446 (4.8%)       |
|                                                        | Moderate             | 68 522 (28.5%)         | 17 587 (73.9%)    | 8247 (88.9%)     |
|                                                        | Intermediate         | 3456 (1.4%)            | 1115 (4.7%)       | 0 (0.0%)         |
|                                                        | Heavy                | 5270 (2.2%)            | 1270 (5.3%)       | 434 (4.7%)       |
|                                                        | (not available)      | 149 308 (62.2%)        | 35 (0.1%)         | 149 (1.6%)       |
| Follow-up, median<br>(range), years                    |                      | 20.0 (0.0-27.0)        | 15.0 (0.7-15.0)   | 30.8 (0.0-30.8)  |
| Dementia by the end of<br>follow-up                    |                      |                        |                   |                  |
|                                                        | No                   | 237 603 (99.0%)        | 23 732 (99.7%)    | 8726 (94.1%)     |
|                                                        | Yes                  | 2445 (1.0%)            | 69 (0.3%)         | 550 (5.9%)       |
| Age at dementia<br>diagnosis, median<br>(range), years |                      | 71.7 (22.7-92.2)       | 61.2 (34.3-67.3)  | 75.4 (45.5-93.2) |

Abbreviations: FPS, Finnish Public Sector study; HeSSup, Health and Social Support study; STW, Still Working study.

**eTable 4. Demographic characteristics of participants at study entry in the UK Biobank (replication cohort)**

| <b>Demographic</b>                               | <b>No. (%)</b>                      |
|--------------------------------------------------|-------------------------------------|
|                                                  | <b>UK Biobank<br/>(N = 502 273)</b> |
| Age at entry, years                              |                                     |
|                                                  | 18-39 4 (0.0%)                      |
|                                                  | 40-49 114 969 (23.4%)               |
|                                                  | 50-59 163 758 (33.3%)               |
|                                                  | 60-73 213 415 (43.4%)               |
| Sex                                              |                                     |
|                                                  | Men 267 940 (54.4%)                 |
|                                                  | Women 224 206 (45.6%)               |
| Socioeconomic status                             |                                     |
|                                                  | Low 85 203 (17.3%)                  |
|                                                  | Intermediate 245 836 (50.0%)        |
|                                                  | High 161 107 (32.7%)                |
| Hypertension                                     |                                     |
|                                                  | No 277 421 (56.4%)                  |
|                                                  | Yes 214 725 (43.6%)                 |
| Diabetes mellitus                                |                                     |
|                                                  | No 465 826 (94.7%)                  |
|                                                  | Yes 26 320 (5.3%)                   |
| Ischaemic heart disease                          |                                     |
|                                                  | No 472 309 (96.0%)                  |
|                                                  | Yes 19 837 (4.0%)                   |
| Cerebrovascular disease                          |                                     |
|                                                  | No 484 597 (98.5%)                  |
|                                                  | Yes 7549 (1.5%)                     |
| Parkinson's disease                              |                                     |
|                                                  | No 491 231 (99.8%)                  |
|                                                  | Yes 915 (0.2%)                      |
| Smoking status                                   |                                     |
|                                                  | Never smoker 268 570 (54.6%)        |
|                                                  | Ex-smoker 170 061 (34.6%)           |
|                                                  | Current smoker 51 710 (10.5%)       |
|                                                  | (not available) 1805 (0.4%)         |
| Alcohol drinking                                 |                                     |
|                                                  | Non-drinker 95 802 (19.5%)          |
|                                                  | Moderate 181 745 (36.9%)            |
|                                                  | Intermediate 113 736 (23.1%)        |
|                                                  | Heavy 100 399 (20.4%)               |
|                                                  | (not available) 464 (0.1%)          |
| Body mass index (kg/m <sup>2</sup> )             |                                     |
|                                                  | ≤24.9 162 233 (33.0%)               |
|                                                  | 25.0-29.9 207 962 (42.3%)           |
|                                                  | ≥30.0 119 366 (24.3%)               |
|                                                  | (not available) 2585 (0.5%)         |
| Follow-up, median (range), years                 | 9.0 (0.0-11.9)                      |
| Dementia by the end of follow-up                 |                                     |
|                                                  | No 489 771 (99.5%)                  |
|                                                  | Yes 2375 (0.5%)                     |
| Age at dementia diagnosis, median (range), years | 71.7 (43.8-79.6)                    |

**eTable 5. Distribution of Gram-negative bacterial infections**

| ICD-10 codes                           | Description                                                                               | Dementia by the end of follow-up |                         |                            |
|----------------------------------------|-------------------------------------------------------------------------------------------|----------------------------------|-------------------------|----------------------------|
|                                        |                                                                                           | Yes, n (%)<br>(n = 56)           | No, n (%)<br>(n = 3139) | Total, n (%)<br>(n = 3195) |
| A00-A03, A04.0-A04.6, A05.3            | Intestinal infectious diseases due to Gram-negative bacteria                              | 16 (28.6)                        | 880 (28.0)              | 896 (28.0)                 |
| A20, A21, A23-A25, A27, A28.0-A28.2    | Certain zoonotic bacterial diseases due to Gram-negative bacteria                         | 0 (0.0)                          | 97 (3.1)                | 97 (3.0)                   |
| A37                                    | Whooping cough                                                                            | 0 (0.0)                          | 50 (1.6)                | 50 (1.6)                   |
| A39                                    | Meningococcal infection                                                                   | 0 (0.0)                          | 76 (2.4)                | 76 (2.4)                   |
| A41.3, A41.5                           | Sepsis due to Gram-negative bacteria                                                      | 24 (42.9)                        | 889 (28.3)              | 913 (28.6)                 |
| A44                                    | Bartonellosis                                                                             | 0 (0.0)                          | 4 (0.1)                 | 4 (0.1)                    |
| A48.1                                  | Legionnaires disease                                                                      | 0 (0.0)                          | 3 (0.1)                 | 3 (0.1)                    |
| A49.2                                  | Haemophilus influenzae infection, unspecified site                                        | 0 (0.0)                          | 1 (0.0)                 | 1 (0.0)                    |
| A50-A58                                | Infections with a predominantly sexual mode of transmission due to Gram-negative bacteria | 6 (10.7)                         | 485 (15.5)              | 491 (15.4)                 |
| A69.2                                  | Lyme disease                                                                              | 1 (1.8)                          | 303 (9.7)               | 304 (9.5)                  |
| A65-A69 (excluding A69.2)              | Other spirochetal diseases                                                                | 2 (3.6)                          | 60 (1.9)                | 62 (1.9)                   |
| A70-A74                                | Other diseases caused by chlamydiae                                                       | 1 (1.8)                          | 82 (2.6)                | 83 (2.6)                   |
| A75-A79                                | Rickettsioses                                                                             | 0 (0.0)                          | 15 (0.5)                | 15 (0.5)                   |
| B96.1-B96.7                            | Gram-negative bacteria as the cause of diseases classified to other chapters              | 3 (5.4)                          | 45 (1.4)                | 48 (1.5)                   |
| G00.0                                  | Haemophilus meningitis                                                                    | 0 (0.0)                          | 33 (1.1)                | 33 (1.0)                   |
| J14, J15.0, J15.1, J15.5, J15.6, J16.0 | Pneumonias due to Gram-negative bacteria                                                  | 1 (1.8)                          | 66 (2.1)                | 67 (2.1)                   |
| J20.1                                  | Acute bronchitis due to Haemophilus influenzae                                            | 1 (1.8)                          | 10 (0.3)                | 11 (0.3)                   |
| M01.0                                  | Meningococcal arthritis                                                                   | 0 (0.0)                          | 12 (0.4)                | 12 (0.4)                   |
| M49.1, M49.2                           | Spondylopathies due to Gram-negative bacteria                                             | 0 (0.0)                          | 3 (0.1)                 | 3 (0.1)                    |
| M73.0                                  | Gonococcal bursitis                                                                       | 0 (0.0)                          | 1 (0.0)                 | 1 (0.0)                    |
| N74.2-74.4                             | Female pelvic inflammatory disorders due to Gram-negative bacteria                        | 1 (1.8)                          | 23 (0.7)                | 24 (0.8)                   |
| O98.1                                  | Syphilis complicating pregnancy, childbirth and the puerperium                            | 0 (0.0)                          | 1 (0.0)                 | 1 (0.0)                    |

### eMethods 3. Stata code for data analysis

\*\*\* PRIMARY ANALYSIS USING THREE COHORTS \*\*\*

version 16

\*FIGURE 1 and definition of variables

quietly: use "Pooled infections\_trimmattu", clear

```
tab anydementia // byte %8.0g any dementia diagnosis (yes/no)
sum anydementiapvm // int %9.0g date of first dementia diagnosis

tab anyanyinf // byte %8.0g yesno Hospitalisation for any infectious disease

tab anybactinf // byte %8.0g yesno Hospitalisation for any bacterial infection

tab anysystbact // byte %8.0g yesno Hospitalisation for any potentially invasive bacterial infections
tab anylocalbact // byte %8.0g yesno Hospitalisation for any localised bacterial infection

tab anygramplus // byte %8.0g yesno Hospitalisation for any Gram-positive bacterial infection

tab anygramminus // byte %8.0g yesno Hospitalisation for any Gram-negative bacterial infection
tab anyspirolepto // byte %8.0g yesno Hospitalisation for any spirochaetal or leptospiral bacterial infection
tab anymeningococ~s // byte %8.0g yesno Hospitalisation for meningococcal infection
tab anyothergramm~s // byte %8.0g yesno Hospitalisation for any other Gram-negative bacterial infection

tab anymycobact // byte %8.0g yesno Hospitalisation for any mycobacterial infection

tab anymycoplasma // byte %8.0g yesno Hospitalisation for any mycoplasma infection

tab anyextrac // byte %8.0g yesno Hospitalisation for any extracellular bacterial infection
tab anyintrac // byte %8.0g yesno Hospitalisation for any intracellular bacterial infection

tab anyviralinf // byte %8.0g yesno Hospitalisation for any viral infection

tab anyacuteviral // byte %8.0g yesno Hospitalisation for any acute viral infection
tab anyherpes // byte %8.0g yesno Hospitalisation for any herpesvirus infection
tab anypersviral // byte %8.0g yesno Hospitalisation for any potentially persistent viral infection (excluding herpesvirus
infections)

tab anyparasite // byte %8.0g yesno Hospitalisation for any parasitic infection

tab anymycose // byte %8.0g yesno Hospitalisation for any fungal infection (mycosis)
```

\*FIGURE 2.

capture log close

log using "FIGURE 2.log", replace

local dg anyinf bactinf systbact localbact extrac intrac gramplus gramminus othergramminus

local n\_dg: word count `dg'

local dg\_name ""Any infectious disease" "Any bacterial infection" "Systemic bacterial infection" "Local bacterial infection" "Any  
extracellular bacterial infection" "Any intracellular bacterial infection" "Gram-positive bacterial infection" "Gram-negative  
bacterial infection" "Gram-negative bacterial infections excluding those with known neurological sequelae"\*\*\*"

quietly: local irow = 7

```
forvalues i=1/`n_dg' {
```

```

quietly: local idg : word `i' of `dg'
quietly: local idg_name : word `i' of `dg_name'
display ""
display "`idg' followed by broad dementia, adjusted for sex and education and stratified by
cohort"

display ""
display "Pooled IPD-analysis, normal model and 10-year exclusion"
display ""
display "$S_TIME $S_DATE"
display ""

quietly: use "Pooled infections_trimmattu", clear
drop if ses==.
quietly: stset exitpvm, id(id) failure(ensidementia) origin(time syntpvm) enter(time entrypvm)

scale(365.25)

_d _origin _t _t0 ses

quietly: keep id any`idg' supu cohort exitpvm ensidementia syntpvm entrypvm ensi`idg'pvm _st

tab any`idg'
stsplit `idg'_split, at(0) after(time=ensi`idg'pvm)
tab `idg'_split
gen `idg'_timedep =0
replace `idg'_timedep = 1 if any`idg'==1 & `idg'_split==0
tab `idg'_timedep
tab any`idg' if `idg'_split!=-1

quietly: stdescribe
quietly: local failures = `r(N_fail)'
stcox `idg'_timedep 2.supu#cohort 2.ses#cohort 3.ses#cohort, strata(cohort)
quietly: matrix m = r(table)
tempname hr ll ul
scalar `hr' = m[1,1]
scalar `ll' = m[5,1]
scalar `ul' = m[6,1]
quietly: putexcel set "Pooled results.xlsx", sheet("FIGURE 2") modify
quietly: putexcel K`irow'=(`e(N_sub)'), nformat(number)
quietly: putexcel L`irow'=(`e(N_fail)'), nformat(number)
quietly: putexcel E`irow'=(`hr'), nformat(number_d2)
quietly: putexcel F`irow'=(`ll'), nformat(number_d2)
quietly: putexcel G`irow'=(`ul'), nformat(number_d2)
quietly: putexcel B`irow'=("`idg'")
quietly: putexcel C`irow'=("pooled")
quietly: putexcel D`irow'=("`idg_name'")
tab any`idg', matcell(x), if `idg'_split!=-1
matrix list x
quietly: tab any`idg' ensidementia, matcell(y), if `idg'_split!=-1
matrix list y
quietly: putexcel set "Pooled results.xlsx", sheet("FIGURE 2") modify
quietly: putexcel M`irow'=(x[2,1]), nformat(number)
quietly: putexcel N`irow'=(y[2,1]), nformat(number)

local ++irow

*Dementia occurring from year 10 onwards
gen ensi`idg'pvm10v = ensi`idg'pvm + round(10*365.25) if ensi`idg'pvm<entrypvm
replace ensi`idg'pvm10v = entrypvm if ensi`idg'pvm10v<entrypvm
replace _t0 = (ensi`idg'pvm10v-syntpvm)/365.25 if ensi`idg'pvm10v!=.
replace _t0 = _t0 + 10 if ensi`idg'pvm10v==.
drop if _t0>=_t
quietly: stdescribe

```



```

quietly: local failures = `r(N_fail)'
stcox `idg'_timedep 2.supu#cohort 2.ses#cohort 3.ses#cohort, strata(cohort)
quietly: matrix m = r(table)
scalar `hr' = m[1,1]
scalar `ll' = m[5,1]
scalar `ul' = m[6,1]
quietly: putexcel set "Pooled results.xlsm", sheet("FIGURE 2") modify
quietly: putexcel K`irow'=(`e(N_sub)'), nformat(number)
quietly: putexcel L`irow'=(`e(N_fail)'), nformat(number)
quietly: putexcel E`irow'=(`hr'), nformat(number_d2)
quietly: putexcel F`irow'=(`ll'), nformat(number_d2)
quietly: putexcel G`irow'=(`ul'), nformat(number_d2)
quietly: putexcel B`irow'=(" `idg'_10y_exclusion")
quietly: putexcel C`irow'=("pooled")
quietly: putexcel D`irow'=(" Dementia occurring more than 10 years after the
hospitalisation")

tab any`idg', matcell(x), if `idg'_split!=-1
matrix list x
quietly: tab any`idg' ensidementia, matcell(y), if `idg'_split!=-1
matrix list y
quietly: putexcel set "Pooled results.xlsm", sheet("FIGURE 2") modify
quietly: putexcel M`irow'=(x[2,1]), nformat(number)
quietly: putexcel N`irow'=(y[2,1]), nformat(number)

local ++irow
local ++irow
}

log close

*FIGURE 3.

capture log close
log using "FIGURE 3.log", replace
local dg viralinf herpes acuteviral persviral
local n_dg: word count `dg'
local dg_name ""Any viral infection" "Herpesvirus infection" "Other acute viral infection" "Other potentially persistent viral
infection""
quietly: local irow = 8
forvalues i=1/'n_dg' {
quietly: local idg : word `i' of `dg'
quietly: local idg_name : word `i' of `dg_name'
display ""
display "`idg' followed by broad dementia, adjusted for sex and education and stratified by
cohort"

display ""
display "Pooled IPD-analysis, normal model and 10-year exclusion"
display ""
display "$S_TIME $S_DATE"
display ""

quietly: use "Pooled infections_trimmattu", clear
drop if ses==.
quietly: stset exitpvm, id(id) failure(ensidementia) origin(time syntpvm) enter(time entrypvm)

scale(365.25)

quietly: keep id any`idg' supu cohort exitpvm ensidementia syntpvm entrypvm ensi`idg'pvm _st
_d _origin _t _t0 ses

tab any`idg'
stsplit `idg'_split, at(0) after(time=ensi`idg'pvm)

```

```

tab `idg'_split
gen `idg'_timedep =0
replace `idg'_timedep = 1 if any`idg'==1 & `idg'_split==0
tab `idg'_timedep
tab any`idg' if `idg'_split!=-1

quietly: stdescribe
quietly: local failures = `r(N_fail)'
stcox `idg'_timedep 2.supu#cohort 2.ses#cohort 3.ses#cohort, strata(cohort)
quietly: matrix m = r(table)
tempname hr ll ul
scalar `hr' = m[1,1]
scalar `ll' = m[5,1]
scalar `ul' = m[6,1]
quietly: putexcel set "Pooled results.xlsx", sheet("FIGURE 3") modify
    quietly: putexcel K`irow'=(`e(N_sub)'), nformat(number)
    quietly: putexcel L`irow'=(`e(N_fail)'), nformat(number)
    quietly: putexcel E`irow'=(`hr'), nformat(number_d2)
    quietly: putexcel F`irow'=(`ll'), nformat(number_d2)
    quietly: putexcel G`irow'=(`ul'), nformat(number_d2)
    quietly: putexcel B`irow'=("`idg'")
    quietly: putexcel C`irow'=("pooled")
    quietly: putexcel D`irow'=("`idg_name'")
tab any`idg', matcell(x), if `idg'_split!=-1
matrix list x
quietly: tab any`idg' ensidementia, matcell(y), if `idg'_split!=-1
matrix list y
quietly: putexcel set "Pooled results.xlsx", sheet("FIGURE 3") modify
    quietly: putexcel M`irow'=(x[2,1]), nformat(number)
    quietly: putexcel N`irow'=(y[2,1]), nformat(number)
local ++irow

*From year 10 onwards
gen ensi`idg'pvm10v = ensi`idg'pvm + round(10*365.25) if ensi`idg'pvm<entrypvm
replace ensi`idg'pvm10v = entrypvm if ensi`idg'pvm10v<entrypvm
replace _t0 = (ensi`idg'pvm10v-syntpvm)/365.25 if ensi`idg'pvm10v!=.
replace _t0 = _t0 + 10 if ensi`idg'pvm10v==.
drop if _t0>=_t
quietly: stdescribe
quietly: local failures = `r(N_fail)'
stcox `idg'_timedep 2.supu#cohort 2.ses#cohort 3.ses#cohort, strata(cohort)
quietly: matrix m = r(table)
scalar `hr' = m[1,1]
scalar `ll' = m[5,1]
scalar `ul' = m[6,1]
quietly: putexcel set "Pooled results.xlsx", sheet("FIGURE 3") modify
    quietly: putexcel K`irow'=(`e(N_sub)'), nformat(number)
    quietly: putexcel L`irow'=(`e(N_fail)'), nformat(number)
    quietly: putexcel E`irow'=(`hr'), nformat(number_d2)
    quietly: putexcel F`irow'=(`ll'), nformat(number_d2)
    quietly: putexcel G`irow'=(`ul'), nformat(number_d2)
    quietly: putexcel B`irow'=(" `idg'_10y_exclusion")
    quietly: putexcel C`irow'=("pooled")
    quietly: putexcel D`irow'=(" Dementia occurring more than 10 years after the
hospitalisation")

tab any`idg', matcell(x), if `idg'_split!=-1
matrix list x
quietly: tab any`idg' ensidementia, matcell(y), if `idg'_split!=-1

```

```

matrix list y
quietly: putexcel set "Pooled results.xlsx", sheet("FIGURE 3") modify
               quietly: putexcel M`irow'=(x[2,1]), nformat(number)
               quietly: putexcel N`irow'=(y[2,1]), nformat(number)

local ++irow
local ++irow
}

```

log close

\*Prepare the data for descriptive analysis

```

capture log close
log using "descriptive analysis.log", replace

```

```

quietly: use "Pooled infections_trimattu", clear
drop if ses==.

```

```

merge 1:1 id using "gramminus_koodit.dta"
drop _merge
recode gramminussepsis . = 0
recode gramminus_nonsepsis . = 0

```

```

rename ensidementia dementia
recode dementia . = 0
encode dementiatyyppi_laaja, gen(dementiatype)
rename exitpvm exitdate
rename syntpvm birthday
rename entrypvm entrydate
rename supu sex
drop gramminus
rename anygramminus gramminus
rename ensigramminuspvm gramminusdate
rename anyherpes herpes
rename ensiherpespvm herpesdate
rename tupakka smoking
rename hypert_combpvm hypertensiondate
rename diabetes_combpvm diabetesdate
rename ihd_combpvm ihddate
rename cereb_combpvm cerebdate
rename parkinson_combpvm parkinsondate
keep id cohort dementia dementiatype exitdate birthday entrydate sex gramminus* herpes herpesdate ses alcocl smoking
hypertensiondate diabetesdate ihddate cerebdate parkinsondate
count
save SipilaDESCRIBITIVE.dta, replace

```

\*Trim the data

```

use "SipilaDESCRIBITIVE.dta", clear
drop if exitdate <= entrydate
count
drop if ses == .
count

```

```

tab dementia
recode dementia . = 0
tab dementia

```

```

sum gramminus*
tab gramminus
replace gramminusdate=. if gramminusdate>=exitdate
replace gramminus = 0 if gramminusdate==.
sum gramminus*
tab gramminus

```

```

sum herpes*
tab herpes
replace herpesdate=. if herpesdate>=exitdate
replace herpes = 0 if herpesdate==.
sum herpes*
tab herpes

```

```
save "SipilaDESCRIPTIVE.dta", replace
```

```
**** Descriptive analysis ****
```

```
*Histogram for age at dementia onset
```

```
use "SipilaDESCRIPTIVE.dta", clear
```

```

preserve
stset exitdate, id(id) failure(dementia) origin(time birthday) enter(time entrydate) scale(365.25)
keep if _st==1 & ses!=.
gen dementia_age = int(_t)+0.5 if _d==1
histogram dementia_age, disc scheme(s1color) freq ///
    ysize(7.8) xsize(8.27) ///
    title(" ", size(medsmall) color(black)) ///
    graphregion(color(white)) ///
    xtitle("Age (years)", size(medsmall) color(black)) ///
    ytitle("Dementias, No.", size(medsmall) color(black))
graph export "eFigure4_TABLE2.emf", as(emf) replace
graph export "eFigure4_TABLE2.pdf", as(pdf) replace
restore

```

```
*Table 1
```

```
*Instal baselinetable package
```

```
capture net install st0524_1
```

```

preserve
stset exitdate, id(id) failure(dementia) origin(time birthday) enter(time entrydate) scale(365.25)
keep if _st==1 & ses!=.
count
count if dementia==1

```

```

capture label define sex 1"Men" 2"Women"
label values sex sex

```

```
gen followup = _t-_t0
```

```
gen age = (entrydate - birthday)/365.25
```

```

egen age_cat = cut(age), at(18,40,50,60,100)
tab age_cat

label define alcocl 0 "Non-drinker" 1 "Moderate" 2 "Intermediate" 3 "Heavy"
label values alcocl alcocl

foreach cm in hypertension diabetes ihd cereb parkinson {
    gen `cm'_entry= `cm'date<=entrydate
    tab `cm'_entry
}

gen age_at_dementia = _t if _d==1

baselinetable ///
age_cat(novarlabel afterhead("Age at entry, years")) ///
age(cts novarlabel afterhead("Age at entry (range), years")) ///
sex(novarlabel afterhead("Sex")) ///
ses(novarlabel afterhead("Education/Socioeconomic status")) ///
hypertension_entry(novarlabel afterhead("hypertensionn")) ///
diabetes_entry(novarlabel afterhead("Diabetes mellitus")) ///
ihd_entry(novarlabel afterhead("Ischaemic heart disease")) ///
cereb_entry(novarlabel afterhead("Cerebrovascular disease")) ///
parkinson_entry(novarlabel afterhead("Parkinson disease")) ///
smoking(varlabel afterhead("Smoking status")) ///
alcocl(novarlabel afterhead("Alcohol drinking")) ///
followup(cts novarlabel afterhead("Follow-up, median (range), years")) ///
dementia(novarlabel afterhead("Dementia")) ///
age_at_dementia(cts novarlabel afterhead("Age at dementia, median (range), years")) ///
, ctstvar(p50 (min-max)) missing ///
exportexcel(SipilaTABLE2table1, cell(A6) replace)

```

restore

```

forvalues cohort=1/3 {
    preserve
    keep if cohort == `cohort'
    stset exitdate, id(id) failure(dementia) origin(time birthday) enter(time entrydate) scale(365.25)
        keep if _st==1 & ses!=.
        count
        count if dementia==1

```

```

capture label define sex 1"Men" 2"Women"
label values sex sex

```

```

gen followup = _t- _t0

```

```

gen age = (entrydate - birthday)/365.25
egen age_cat = cut(age), at(18,40,50,60,100)
tab age_cat

```

```

label define alcocl 0 "Non-drinker" 1 "Moderate" 2 "Intermediate" 3 "Heavy"
label values alcocl alcocl

```

```

foreach cm in hypertension diabetes ihd cereb parkinson {
    gen `cm'_entry= `cm'date<=entrydate
    tab `cm'_entry
}

```

```

gen age_at_dementia = _t if _d==1

```

```

baselinetable ///
age_cat(novarlabel afterhead("Age at entry, years")) ///
age_cts novarlabel afterhead("Age at entry (range), years")) ///
sex(novarlabel afterhead("Sex")) ///
ses(novarlabel afterhead("Education/Socioeconomic status")) ///
hypertension_entry(novarlabel afterhead("hypertensionn")) ///
diabetes_entry(novarlabel afterhead("Diabetes mellitus")) ///
ihd_entry(novarlabel afterhead("Ischaemic heart disease")) ///
cereb_entry(novarlabel afterhead("Cerebrovascular disease")) ///
parkinson_entry(novarlabel afterhead("Parkinson disease")) ///
smoking(varlabel afterhead("Smoking status")) ///
alcohol(novarlabel afterhead("Alcohol drinking")) ///
followup(cts novarlabel afterhead("Follow-up, median (range), years")) ///
dementia(novarlabel afterhead("Dementia")) ///
age_at_dementia(cts novarlabel afterhead("Age at dementia, median (range), years")) ///
, ctsvarab(p50 (min-max)) missing ///
exportexcel(SipilaTABLE2table1_`cohort', cell(A6) replace)

```

```

restore
}

```

\*\*\* TABLE 2 \*\*\*

```
log using "TABLE2.log", replace
```

```

local dg gramminus herpes
local eks `"'no one" "below60" "hypertensio" "diabetes" "ihd" "cereb" "parkinson"'
local n_dg: word count `dg'
local n_eks: word count `eks'
local dg_name `"'Gram negative bacteria" "Herpesviruses"'
local eks_name `"'no one" "aged 60 or over" "hypertension" "diabetes" "ischaemic heart disease" "cerebrovascular disease"
"Parkinson's disease"'
quietly: local irow = 8
        forvalues i=1/`n_dg' {
            forvalues j=1/`n_eks' {
                quietly: local idg : word `i' of `dg'
                quietly: local idg_name : word `i' of `dg_name'
                quietly: local ieks : word `j' of `eks'
                quietly: local ieks_name : word `j' of `eks_name'
                display ""
                display "`idg' followed by broad dementia, adjusted for sex and education and stratified by
cohort"

                display ""
                display "Pooled IPD-analysis, normal model"
                display ""
                display "$S_TIME $S_DATE"
                display ""

                quietly: use "Pooled infections_trimmattu", clear
                quietly: drop if ses==.
                quietly: gen hypertensio_combpvm = hypert_combpvm

                if inlist("`ieks'", "hypertensio", "diabetes", "ihd", "cereb", "parkinson") {
                    tab `ieks'_comb
                    drop if `ieks'_comb==1
                    tab `ieks'_comb

```

```

}

stset exitpvm, id(id) failure(ensidementia) origin(time syntpvm) enter(time entrypvm)

scale(365.25)

if inlist("`ieks`","below60") {
  local ++irow
  drop if _t0>=60
}

if "`ieks`"=="hypertensio" & "`idg`"=="gramminus" {
  local irow = 25
}
if "`ieks`"=="hypertensio" & "`idg`"=="herpes" {
  local irow = 54
}
if inlist("`ieks`","hypertensio", "diabetes", "ihd", "cereb", "parkinson") {
  stset exitpvm, id(id) failure(ensidementia) origin(time syntpvm) enter(time entrypvm)
scale(365.25) exit(time `ieks'_combpvm)
}

quietly: capture keep id any`idg' supu cohort exitpvm ensidementia syntpvm entrypvm
ensi`idg'pvm _st _d _origin _t _t0 ses `ieks'_comb
tab any`idg'
quietly: stsplitt `idg'_split, at(0) after(time=ensi`idg'pvm)
quietly: tab `idg'_split
quietly: gen `idg'_timedep = 0
quietly: replace `idg'_timedep = 1 if any`idg'==1 & `idg'_split==0
tab `idg'_timedep
tab any`idg' if `idg'_split!=-1

quietly: stdescribe
quietly: local failures = `r(N_fail)'
stcox `idg'_timedep 2.supu#cohort 2.ses#cohort 3.ses#cohort, strata(cohort)
quietly: matrix m = r(table)
tempname hr ll ul
scalar `hr' = m[1,1]
scalar `ll' = m[5,1]
scalar `ul' = m[6,1]
quietly: putexcel set "Pooled results.xlsx", sheet("TABLE2") modify
quietly: putexcel K`irow'=(`e(N_sub)'), nformat(number)
quietly: putexcel L`irow'=(`e(N_fail)'), nformat(number)
quietly: putexcel E`irow'=(`hr'), nformat(number_d2)
quietly: putexcel F`irow'=(`ll'), nformat(number_d2)
quietly: putexcel G`irow'=(`ul'), nformat(number_d2)
quietly: putexcel B`irow'=("`idg'")
quietly: putexcel C`irow'=("pooled")
quietly: putexcel D`irow'=("Those with `ieks_name' excluded")
tab any`idg', matcell(x), if `idg'_split!=-1
matrix list x
quietly: tab any`idg' _d, matcell(y), if `idg'_split!=-1 & _d==1
matrix list y
quietly: putexcel set "Pooled results.xlsx", sheet("TABLE2") modify
quietly: putexcel M`irow'=(x[2,1]), nformat(number)
quietly: putexcel N`irow'=(y[2,1]), nformat(number)

local ++irow
}

```

```
quietly: local irow = 40
}
```

```
*Early- vs late-onset dementia (Gram-negative)
```

```
quietly: use "Pooled infections_trimmattu", clear
drop if ses==.
```

```
scale(365.25)
quietly: stset exitpvm, id(id) failure(ensidementia) origin(time syntpvm) enter(time entrypvm)
```

```
local idg gramminus
```

```
quietly: capture keep id any`idg' supu cohort exitpvm ensidementia syntpvm entrypvm
```

```
ensid`idg'pvm _st_d_origin_t_t0 ses
```

```
tab any`idg'
```

```
quietly: stsplit `idg'_split, at(0) after(time=ensid`idg'pvm)
```

```
quietly: tab `idg'_split
```

```
quietly: gen `idg'_timedep = 0
```

```
quietly: replace `idg'_timedep = 1 if any`idg'==1 & `idg'_split==0
```

```
tab `idg'_timedep
```

```
tab any`idg' if `idg'_split!=-1
```

```
stsplit age65, at(64.999)
```

```
recode age65 64.999=1
```

```
bySORT id age65 (gramminus_timedep): gen order = _n
```

```
bySORT id age65 (gramminus_timedep): egen maxn = max(order)
```

```
gen last = order==maxn
```

```
preserve
```

```
keep if age65==0
```

```
local irow 12
```

```
quietly: stdescribe
```

```
quietly: local failures = `r(N_fail)'
```

```
stcox `idg'_timedep 2.supu#cohort 2.ses#cohort 3.ses#cohort, strata(cohort)
```

```
quietly: matrix m = r(table)
```

```
tempname hr ll ul
```

```
scalar `hr' = m[1,1]
```

```
scalar `ll' = m[5,1]
```

```
scalar `ul' = m[6,1]
```

```
quietly: putexcel set "Pooled results.xlsm", sheet("TABLE2") modify
```

```
quietly: putexcel K`irow'=(`e(N_sub)'), nformat(number)
```

```
quietly: putexcel L`irow'=(`e(N_fail)'), nformat(number)
```

```
quietly: putexcel E`irow'=(`hr'), nformat(number_d2)
```

```
quietly: putexcel F`irow'=(`ll'), nformat(number_d2)
```

```
quietly: putexcel G`irow'=(`ul'), nformat(number_d2)
```

```
quietly: putexcel B`irow'=("`idg'")
```

```
quietly: putexcel C`irow'=("pooled")
```

```
quietly: putexcel D`irow'=("Early-onset dementia (onset before age 65)")
```

```
tab `idg'_timedep, matcell(x), if `idg'_split!=-1
```

```
matrix list x
```

```
quietly: tab `idg'_timedep ensidementia, matcell(y), if `idg'_split!=-1
```

```
matrix list y
```

```
quietly: putexcel set "Pooled results.xlsm", sheet("TABLE2") modify
```

```
quietly: putexcel M`irow'=(x[2,1]), nformat(number)
```

```
quietly: putexcel N`irow'=(y[2,1]), nformat(number)
```

```
restore
```

```
preserve
```



```

keep if age65==1
local irow 13
quietly: stdescribe
quietly: local failures = `r(N_fail)'
stcox `idg'_timedep 2.supu#cohort 2.ses#cohort 3.ses#cohort, strata(cohort)
quietly: matrix m = r(table)
tempname hr ll ul
scalar `hr' = m[1,1]
scalar `ll' = m[5,1]
scalar `ul' = m[6,1]
quietly: putexcel set "Pooled results.xlsm", sheet("TABLE2") modify
    quietly: putexcel K`irow'=(`e(N_sub)'), nformat(number)
    quietly: putexcel L`irow'=(`e(N_fail)'), nformat(number)
    quietly: putexcel E`irow'=(`hr'), nformat(number_d2)
    quietly: putexcel F`irow'=(`ll'), nformat(number_d2)
    quietly: putexcel G`irow'=(`ul'), nformat(number_d2)
    quietly: putexcel B`irow'=("`idg'")
    quietly: putexcel C`irow'=("pooled")
    quietly: putexcel D`irow'=("Late-onset dementia (onset at or after age 65)")
tab `idg'_timedep, matcell(x), if `idg'_split!=-1
matrix list x
quietly: tab `idg'_timedep ensidementia, matcell(y), if `idg'_split!=-1
matrix list y
quietly: putexcel set "Pooled results.xlsm", sheet("TABLE2") modify
    quietly: putexcel M`irow'=(x[2,1]), nformat(number)
    quietly: putexcel N`irow'=(y[2,1]), nformat(number)

restore

```

\*Type of dementia

```

quietly: use "Pooled infections_trimmattu", clear
tab dementiatyyppi_laaja anygramminus if ensidementia==1, col chi
    local irow 15
    local j 1
    foreach type in AD FTD PD VD other unspecified {
        preserve
        encode dementiatyyppi_laaja, gen(dementiatyyppi_laaja_nro)

        display ""
        display "`type'"
        display ""
        local idg gramminus
        drop if ses==.

        stset exitpvm, id(id) failure(dementiatyyppi_laaja_nro==`j') origin(time syntpvm) enter(time
entrypvm) scale(365.25)

        local idg gramminus
        quietly: capture keep id any`idg' supu cohort exitpvm ensidementia syntpvm entrypvm
        ensi`idg'pvm _st_d_origin_t_t0 ses
        tab any`idg'
        quietly: stsplint `idg'_split, at(0) after(time=ensi`idg'pvm)
        quietly: tab `idg'_split
        quietly: gen `idg'_timedep =0
        quietly: replace `idg'_timedep = 1 if any`idg'==1 & `idg'_split==0
        tab `idg'_timedep
        tab any`idg' if `idg'_split!=-1

```

```

quietly: stdescribe
quietly: local failures = `r(N_fail)`
stcox `idg'_timedep 2.supu#cohort 2.ses#cohort 3.ses#cohort, strata(cohort)
quietly: matrix m = r(table)
tempname hr ll ul
scalar `hr' = m[1,1]
scalar `ll' = m[5,1]
scalar `ul' = m[6,1]
quietly: putexcel set "Pooled results.xlsx", sheet("TABLE2") modify
quietly: putexcel K`irow'=(`e(N_sub)'), nformat(number)
quietly: putexcel L`irow'=(`e(N_fail)'), nformat(number)
quietly: putexcel E`irow'=(`hr'), nformat(number_d2)
quietly: putexcel F`irow'=(`ll'), nformat(number_d2)
quietly: putexcel G`irow'=(`ul'), nformat(number_d2)
quietly: putexcel B`irow'=("`idg'")
quietly: putexcel C`irow'=("pooled")
quietly: putexcel D`irow'=("`type'")
tab `idg'_timedep, matcell(x), if `idg'_split!=-1
matrix list x
quietly: tab `idg'_timedep _d, matcell(y), if `idg'_split!=-1 & _d==1
matrix list y
quietly: putexcel set "Pooled results.xlsx", sheet("TABLE2") modify
quietly: putexcel M`irow'=(x[2,1]), nformat(number)
quietly: putexcel N`irow'=(y[2,1]), nformat(number)

local ++irow
local ++j
restore
}

```

\*Early- vs late-onset dementia (herpesviruses)

```

quietly: use "Pooled infections_trimattu", clear
drop if ses==.

```

scale(365.25)

```

quietly: stset exitpvm, id(id) failure(ensidementia) origin(time syntpvm) enter(time entrypvm)

```

```

local idg herpes
quietly: capture keep id any`idg' supu cohort exitpvm ensidementia syntpvm entrypvm
ensi`idg'pvm _st _d _origin _t _t0 ses

```

```

tab any`idg'
quietly: stsplit `idg'_split, at(0) after(time=ensi`idg'pvm)
quietly: tab `idg'_split
quietly: gen `idg'_timedep =0
quietly: replace `idg'_timedep = 1 if any`idg'==1 & `idg'_split==0
tab `idg'_timedep
tab any`idg' if `idg'_split!=-1

```

```

stsplit age65, at(64.999)
recode age65 64.999=1

```

```

preserve
keep if age65==0
local irow 44
quietly: stdescribe
quietly: local failures = `r(N_fail)`
stcox `idg'_timedep 2.supu#cohort 2.ses#cohort 3.ses#cohort, strata(cohort)
quietly: matrix m = r(table)
tempname hr ll ul

```

```

scalar `hr' = m[1,1]
scalar `ll' = m[5,1]
scalar `ul' = m[6,1]
quietly: putexcel set "Pooled results.xlsm", sheet("TABLE2") modify
    quietly: putexcel K`irow'=(`e(N_sub)'), nformat(number)
    quietly: putexcel L`irow'=(`e(N_fail)'), nformat(number)
    quietly: putexcel E`irow'=(`hr'), nformat(number_d2)
    quietly: putexcel F`irow'=(`ll'), nformat(number_d2)
    quietly: putexcel G`irow'=(`ul'), nformat(number_d2)
    quietly: putexcel B`irow'=("`idg'")
    quietly: putexcel C`irow'=("pooled")
    quietly: putexcel D`irow'=("Early-onset dementia (onset before age 65)")
tab `idg'_timedep, matcell(x), if `idg'_split!=-1
matrix list x
quietly: tab `idg'_timedep ensidementia, matcell(y), if `idg'_split!=-1
matrix list y
quietly: putexcel set "Pooled results.xlsm", sheet("TABLE2") modify
    quietly: putexcel M`irow'=(x[2,1]), nformat(number)
    quietly: putexcel N`irow'=(y[2,1]), nformat(number)

restore

preserve
keep if age65==1
local irow 45
quietly: stdescribe
quietly: local failures = `r(N_fail)'
stcox `idg'_timedep 2.supu#cohort 2.ses#cohort 3.ses#cohort, strata(cohort)
quietly: matrix m = r(table)
tempname hr ll ul
scalar `hr' = m[1,1]
scalar `ll' = m[5,1]
scalar `ul' = m[6,1]
quietly: putexcel set "Pooled results.xlsm", sheet("TABLE2") modify
    quietly: putexcel K`irow'=(`e(N_sub)'), nformat(number)
    quietly: putexcel L`irow'=(`e(N_fail)'), nformat(number)
    quietly: putexcel E`irow'=(`hr'), nformat(number_d2)
    quietly: putexcel F`irow'=(`ll'), nformat(number_d2)
    quietly: putexcel G`irow'=(`ul'), nformat(number_d2)
    quietly: putexcel B`irow'=("`idg'")
    quietly: putexcel C`irow'=("pooled")
    quietly: putexcel D`irow'=("Late-onset dementia (onset at or after age 65)")
tab `idg'_timedep, matcell(x), if `idg'_split!=-1
matrix list x
quietly: tab `idg'_timedep ensidementia, matcell(y), if `idg'_split!=-1
matrix list y
quietly: putexcel set "Pooled results.xlsm", sheet("TABLE2") modify
    quietly: putexcel M`irow'=(x[2,1]), nformat(number)
    quietly: putexcel N`irow'=(y[2,1]), nformat(number)

restore

```

\*Type of dementia

```

quietly: use "Pooled infections_trimmattu", clear
tab dementiatyyppi_laaja anyherpes if ensidementia==1, col chi
    local irow 47
    local j 1
    foreach type in AD FTD PD VD other unspecified {

```

```

preserve
encode dementiatyyppi_laaja, gen(dementiatyyppi_laaja_nro)

display ""
display ""`type""
display ""
drop if ses==.

stset exitpvm, id(id) failure(dementiatyyppi_laaja_nro==`j') origin(time syntpvm) enter(time
entrypvm) scale(365.25)

local idg herpes
quietly: capture keep id any`idg' supu cohort exitpvm ensidementia syntpvm entrypvm
ensi`idg'pvm _st_d_origin_t_t0 ses
tab any`idg'
quietly: stsplit `idg'_split, at(0) after(time=ensi`idg'pvm)
quietly: tab `idg'_split
quietly: gen `idg'_timedep =0
quietly: replace `idg'_timedep = 1 if any`idg'==1 & `idg'_split==0
tab `idg'_timedep
tab any`idg' if `idg'_split!=-1

quietly: stdescribe
quietly: local failures = `r(N_fail)'
stcox `idg'_timedep 2.supu#cohort 2.ses#cohort 3.ses#cohort, strata(cohort)
quietly: matrix m = r(table)
tempname hr ll ul
scalar `hr' = m[1,1]
scalar `ll' = m[5,1]
scalar `ul' = m[6,1]
quietly: putexcel set "Pooled results.xlsx", sheet("TABLE2") modify
quietly: putexcel K`irow'=(`e(N_sub)'), nformat(number)
quietly: putexcel L`irow'=(`e(N_fail)'), nformat(number)
quietly: putexcel E`irow'=(`hr'), nformat(number_d2)
quietly: putexcel F`irow'=(`ll'), nformat(number_d2)
quietly: putexcel G`irow'=(`ul'), nformat(number_d2)
quietly: putexcel B`irow'=("`idg'")
quietly: putexcel C`irow'=("pooled")
quietly: putexcel D`irow'=("`type'")
tab `idg'_timedep, matcell(x), if `idg'_split!=-1
matrix list x
quietly: tab `idg'_timedep _d, matcell(y), if `idg'_split!=-1 & _d==1
matrix list y
quietly: putexcel set "Pooled results.xlsx", sheet("TABLE2") modify
quietly: putexcel M`irow'=(x[2,1]), nformat(number)
quietly: putexcel N`irow'=(y[2,1]), nformat(number)

local ++irow
local ++j
restore
}

```

#### \*Adjustments

```

local dg gramminus herpes
local eks alcocl tupakka
local n_dg: word count `dg'
local n_eks: word count `eks'
local dg_name ""Gram negative bacteria" "Herpesviruses""

```

```

local eks_name `"'heavy drinking" "smoking"'
quietly: local irow = 31
    forvalues i=1/\`n_dg' {
        forvalues j=1/\`n_eks' {
            quietly: local idg : word `i' of `dg'
            quietly: local idg_name : word `i' of `dg_name'
            quietly: local ieks : word `j' of `eks'
            quietly: local ieks_name : word `j' of `eks_name'
            display ""
            display ""`idg' followed by broad dementia, adjusted for sex and education and `eks_name' and
stratified by cohort""
            display ""
            display "Pooled IPD-analysis, normal model"
            display ""
            display "$S_TIME $S_DATE"
            display ""

            quietly: use "Pooled infections_trimmattu", clear
            drop if ses==.

            if "`iekss'"=="alcocl" {
                replace entrypvm = alkopvm if cohort==1 & alkopvm>=entrypvm // 1 = FPS, FPS:ssä kyselytieto
on kerätty kohorttiin tuloa myöhemmin.
                tab `ieks'
                drop if `ieks' ==.
            }
            if "`iekss'"=="tupakka" {
                replace entrypvm = tupakkapvm if cohort==1 & tupakkapvm>=entrypvm // 1 = FPS, FPS:ssä
kyselytieto on kerätty kohorttiin tuloa myöhemmin.
                tab `ieks'
                drop if `ieks' ==.
            }

            quietly: stset exitpvm, id(id) failure(ensidementia) origin(time syntpvm) enter(time entrypvm)
scale(365.25)

            quietly: capture keep id any`idg' supu cohort exitpvm ensidementia syntpvm entrypvm
ensid`idg'pvm _st_d_origin_t_t0 ses `ieks'_comb
            tab any`idg'
            stsplit `idg'_split, at(0) after(time=ensid`idg'pvm)
            tab `idg'_split
            gen `idg'_timedep =0
            replace `idg'_timedep = 1 if any`idg'==1 & `idg'_split==0
            tab `idg'_timedep
            tab any`idg' if `idg'_split!=-1

            *Those with data on the covariate available but without adjustment
            quietly: stdescribe
            quietly: local failures = `r(N_fail)'
            stcox `idg'_timedep 2.supu#cohort 2.ses#cohort 3.ses#cohort, strata(cohort)
            quietly: matrix m = r(table)
            tempname hr ll ul
            scalar `hr' = m[1,1]
            scalar `ll' = m[5,1]
            scalar `ul' = m[6,1]
            quietly: putexcel set "Pooled results.xlsm", sheet("TABLE2") modify
                quietly: putexcel K`irow'=(`e(N_sub)'), nformat(number)
                quietly: putexcel L`irow'=(`e(N_fail)'), nformat(number)
                quietly: putexcel E`irow'=(`hr'), nformat(number_d2)

```

```

quietly: putexcel F`irow'=(`ll'), nformat(number_d2)
quietly: putexcel G`irow'=(`ul'), nformat(number_d2)
quietly: putexcel B`irow'=("`idg'")
quietly: putexcel C`irow'=("pooled")
quietly: putexcel D`irow'=("Data available for `ieks_name'")
tab any`idg', matcell(x), if `idg'_split!=-1
matrix list x
quietly: tab any`idg' ensidementia, matcell(y), if `idg'_split!=-1
matrix list y
quietly: putexcel set "Pooled results.xlsm", sheet("TABLE2") modify
quietly: putexcel M`irow'=(x[2,1]), nformat(number)
quietly: putexcel N`irow'=(y[2,1]), nformat(number)

local ++irow

*Those with data on the covariate available and adjusted
quietly: stdescribe
quietly: local failures = `r(N_fail)'
if ""ieks"" == "alcocl" {
stcox `idg'_timedep 2.supu#cohort 2.ses#cohort 3.ses#cohort 1.`ieks'#cohort 2.`ieks'#cohort
3.`ieks'#cohort, strata(cohort)
}
else if ""ieks"" == "tupakka" {
stcox `idg'_timedep 2.supu#cohort 2.ses#cohort 3.ses#cohort 2.`ieks'#cohort 3.`ieks'#cohort,
strata(cohort)
}
else if ""ieks"" == "bmi_who" {
stcox `idg'_timedep 2.supu#cohort 2.ses#cohort 3.ses#cohort 25.`ieks'#cohort 30.`ieks'#cohort,
strata(cohort)
}
else if ""ieks"" == "bmi" {
stcox `idg'_timedep 2.supu#cohort 2.ses#cohort 3.ses#cohort c.`ieks'#cohort c.`ieks'2#cohort,
strata(cohort)
}
quietly: matrix m = r(table)
tempname hr ll ul
scalar `hr' = m[1,1]
scalar `ll' = m[5,1]
scalar `ul' = m[6,1]
quietly: putexcel set "Pooled results.xlsm", sheet("TABLE2") modify
quietly: putexcel K`irow'=(`e(N_sub)'), nformat(number)
quietly: putexcel L`irow'=(`e(N_fail)'), nformat(number)
quietly: putexcel E`irow'=(`hr'), nformat(number_d2)
quietly: putexcel F`irow'=(`ll'), nformat(number_d2)
quietly: putexcel G`irow'=(`ul'), nformat(number_d2)
quietly: putexcel B`irow'=("`idg'")
quietly: putexcel C`irow'=("pooled")
quietly: putexcel D`irow'=("Additionally adjusted for `ieks_name'")
tab any`idg', matcell(x), if `idg'_split!=-1
matrix list x
quietly: tab any`idg' ensidementia, matcell(y), if `idg'_split!=-1
matrix list y
quietly: putexcel set "Pooled results.xlsm", sheet("TABLE2") modify
quietly: putexcel M`irow'=(x[2,1]), nformat(number)
quietly: putexcel N`irow'=(y[2,1]), nformat(number)

local ++irow
local ++irow
}
quietly: local irow = 59

```

```

}

*Potential period effect

local dg gramminus herpes
local n_dg: word count `dg'
local dg_name ""Any Gram-negative bacterial infection*" "Herpesvirus infection""
local irow 37

forvalues i=1/\`n_dg' {
    quietly: local idg : word `i' of `dg'
    quietly: local idg_name : word `i' of `dg_name'
    display ""
    display ""idg' followed by broad dementia, adjusted for sex and education and stratified by
cohort"

    display ""
    display "Pooled IPD-analysis, potential period effect"
    display ""
    display "$S_TIME $S_DATE"
    display ""

    quietly: use "Pooled infections_trimmattu", clear
    drop if ses==.

    quietly: stset exitpvm, id(id) failure(failure ==1) origin(time syntpvm) enter(time entrypvm)
scale(365.25)

    quietly: keep id any`idg' supu cohort exitpvm ensidementia failure syntpvm entrypvm
ensi`idg'pvm _st_d_origin_t_t0 ses syntvuosi
    tab any`idg'
    stsplit `idg'_split, at(0) after(time=ensi`idg'pvm)
    tab `idg'_split
    gen `idg'_timedep =0
    replace `idg'_timedep = 1 if any`idg'==1 & `idg'_split==0
    tab `idg'_timedep
    tab any`idg' if `idg'_split!=-1

    quietly: stdescribe
    quietly: local failures = `r(N_fail)'
    stcox `idg'_timedep 2.supu#cohort 2.ses#cohort 3.ses#cohort c.syntvuosi#cohort, strata(cohort)

    quietly: matrix m = r(table)
    tempname hr ll ul
    scalar `hr' = m[1,1]
    scalar `ll' = m[5,1]
    scalar `ul' = m[6,1]
    quietly: putexcel set "Pooled results.xlsx", sheet("TABLE2") modify
        quietly: putexcel K`irow'=(`e(N_sub)'), nformat(number)
        quietly: putexcel L`irow'=(`e(N_fail)'), nformat(number)
        quietly: putexcel E`irow'=(`hr'), nformat(number_d2)
        quietly: putexcel F`irow'=(`ll'), nformat(number_d2)
        quietly: putexcel G`irow'=(`ul'), nformat(number_d2)
        quietly: putexcel B`irow'=("`idg'")
        quietly: putexcel C`irow'=("pooled")
        quietly: putexcel D`irow'=("Adjusted for period effect")
    tab any`idg', matcell(x), if `idg'_split!=-1
    matrix list x
    quietly: tab any`idg' ensidementia, matcell(y), if `idg'_split!=-1
    matrix list y

```

```

quietly: putexcel set "Pooled results.xlsm", sheet("TABLE2") modify
quietly: putexcel M`irow'=(x[2,1]), nformat(number)
quietly: putexcel N`irow'=(y[2,1]), nformat(number)
local irow 65
}

```

\*\* Proportionality of hazards (eMethods 2 and eFigure 2)

capture log close

log using "Proportional hazards assumptions.log", replace

```

local dg anyinf bactinf sysbact localbact extrac intrac gramplus gramminus othergramminus viralinf herpes acuteviral persviral
local n_dg: word count `dg'
local dg_name ""Any infectious disease" "Any bacterial infection" "Systemic bacterial infection" "Local bacterial infection" "Any
extracellular bacterial infection" "Any intracellular bacterial infection" "Gram-positive bacterial infection" "Gram-negative
bacterial infection" "Gram-negative bacterial infection excluding meningococci, sprichetes and leptospira" "Any viral infection"
"Herpesvirus infection" "Other acute viral infection" "Other potentially persistent viral infection""
quietly: local irow = 7
forvalues i=1/'n_dg' {
quietly: local idg : word `i' of `dg'
quietly: local idg_name : word `i' of `dg_name'
display ""
display "`idg' followed by broad dementia, adjusted for sex and education and stratified by
cohort"
display ""
display "Pooled IPD-analysis, normal model"
display ""
display "$S_TIME $S_DATE"
display ""
quietly: use "Pooled infections_trimmattu", clear
drop if ses==.
quietly: stset exitpvm, id(id) failure(ensidementia) origin(time syntpvm) enter(time entrypvm)
scale(365.25)
quietly: keep id any`idg' supu cohort exitpvm ensidementia syntpvm entrypvm ensi`idg'pvm _st
_d _origin _t _t0 ses
tab any`idg'
stsplit `idg'_split, at(0) after(time=ensi`idg'pvm)
tab `idg'_split
gen `idg'_timedep =0
replace `idg'_timedep = 1 if any`idg'==1 & `idg'_split==0
tab `idg'_timedep
tab any`idg' if `idg'_split!=-1
quietly: stdescribe
quietly: local failures = `r(N_fail)'
stcox `idg'_timedep 2.supu#cohort 2.ses#cohort 3.ses#cohort, strata(cohort)
matrix r = r(table)
estat phtest, detail
matrix m = r(phtest)
quietly: putexcel set "Pooled results.xlsm", sheet("IPD, PH-assumptions") modify
quietly: putexcel A`irow'="`idg'", nformat(number)
quietly: putexcel B`irow'="`idg_name'", nformat(number)
quietly: putexcel C`irow'=`r(p)', nformat(number)
quietly: putexcel D`irow'=matrix(m[1,4]), nformat(number_d2)
quietly: putexcel E`irow'=matrix(m[2,4]), nformat(number_d2)
quietly: putexcel F`irow'=matrix(m[3,4]), nformat(number_d2)

```



```

quietly: putexcel G`irow'=matrix(m[4,4]), nformat(number_d2)
quietly: putexcel H`irow'=matrix(m[5,4]), nformat(number_d2)
quietly: putexcel I`irow'=matrix(m[6,4]), nformat(number_d2)
quietly: putexcel J`irow'=matrix(m[7,4]), nformat(number_d2)
quietly: putexcel K`irow'=matrix(m[8,4]), nformat(number_d2)
quietly: putexcel L`irow'=matrix(m[9,4]), nformat(number_d2)
quietly: putexcel M`irow'=matrix(m[10,4]), nformat(number_d2)
quietly: putexcel N`irow'=matrix(r[1,1]), nformat(number_d2)

local ++irow
}
quietly: local irow = 6

quietly: putexcel set "Pooled results.xlsm", sheet("IPD, PH-assumptions") modify
quietly: putexcel E`irow'="Sex_FPS", nformat(number_d2)
quietly: putexcel F`irow'="Sex_HeSSup", nformat(number_d2)
quietly: putexcel G`irow'="Sex_STW", nformat(number_d2)
quietly: putexcel E`irow'="2.edu_FPS", nformat(number_d2)
quietly: putexcel F`irow'="2.edu_HeSSup", nformat(number_d2)
quietly: putexcel G`irow'="2.edu_STW", nformat(number_d2)
quietly: putexcel E`irow'="3.edu_FPS", nformat(number_d2)
quietly: putexcel F`irow'="3.edu_HeSSup", nformat(number_d2)
quietly: putexcel G`irow'="3.edu_STW", nformat(number_d2)

log close

```

\*\*\*\*\*Scaled Schoenfeld residuals\*\*\*\*\*

```

capture log close
log using "Scaled Schoenfeld residuals.log", replace

```

\*Scaled schoenfeld residuals -kuvat:

\*Reference: Royston and Lambert: Flexible Parametric Survival Analysis Using Stata: Beyond the Cox Model.  
Chapter 7.3 What do we mean by a TD effect?

```

local dg anyinf sysbact intrac gramminus othergramminus viralinf herpes persviral
local n_dg: word count `dg'
local dg_name `"'Any infectious disease" "Systemic bacterial infections" "Intracellular bacterial infections"
"Gram-negative bacterial infections" "Gram-negative bacterial infections excluding meningococci, sprichetes and leptospira"
"Any viral infection" "Herpesvirus infections" "Other potentially persistent viral infections"'"
forvalues i=1/'n_dg' {
    quietly: local idg : word `i' of `dg'
    quietly: local idg_name : word `i' of `dg_name'

    quietly: use "Pooled infections_trimmattu", clear
    drop if ses==.

    local j = 1
    foreach cohort in FPS HeSSup STW {
        gen `cohort'supu=0
        replace `cohort'supu=1 if supu==2 & cohort==`j'
        gen `cohort'ses2=0
        replace `cohort'ses2=1 if ses==2 & cohort==`j'
        gen `cohort'ses3=0
        replace `cohort'ses3=1 if ses==3 & cohort==`j'
        local ++j
    }
}

```

```

tabulate cohort, gen(dummycohort)

quietly: stset exitpvm, id(id) failure(ensidementia) origin(time syntpvm) enter(time entrypvm)
scale(365.25)
quietly: keep id any`idg' *supu* cohort exitpvm ensidementia syntpvm
entrypvm ensi`idg'pvm _st_d_origin_t_t0 *ses*
tab any`idg'
stsplit `idg'_split, at(0) after(time=ensi`idg'pvm)
tab `idg'_split
gen `idg'_timedep =0
replace `idg'_timedep = 1 if any`idg'==1 & `idg'_split==0
tab `idg'_timedep
tab any`idg' if `idg'_split!=-1

stcox `idg'_timedep FPSsupu HeSSupsupu STWsupu FPSses2 HeSSupses2 STWses2 FPSses3
HeSSupses3 STWses3, strata(cohort)
capture drop *sca*
predict sca*, scaledsch
running sca1 _t if _d==1, gen(smooth_sca) gense(smooth_sca_se) nodraw
gen smooth_esca = exp(smooth_sca)
gen smooth_esca_lci = exp(smooth_sca - 1.96*smooth_sca_se)
gen smooth_esca_uci = exp(smooth_sca + 1.96*smooth_sca_se)
local betaround: di %7.2f exp(_b[`idg'_timedep])
tokenize "`betaround'"
di "`1'"
twoway (rarea smooth_esca_lci smooth_esca_uci _t, pstyle(ci) sort yaxis(1 2)) ///
(line smooth_esca _t, sort clpattern(solid)) ///
(function y = 1, lpattern(shortdash) range(_t)) ///
(function y = `1', lpattern(longdash) range(_t)), ///
legend(order(2 "Exponentiated scaled Schoenfeld residuals" 1 "95% confidence
interval" 4 "Overall hazard ratio ") holes(2) size(small)) ///
title("`idg_name" "and dementia", size(medsmall)) ///
ytile("Exponentiated scaled Schoenfeld residuals", size(small)) ///
xtile("Age (years)", size(small)) ///
yscale(log range(0.1 100)) ///
scheme(sj) ///
ylabel(0.1 1 10 100, labsize(medsmall) angle(0)) ///
ylabel("`1'", angle(0) axis(2))
graph save sca_`idg'.gph, replace
graph export sca_`idg'.pdf, as(pdf) replace
}

```

\*Combine figures:

```

* Create an empty figure to be used when combining an odd number of figures
scatter cohort supu if _n==1, ysize(3.9) xsize(4.135) scheme(s1color) plotregion(style(none)) yscale(off noline)
xscale(off noline) mcolor(%0) graphregion(color(white))
graph save "sca_.gph", replace

```

```

local dg anyinf sysbact intrac gramminus othergramminus viralinf herpes persviral
local n_dg: word count `dg'
local i=1
while `i' <= 8 {
    forvalues j=1/3 {
        local k = `i'+`j'-1
        quietly: local dg`j' : word `k' of `dg'
    }
}

```

```

    }
    graph combine sca_`dg1'.gph sca_`dg2'.gph sca_`dg3'.gph, col(1) altshrink scheme(s1color)
graphregion(color(white)) plotregion(color(gs15)) ysize(8.27) xsize(5.83) // ysize ja xsize according to A5 (in inches)
    graph export "IPD_sca_`i'.emf", as(emf) replace
    local i = `i'+3
    }

```

capture log close

\*Post-hoc analysis

\*Sepsis vs other Gram-negative

log using "IPD posthoc.log", replace

```

quietly: use "Pooled infections_trimmattu", clear
drop if ses==.

```

```

merge 1:1 id using "gramminuskoodit.dta"
drop _merge
recode gramminussepsis . = 0
recode gramminus_nonsepsis . = 0
tab gramminussepsis
tab gramminus_nonsepsis

```

```

quietly: stset exitpvm, id(id) failure(ensidementia) origin(time syntpvm) enter(time entrypvm)

```

scale(365.25)

```

local idg gramminus
quietly: capture keep id any`idg' supu cohort exitpvm ensidementia syntpvm entrypvm
ensi`idg'pvm _st_d_origin_t_t0 ses gramminussepsis gramminus_nonsepsis
tab any`idg'
quietly: stsplit `idg'_split, at(0) after(time=ensi`idg'pvm)
quietly: tab `idg'_split
quietly: gen gramminussepsis_timedep = 0
quietly: replace gramminussepsis_timedep = 1 if gramminussepsis==1 & `idg'_split==0
tab gramminussepsis_timedep

```

```

local irow 22
quietly: stdescribe
quietly: local failures = `r(N_fail)'
stcox `idg'sepsis_timedep 2.supu#cohort 2.ses#cohort 3.ses#cohort, strata(cohort)
quietly: matrix m = r(table)
tempname hr ll ul
scalar `hr' = m[1,1]
scalar `ll' = m[5,1]
scalar `ul' = m[6,1]
quietly: putexcel set "Pooled results.xlsm", sheet("TABLE_posthoc") modify
    quietly: putexcel K`irow'=(`e(N_sub)'), nformat(number)
    quietly: putexcel L`irow'=(`e(N_fail)'), nformat(number)
    quietly: putexcel E`irow'=(`hr'), nformat(number_d2)
    quietly: putexcel F`irow'=(`ll'), nformat(number_d2)
    quietly: putexcel G`irow'=(`ul'), nformat(number_d2)
    quietly: putexcel B`irow'=("`idg'")
    quietly: putexcel C`irow'=("pooled")
    quietly: putexcel D`irow'=("Those with sepsis")
tab `idg'sepsis_timedep, matcell(x), if `idg'_split!=1
matrix list x

```

```

quietly: tab `idg'sepsis_timedep ensidementia, matcell(y), if `idg'_split!=-1
matrix list y
quietly: putexcel set "Pooled results.xlsx", sheet("TABLE_posthoc") modify
               quietly: putexcel M`irow'=(x[2,1]), nformat(number)
               quietly: putexcel N`irow'=(y[2,1]), nformat(number)

quietly: use "Pooled infections_trimmattu", clear
drop if ses==.

merge 1:1 id using "gramminus_koodit.dta"
drop _merge
recode gramminussepsis . =0
recode gramminus_nonsepsis . =0
tab gramminussepsis
tab gramminus_nonsepsis

quietly: stset exitpvm, id(id) failure(ensidementia) origin(time syntpvm) enter(time entrypvm)

scale(365.25)

local idg gramminus
quietly: capture keep id any`idg' supu cohort exitpvm ensidementia syntpvm entrypvm
ensi`idg'pvm _st_d_origin_t_t0 ses gramminussepsis gramminus_nonsepsis
tab any`idg'
quietly: stsplitsplit `idg'_split, at(0) after(time=ensi`idg'pvm)
quietly: tab `idg'_split
quietly: gen gramminus_nonsepsis_timedep =0
quietly: replace gramminus_nonsepsis_timedep = 1 if gramminus_nonsepsis==1 & `idg'_split==0
tab gramminus_nonsepsis_timedep

local irow 23
quietly: stdescribe
quietly: local failures = `r(N_fail)'
stcox `idg'_nonsepsis_timedep 2.supu#cohort 2.ses#cohort 3.ses#cohort, strata(cohort)
quietly: matrix m = r(table)
tempname hr ll ul
scalar `hr' = m[1,1]
scalar `ll' = m[5,1]
scalar `ul' = m[6,1]
quietly: putexcel set "Pooled results.xlsx", sheet("TABLE_posthoc") modify
               quietly: putexcel K`irow'=(`e(N_sub)'), nformat(number)
               quietly: putexcel L`irow'=(`e(N_fail)'), nformat(number)
               quietly: putexcel E`irow'=(`hr'), nformat(number_d2)
               quietly: putexcel F`irow'=(`ll'), nformat(number_d2)
               quietly: putexcel G`irow'=(`ul'), nformat(number_d2)
               quietly: putexcel B`irow'=("`idg'")
               quietly: putexcel C`irow'=("pooled")
               quietly: putexcel D`irow'=("Those without sepsis")
tab `idg'_nonsepsis_timedep, matcell(x), if `idg'_split!=-1
matrix list x
quietly: tab `idg'_nonsepsis_timedep ensidementia, matcell(y), if `idg'_split!=-1
matrix list y
quietly: putexcel set "Pooled results.xlsx", sheet("TABLE_posthoc") modify
               quietly: putexcel M`irow'=(x[2,1]), nformat(number)
               quietly: putexcel N`irow'=(y[2,1]), nformat(number)

capture log close

```

\*\*\* REPLICATION ANALYSIS USING UK BIOBANK\*\*\*

capture version 16

\*\*\*\*\* STEP 1: RENAME VARIABLES \*\*\*\*\*

/\*Generate a wide dataset (one row per participant) with the following variables:

| variable name:      | variable type             | description                                                                                                                                                                                                                                                                                                                                                                         |
|---------------------|---------------------------|-------------------------------------------------------------------------------------------------------------------------------------------------------------------------------------------------------------------------------------------------------------------------------------------------------------------------------------------------------------------------------------|
| id                  | integer                   | participant id                                                                                                                                                                                                                                                                                                                                                                      |
| dementia            | binary (1/0)              | Dementia during follow-up.                                                                                                                                                                                                                                                                                                                                                          |
| dementiatype        | categorical (1,2,3,4,5,6) | Type of first dementia diagnosis: 1) Alzheimer's disease (F00, G30, 29010, 3310A), 2) Frontotemporal dementia (G31.0,F02.0,29011,34791,3311A), 3) Parkinson's disease dementia (F02.3), 4) Vascular dementia (F01,4378A), 5) Other dementia (G31.8, F02.1, F02.2, F02.4, F02.8), 6) Unspecified dementia (F03, G31.1, F05.1, F02.39, 29000, 29019, 290, 2900A, 2941A, 34792, 3312X) |
| exitdate            | date                      | First of the following: date of first dementia diagnosis, date of death, end of follow-up (dementia diagnosis that occurs before study entry should be included if such data are available)                                                                                                                                                                                         |
| birthday            | date                      | Date of Birth                                                                                                                                                                                                                                                                                                                                                                       |
| entrydate           | date                      | Date of study entry                                                                                                                                                                                                                                                                                                                                                                 |
| sex                 | binary (1/2)              | Sex                                                                                                                                                                                                                                                                                                                                                                                 |
| gramminus           | binary (1/0)              | Whether or not the participant was hospitalised for a gramnegative infection before the end of follow-up (hospitalisations that occur before study entry should be included if such data are available).                                                                                                                                                                            |
| gramminus_sepsis    | binary (1/0)              | ==1 if the Gram-negative infection is sepsis (A41.3, A41.5, 0384A, 0384B, 03880)                                                                                                                                                                                                                                                                                                    |
| gramminus_nonsepsis | binary (1/0)              | ==1 if the Gram-negative infection is not sepsis                                                                                                                                                                                                                                                                                                                                    |
| gramminusdate       | date                      | Date of first hospitalisation for a gramnegative infection                                                                                                                                                                                                                                                                                                                          |
| herpes              | binary (1/0)              | Whether or not the participant was hospitalised for a herpesvirus infection before the end of follow-up (hospitalisations that occur before study entry should be included if such data are available)                                                                                                                                                                              |
| herpesdate          | date                      | Date of first hospitalisation for a herpesvirus infection                                                                                                                                                                                                                                                                                                                           |
| ses                 | categorical (1,2,3)       | Socioeconomic status or education (low, intermediate, high)                                                                                                                                                                                                                                                                                                                         |
| alcocl              | categorical (0,1,2,3)     | non-drinkers, moderate drinkers, intermediate drinkers, heavy drinkers                                                                                                                                                                                                                                                                                                              |
| smoking             | categorical (1,2,3)       | never smokers, ex-smokers, current smokers                                                                                                                                                                                                                                                                                                                                          |
| bmi_who             | categorical (0,25,30)     | normal ( $\leq 24.9$ kg/m <sup>2</sup> ), overweight (25.0-29.9 kg/m <sup>2</sup> ), obese ( $\geq 30.0$ kg/m <sup>2</sup> ).                                                                                                                                                                                                                                                       |
| hypertensiondate    | date                      | date of first hypertension diagnosis                                                                                                                                                                                                                                                                                                                                                |
| diabetesdate        | date                      | date of first diabetes diagnosis                                                                                                                                                                                                                                                                                                                                                    |
| ihddate             | date                      | date of first ischaemic heart disease diagnosis                                                                                                                                                                                                                                                                                                                                     |
| cerebdate           | date                      | date of first cerebrovascular disease diagnosis                                                                                                                                                                                                                                                                                                                                     |

```
parkinsondate          date
                        date of first Parkinson's disease diagnosis
```

```
*/
```

```
***** STEP 2: RUN THE CODE BELOW AND COLLECT THE OUTPUT FILES (log-file, Excel-files and figures from the working
directory) *****
```

```
capture log close
log using "Sipila et al UKB.log", replace
```

```
*Trim the data
use "SipilaUKB.dta", clear
drop if exitdate<=entrydate
count
drop if ses==.
count
```

```
tab dementia
recode dementia .=0
tab dementia
```

```
sum gramminus*
tab gramminus
replace gramminusdate=. if gramminusdate>=exitdate
replace gramminus = 0 if gramminusdate==.
sum gramminus*
tab gramminus
```

```
sum herpes*
tab herpes
replace herpesdate=. if herpesdate>=exitdate
replace herpes = 0 if herpesdate==.
sum herpes*
tab herpes
```

```
save "SipilaUKB.dta", replace
```

```
**** Descriptive analysis ****
```

```
*Histogram for age at dementia onset
```

```
use "SipilaUKB.dta", clear
```

```
preserve
stset exitdate, id(id) failure(dementia) origin(time birthday) enter(time entrydate) scale(365.25)
keep if _st==1 & ses!=.
gen dementia_age = int(_t)+0.5 if _d==1
histogram dementia_age, disc scheme(s1color) freq ///
```

```

ysize(7.8) xsize(8.27) ///
title(" ", size(medsmall) color(black)) ///
graphregion(color(white)) ///
xtitle("Age (years)", size(medsmall) color(black)) ///
ytile("Dementias, No.", size(medsmall) color(black))
graph export "eFigure4_UKB.emf", as(emf) replace
graph export "eFigure4_UKB.pdf", as(pdf) replace
restore

```

\*Table 1

```

*Instal baselinetable package
capture net install st0524_1

```

```

preserve
stset exitdate, id(id) failure(dementia) origin(time birthday) enter(time entrydate) scale(365.25)
keep if _st==1 & ses!=.
count
count if dementia==1

```

```

capture label define sex 1"Men" 2"Women"
label values sex sex

```

```

gen followup = _t-_t0

```

```

gen age = (entrydate - birthday)/365.25
egen age_cat = cut(age), at(18,40,50,60,100)
tab age_cat

```

```

label define alcocl 0 "Non-drinker" 1 "Moderate" 2 "Intermediate" 3 "Heavy"
label values alcocl alcocl

```

```

foreach cm in hypertension diabetes ihd cereb parkinson {
    gen `cm'_entry= `cm'date<=entrydate
    tab `cm'_entry
}

```

```

gen age_at_dementia = _t if _d==1

```

```

baselinetable ///
age_cat(novarlabel afterhead("Age at entry, years")) ///
age(cts novarlabel afterhead("Age at entry (range), years")) ///
sex(novarlabel afterhead("Sex")) ///
ses(novarlabel afterhead("Education/Socioeconomic status")) ///
hypertension_entry(novarlabel afterhead("hypertensionn")) ///
diabetes_entry(novarlabel afterhead("Diabetes mellitus")) ///
ihd_entry(novarlabel afterhead("Ischaemic heart disease")) ///
cereb_entry(novarlabel afterhead("Cerebrovascular disease")) ///
parkinson_entry(novarlabel afterhead("Parkinson disease")) ///
smoking(varlabel afterhead("Smoking status")) ///
alcocl(novarlabel afterhead("Alcohol drinking")) ///
bmi_who(novarlabel afterhead("Body mass index")) ///
followup(cts novarlabel afterhead("Follow-up, median (range), years")) ///
dementia(novarlabel afterhead("Dementia")) ///
age_at_dementia(cts novarlabel afterhead("Age at dementia, median (range), years")) ///
, ctstvar(p50 (min-max)) missing ///
exportexcel(SipilaUKBtable1, cell(A6) replace)

```

restore

\*\*\*\*\* Cox models \*\*\*\*\*

\*Basic model and 10-year exclusion

local dg gramminus herpes

local n\_dg: word count `dg'

local dg\_name `""Gram-negative bacterial infection" "Herpesvirus infection""'

quietly: local irow = 8

forvalues i=1/`n\_dg' {

quietly: local idg : word `i' of `dg'

quietly: local idg\_name : word `i' of `dg\_name'

display ""

display "\$S\_TIME \$S\_DATE"

display ""

preserve

drop if ses==.

stset exitdate, id(id) failure(dementia) origin(time birthday) enter(time entrydate) scale(365.25)

keep if \_st==1 & ses!=.

quietly: keep id `idg' sex exitdate dementia birthday entrydate `idg'date \_st\_d\_origin\_t\_t0

ses

tab `idg'

stsplit `idg'\_split, at(0) after(time=`idg'date)

tab `idg'\_split

gen `idg'\_timedep =0

replace `idg'\_timedep = 1 if `idg'==1 & `idg'\_split==0

tab `idg'\_timedep

tab `idg' if `idg'\_split!=-1

stdescribe

quietly: local failures = `r(N\_fail)'

stcox `idg'\_timedep i.sex i.ses

quietly: matrix m = r(table)

estat phtest, detail

tempname hr ll ul

scalar `hr' = m[1,1]

scalar `ll' = m[5,1]

scalar `ul' = m[6,1]

quietly: putexcel set "SipilaUKBresults.xlsx", sheet("FIGURE") modify

quietly: putexcel K`irow'=(`e(N\_sub)'), nformat(number)

quietly: putexcel L`irow'=(`e(N\_fail)'), nformat(number)

quietly: putexcel E`irow'=(`hr'), nformat(number\_d2)

quietly: putexcel F`irow'=(`ll'), nformat(number\_d2)

quietly: putexcel G`irow'=(`ul'), nformat(number\_d2)

quietly: putexcel B`irow'=("`idg'")

quietly: putexcel D`irow'=("`idg\_name'")

tab `idg', matcell(x), if `idg'\_split!=-1

matrix list x

tab `idg' dementia, matcell(y), if `idg'\_split!=-1 & dementia==1

matrix list y

quietly: putexcel set "SipilaUKBresults.xlsx", sheet("FIGURE") modify

quietly: putexcel M`irow'=(x[2,1]), nformat(number)

quietly: putexcel N`irow'=(y[2,1]), nformat(number)

local ++irow

\*Remove first ten years

gen `idg'date10y = `idg'date + round(10\*365.25) if `idg'date<entrydate



```

replace `idg'date10y = entrydate if `idg'date10y<entrydate
replace _t0 = (`idg'date10y-birthday)/365.25 if `idg'date10y!=.
replace _t0 = _t0 + 10 if `idg'date10y==.
drop if _t0>=_t
stdescribe
quietly: local failures = `r(N_fail)'
stcox `idg'_timedep i.sex i.ses
quietly: matrix m = r(table)
estat phtest, detail
scalar `hr' = m[1,1]
scalar `ll' = m[5,1]
scalar `ul' = m[6,1]
quietly: putexcel set "SipilaUKBResults.xlsx", sheet("FIGURE") modify
quietly: putexcel K`irow'=(`e(N_sub)'), nformat(number)
quietly: putexcel L`irow'=(`e(N_fail)'), nformat(number)
quietly: putexcel E`irow'=(`hr'), nformat(number_d2)
quietly: putexcel F`irow'=(`ll'), nformat(number_d2)
quietly: putexcel G`irow'=(`ul'), nformat(number_d2)
quietly: putexcel B`irow'=(" `idg'_10y_exclusion")

quietly: putexcel D`irow'=(" Dementia occurring more than 10 years after the
hospitalisation")

tab `idg', matcell(x), if `idg'_split!=-1
matrix list x
tab `idg' dementia, matcell(y), if `idg'_split!=-1 & dementia==1
matrix list y
quietly: putexcel set "SipilaUKBResults.xlsx", sheet("FIGURE") modify
quietly: putexcel M`irow'=(x[2,1]), nformat(number)
quietly: putexcel N`irow'=(y[2,1]), nformat(number)

restore
local irow 51
}

```

#### \*Exclusions

```

local dg gramminus herpes
local eks `"'below60" "hypertension" "diabetes" "ihd" "cereb" "parkinson"'
local n_dg: word count `dg'
local n_eks: word count `eks'
local dg_name `"'Gram negative bacteria" "Herpesviruses"'
local eks_name `"'aged 60 or over" "hypertension" "diabetes" "ischaemic heart disease" "cerebrovascular disease" "Parkinson's disease"'
quietly: local irow = 8
forvalues i=1/`n_dg' {
forvalues j=1/`n_eks' {
quietly: local idg : word `i' of `dg'
quietly: local idg_name : word `i' of `dg_name'
quietly: local ieks : word `j' of `eks'
quietly: local ieks_name : word `j' of `eks_name'
display ""
display "$S_TIME $S_DATE"
display ""

preserve
quietly: drop if ses==.

if inlist("`ieks'", "hypertension", "diabetes", "ihd", "cereb", "parkinson") {
gen `ieks' = `ieks'date<=entrydate
tab `ieks'

```

```

drop if `ieks'==1
tab `ieks'
}

stset exitdate, id(id) failure(dementia) origin(time birthday) enter(time entrydate) scale(365.25)
keep if _st==1 & ses!=.

if "`ieks'"=="below60" & "`idg'"=="gramminus" {
local irow 11
drop if _t0>=60
}
if "`ieks'"=="below60" & "`idg'"=="herpes" {
local irow 54
}

if "`ieks'"=="hypertension" & "`idg'"=="gramminus" {
local irow = 26
}
if "`ieks'"=="hypertension" & "`idg'"=="herpes" {
local irow = 66
}
if inlist("`ieks'", "hypertension", "diabetes", "ihd", "cereb", "parkinson") {
stset exitdate, id(id) failure(dementia) origin(time birthday) enter(time entrydate) scale(365.25)

exit(time `ieks'date)

keep if _st==1 & ses!=.
local ++irow
}

quietly: capture keep id `idg' sex exitdate dementia birthday entrydate `idg'date _st _d _origin
_t _t0 ses `ieks'date

tab `idg'
stsplit `idg'_split, at(0) after(time=`idg'date)
tab `idg'_split
gen `idg'_timedep =0
replace `idg'_timedep = 1 if `idg'==1 & `idg'_split==0
tab `idg'_timedep
tab `idg' if `idg'_split!=-1

stdescribe
quietly: local failures = `r(N_fail)'
stcox `idg'_timedep i.sex i.ses
quietly: matrix m = r(table)
tempname hr ll ul
scalar `hr' = m[1,1]
scalar `ll' = m[5,1]
scalar `ul' = m[6,1]
quietly: putexcel set "SipilaUKBresults.xlsx", sheet("FIGURE") modify
quietly: putexcel K`irow'=(`e(N_sub)'), nformat(number)
quietly: putexcel L`irow'=(`e(N_fail)'), nformat(number)
quietly: putexcel E`irow'=(`hr'), nformat(number_d2)
quietly: putexcel F`irow'=(`ll'), nformat(number_d2)
quietly: putexcel G`irow'=(`ul'), nformat(number_d2)
quietly: putexcel B`irow'=("`idg'")
quietly: putexcel D`irow'=("Those with `ieks_name' excluded")
tab `idg', matcell(x), if `idg'_split!=-1
matrix list x
tab `idg'_d, matcell(y), if `idg'_split!=-1 & _d==1
matrix list y

```

```

quietly: putexcel set "SipilaUKBresults.xlsx", sheet("FIGURE") modify
               quietly: putexcel M`irow'=(x[2,1]), nformat(number)
               quietly: putexcel N`irow'=(y[2,1]), nformat(number)
restore
}
}

*Early- vs late-onset dementia
foreach idg in gramminus herpes {
    foreach onset in early late {
display "`idg'" "`onset'"

preserve
drop if ses==.

stset exitdate, id(id) failure(dementia) origin(time birthday) enter(time entrydate) scale(365.25)
keep if _st==1 & ses!=.

quietly: capture keep id `idg' sex exitdate dementia birthday entrydate `idg'date _st _d _origin
_t _t0 ses

tab `idg'
stsplit `idg'_split, at(0) after(time=`idg'date)
tab `idg'_split
gen `idg'_timedep =0
replace `idg'_timedep = 1 if `idg'==1 & `idg'_split==0
tab `idg'_timedep
tab `idg' if `idg'_split!=1

stsplit age65, at(64.999)
recode age65 64.999=1

bysort id age65 (`idg'_timedep): gen order = _n
bysort id age65 (`idg'_timedep): egen maxn = max(order)
gen last = order==maxn

if "`onset'"=="early" {
keep if age65==0
    if "`idg'"=="gramminus" {
        local irow 13
    }
    else {
        local irow 56
    }

stdescribe
quietly: local failures = `r(N_fail)'  

stcox `idg'_timedep i.sex i.ses
quietly: matrix m = r(table)
tempname hr ll ul
scalar `hr' = m[1,1]
scalar `ll' = m[5,1]
scalar `ul' = m[6,1]
quietly: putexcel set "SipilaUKBresults.xlsx", sheet("FIGURE") modify
               quietly: putexcel K`irow'=(`e(N_sub)'), nformat(number)
               quietly: putexcel L`irow'=(`e(N_fail)'), nformat(number)
               quietly: putexcel E`irow'=(`hr'), nformat(number_d2)
               quietly: putexcel F`irow'=(`ll'), nformat(number_d2)

```

```

quietly: putexcel G`irow'=(`ul'), nformat(number_d2)
quietly: putexcel B`irow'=("`idg'")

quietly: putexcel D`irow'=("Early-onset dementia (onset before age 65)")
tab `idg'_timedep, matcell(x), if `idg'_split!=-1
matrix list x
tab `idg'_timedep dementia, matcell(y), if `idg'_split!=-1 & dementia==1
matrix list y
quietly: putexcel set "SipilaUKBresults.xlsx", sheet("FIGURE") modify
quietly: putexcel M`irow'=(x[2,1]), nformat(number)
quietly: putexcel N`irow'=(y[2,1]), nformat(number)
}

else {
keep if age65==1
if "`idg'"=="gramminus" {
local irow 14
}
else {
local irow 57
}

stdescribe
quietly: local failures = `r(N_fail)'
stcox `idg'_timedep i.sex i.ses
quietly: matrix m = r(table)
tempname hr ll ul
scalar `hr' = m[1,1]
scalar `ll' = m[5,1]
scalar `ul' = m[6,1]
quietly: putexcel set "SipilaUKBresults.xlsx", sheet("FIGURE") modify
quietly: putexcel K`irow'=(`e(N_sub)'), nformat(number)
quietly: putexcel L`irow'=(`e(N_fail)'), nformat(number)
quietly: putexcel E`irow'=(`hr'), nformat(number_d2)
quietly: putexcel F`irow'=(`ll'), nformat(number_d2)
quietly: putexcel G`irow'=(`ul'), nformat(number_d2)
quietly: putexcel B`irow'=("`idg'")

quietly: putexcel D`irow'=("Late-onset dementia (onset at age 65 or later)")
tab `idg'_timedep, matcell(x), if `idg'_split!=-1
matrix list x
tab `idg'_timedep dementia, matcell(y), if `idg'_split!=-1 & dementia==1
matrix list y
quietly: putexcel set "SipilaUKBresults.xlsx", sheet("FIGURE") modify
quietly: putexcel M`irow'=(x[2,1]), nformat(number)
quietly: putexcel N`irow'=(y[2,1]), nformat(number)
}
restore
}
}

```

\*Type of dementia

```

local dg gramminus herpes
local n_dg: word count `dg'
local dg_name `"" Gram-negative bacterial infection*" "Herpesvirus infection""'
forvalues i=1/'n_dg' {
quietly: local idg : word `i' of `dg'
quietly: local idg_name : word `i' of `dg_name'

```

```

display ""
display "$S_TIME $S_DATE"
display ""

if "`idg'"=="gramminus" {
local irow 16
}
else {
local irow 59
}

forvalues type = 1/6 {
preserve
capture stset exitdate, id(id) failure(dementiatype==`type') origin(time birthday)
enter(time entrydate) scale(365.25)

_st _t _t0 ses

capture keep id `idg' sex exitdate dementia birthday entrydate `idg'date _st _d

capture tab `idg'
capture stsplit `idg'_split, at(0) after(time=`idg'date)
capture tab `idg'_split
capture gen `idg'_timedep =0
capture replace `idg'_timedep = 1 if `idg'==1 & `idg'_split==0
capture tab `idg'_timedep
capture tab `idg' if `idg'_split!=-1
capture stdescribe
capture quietly: local failures = `r(N_fail)'
capture gen birthyear = year(birthday)
capture stcox `idg'_timedep i.sex i.ses birthyear
capture quietly: matrix m = r(table)
capture tempname hr ll ul
capture scalar `hr' = m[1,1]
capture scalar `ll' = m[5,1]
capture scalar `ul' = m[6,1]
quietly: capture putexcel set "SipilaUKBresults.xlsx", sheet("FIGURE") modify
quietly: capture putexcel K`irow'=(`e(N_sub)'), nformat(number)
quietly: capture putexcel L`irow'=(`e(N_fail)'), nformat(number)
quietly: capture putexcel E`irow'=(`hr'), nformat(number_d2)
quietly: capture putexcel F`irow'=(`ll'), nformat(number_d2)
quietly: capture putexcel G`irow'=(`ul'), nformat(number_d2)
quietly: capture putexcel B`irow'=("`idg'")
quietly: capture putexcel D`irow'=("Dementiatype `type'")
capture tab `idg', matcell(x), if `idg'_split!=-1
capture matrix list x
capture tab `idg' dementia, matcell(y), if `idg'_split!=-1 & _d==1
capture matrix list y
capture quietly: putexcel set "SipilaUKBresults.xlsx", sheet("FIGURE") modify
capture quietly: putexcel M`irow'=(x[2,1]), nformat(number)
capture quietly: putexcel N`irow'=(y[2,1]), nformat(number)
restore
local ++irow
}
}

```

\*Potential period effect

local dg gramminus herpes

```
local n_dg: word count `dg'
```

```
local dg_name `"' Gram-negative bacterial infection*" "Herpesvirus infection"'"
```

```
forvalues i=1/`n_dg' {  
    quietly: local idg : word `i' of `dg'  
    quietly: local idg_name : word `i' of `dg_name'  
    display ""  
    display "$S_TIME $S_DATE"  
    display ""  
  
    preserve  
    drop if ses==.  
    if "`idg'"=="gramminus" {  
        local irow 34  
    }  
    else {  
        local irow 73  
    }  
    stset exitdate, id(id) failure(dementia) origin(time birthday) enter(time entrydate) scale(365.25)  
    keep if _st==1 & ses!=.
```

```
    quietly: keep id `idg' sex exitdate dementia birthday entrydate `idg'date _st_d_origin_t_t0
```

ses

```
    tab `idg'  
    stsplit `idg'_split, at(0) after(time=`idg'date)  
    tab `idg'_split  
    gen `idg'_timedep =0  
    replace `idg'_timedep = 1 if `idg'==1 & `idg'_split==0  
    tab `idg'_timedep  
    tab `idg' if `idg'_split!=-1  
  
    quietly: stdescribe  
    quietly: local failures = `r(N_fail)'  
    gen birthyear = year(birthday)  
    stcox `idg'_timedep i.sex i.ses birthyear  
    quietly: matrix m = r(table)
```

```
    tempname hr ll ul  
    scalar `hr' = m[1,1]  
    scalar `ll' = m[5,1]  
    scalar `ul' = m[6,1]  
    quietly: putexcel set "SipilaUKBresults.xlsx", sheet("FIGURE") modify  
        quietly: putexcel K`irow'=(`e(N_sub)'), nformat(number)  
        quietly: putexcel L`irow'=(`e(N_fail)'), nformat(number)  
        quietly: putexcel E`irow'=(`hr'), nformat(number_d2)  
        quietly: putexcel F`irow'=(`ll'), nformat(number_d2)  
        quietly: putexcel G`irow'=(`ul'), nformat(number_d2)  
        quietly: putexcel B`irow'=("`idg'")  
        quietly: putexcel D`irow'=("Adjusted for period effect")  
    tab `idg', matcell(x), if `idg'_split!=-1  
    matrix list x  
    tab `idg' dementia, matcell(y), if `idg'_split!=-1 & dementia==1  
    matrix list y  
    quietly: putexcel set "SipilaUKBresults.xlsx", sheet("FIGURE") modify  
        quietly: putexcel M`irow'=(x[2,1]), nformat(number)  
        quietly: putexcel N`irow'=(y[2,1]), nformat(number)
```

```
    local ++irow
```

```
restore
```

```
}
```

```
*Potential confounders
```

```
local dg gramminus herpes
```

```
local eks alcocl smoking bmi_who all
```

```
local n_dg: word count `dg'
```

```
local n_eks: word count `eks'
```

```
local dg_name `"'Gram negative bacteria" "Herpesviruses"'`
```

```
local eks_name `"'heavy drinking" "smoking" "body mass index" "all three"'`
```

```
quietly: local irow = 36
```

```
forvalues i=1/\`n_dg' {
```

```
forvalues j=1/\`n_eks' {
```

```
quietly: local idg : word `i' of `dg'
```

```
quietly: local idg_name : word `i' of `dg_name'
```

```
quietly: local ieks : word `j' of `eks'
```

```
quietly: local ieks_name : word `j' of `eks_name'
```

```
display ""
```

```
display "$S_TIME $S_DATE"
```

```
display ""
```

```
preserve
```

```
drop if ses==.
```

```
if "`ieksts'" == "all" {
```

```
drop if alcocl==. | smoking==. | bmi_who==.
```

```
count
```

```
}
```

```
else {
```

```
tab `ieksts'
```

```
drop if `ieksts' ==.
```

```
}
```

```
stset exitdate, id(id) failure(dementia) origin(time birthday) enter(time entrydate) scale(365.25)
```

```
keep if _st==1 & ses!=.
```

```
quietly: capture keep id `idg' sex exitdate dementia birthday entrydate `idg'date _st_d_origin
```

```
_t_t0 ses `ieksts'date
```

```
tab `idg'
```

```
stsplit `idg'_split, at(0) after(time=`idg'date)
```

```
tab `idg'_split
```

```
gen `idg'_timedep = 0
```

```
replace `idg'_timedep = 1 if `idg'==1 & `idg'_split==0
```

```
tab `idg'_timedep
```

```
tab `idg' if `idg'_split!=-1
```

```
*Those with data on the covariate available but without adjustment
```

```
stdescribe
```

```
quietly: local failures = `r(N_fail)'
```

```
stcox `idg'_timedep i.sex i.ses
```

```
quietly: matrix m = r(table)
```

```
tempname hr ll ul
```

```
scalar `hr' = m[1,1]
```

```
scalar `ll' = m[5,1]
```

```
scalar `ul' = m[6,1]
```

```
quietly: putexcel set "SipilaUKBresults.xlsx", sheet("FIGURE") modify
```

```
quietly: putexcel K`irow'=(`e(N_sub)'), nformat(number)
```

```
quietly: putexcel L`irow'=(`e(N_fail)'), nformat(number)
```

```
quietly: putexcel E`irow'=(`hr'), nformat(number_d2)
```

```
quietly: putexcel F`irow'=(`ll'), nformat(number_d2)
```

```

        quietly: putexcel G`irow'=(`ul'), nformat(number_d2)
        quietly: putexcel B`irow'=("`idg'")
        quietly: putexcel D`irow'=("Data available for `ieks_name'")
    tab `idg', matcell(x), if `idg'_split!=-1
    matrix list x
    tab `idg' dementia, matcell(y), if `idg'_split!=-1 & dementia==1
    matrix list y
    quietly: putexcel set "SipilaUKBresults.xlsx", sheet("FIGURE") modify
        quietly: putexcel M`irow'=(x[2,1]), nformat(number)
        quietly: putexcel N`irow'=(y[2,1]), nformat(number)
    local ++irow

*Those with data on the covariate available and adjusted
stdescribe
quietly: local failures = `r(N_fail)'
if "`ieks'" == "all" {
    stcox `idg'_timedep sex i.ses i.alcocl i.smoking i.bmi_who
    }
else {
    stcox `idg'_timedep sex i.ses i.`ieks'
    }
quietly: matrix m = r(table)
tempname hr ll ul
scalar `hr' = m[1,1]
scalar `ll' = m[5,1]
scalar `ul' = m[6,1]
quietly: putexcel set "SipilaUKBresults.xlsx", sheet("FIGURE") modify
    quietly: putexcel K`irow'=(`e(N_sub)'), nformat(number)
    quietly: putexcel L`irow'=(`e(N_fail)'), nformat(number)
    quietly: putexcel E`irow'=(`hr'), nformat(number_d2)
    quietly: putexcel F`irow'=(`ll'), nformat(number_d2)
    quietly: putexcel G`irow'=(`ul'), nformat(number_d2)
    quietly: putexcel B`irow'=("`idg'")
    quietly: putexcel D`irow'=("Additionally adjusted for `ieks_name'")
    tab `idg', matcell(x), if `idg'_split!=-1
    matrix list x
    tab `idg' dementia, matcell(y), if `idg'_split!=-1 & dementia==1
    matrix list y
    quietly: putexcel set "SipilaUKBresults.xlsx", sheet("FIGURE") modify
        quietly: putexcel M`irow'=(x[2,1]), nformat(number)
        quietly: putexcel N`irow'=(y[2,1]), nformat(number)

    local ++irow
    local ++irow
    restore
}
quietly: local irow = 75
}

capture log close

```



## Supplementary references

1. Royston P, Lambert PC. *Flexible Parametric Survival Analysis Using Stata: Beyond the Cox Model*. College Station, TX: Stata Press; 2011.
2. Lääkintöhallitus. *Classificatio Morborum et Causarum Mortis: Tauti- Ja Kuolinsyyluokitus [Classification of Diseases and Causes of Death]*. Helsinki: Lääkintöhallitus; 1969. <http://urn.fi/URN:NBN:fi-fe201710058910>.
3. Lääkintöhallitus. *Tautiluokitus 1987 : Osa 1 : Systemaattinen Osa [Classification of Diseases 1987: Part 1: Systematic Part]*. Helsinki: Lääkintöhallitus; 1986. <http://urn.fi/URN:NBN:fi-fe201701261356>.
4. Terveiden ja hyvinvoinnin laitos (THL). *Tautiluokitus ICD-10 [Classification of Diseases ICD-10]*. 3rd ed. Helsinki: Terveiden ja hyvinvoinnin laitos (THL); 2011. <http://urn.fi/URN:NBN:fi-fe201205085423>.
5. Kivimäki M, Lawlor DA, Davey Smith G, et al. Socioeconomic position, co-occurrence of behavior-related risk factors, and coronary heart disease: the Finnish Public Sector study. *Am J Public Health*. 2007;97(5):874-879. doi:10.2105/AJPH.2005.078691
6. Heikkilä K, Nyberg ST, Fransson EI, et al. Job strain and alcohol intake: a collaborative meta-analysis of individual-participant data from 140,000 men and women. *PLoS ONE*. 2012;7(7):e40101. doi:10.1371/journal.pone.0040101
7. Lévesque LE, Hanley JA, Kezouh A, Suissa S. Problem of immortal time bias in cohort studies: example using statins for preventing progression of diabetes. *BMJ*. 2010;340:b5087. doi:10.1136/bmj.b5087
8. Korkeila K, Suominen S, Ahvenainen J, et al. Non-response and related factors in a nation-wide health survey. *Eur J Epidemiol*. 2001;17(11):991-999.
9. Väänänen A, Murray M, Koskinen A, Vahtera J, Kouvonen A, Kivimäki M. Engagement in cultural activities and cause-specific mortality: prospective cohort study. *Prev Med*. 2009;49(2-3):142-147. doi:10.1016/j.ypmed.2009.06.026
